# Supplementary material for: The unified quantum mechanical structure of tubular molecular rotors with multiple equivalent global minimum structures: the 18*C2h → D9d case of La-[B2@B18]-La
Source: Royal Society of Chemistry journal article supplement (doi:10.1039/d1cp02980k), 2021-01-01
Supplement: d1cp02980k1.pdf [file d1cp02980k1.pdf]

## Supporting Information

### The unified quantum mechanical structure of tubular molecular rotors with multiple equivalent global minimum structures: The $18^*C_{2h} \rightarrow D_{9d}$ case of La-[B<sub>2</sub>@B<sub>18</sub>]-La

Xiao-Qin Lu,<sup>a,b</sup> Yuan Man,<sup>a,c</sup> Vincent Ruf,<sup>d</sup> Yonghong Xu,<sup>a</sup> Yonggang Yang<sup>\*a,c</sup> and Si-Dian Li<sup>\*b</sup>

<sup>a</sup> State Key Laboratory of Quantum Optics and Quantum Optics Devices, Institute of Laser Spectroscopy, Shanxi University, Taiyuan 030006, P. R. China.

<sup>b</sup> Nanocluster Laboratory, Institute of Molecular Science, Shanxi University, Taiyuan 030006, P. R. China.

<sup>c</sup> Collaborative Innovation Center of Extreme Optics, Shanxi University, Taiyuan 030006, P. R. China.

<sup>d</sup> Institut für Chemie und Biochemie, Freie Universität Berlin, 14195 Berlin, Germany.

\*E-mail: yggyang@sxu.edu.cn; lisidian@sxu.edu.cn.

## SI – Preamble

The following chapters SI I, SI II etc. are written in somewhat didactic style, for readers who are not familiar with e. g. the phenomenon of pseudo-rotations, permutations of equivalent nuclei, the role of nuclear spin isomers, or applications of cyclic molecular symmetry groups to quantum mechanically unified structures of the oriented tubular rotors. These chapters refer to Figures 1,2,3 of the main text and to Figures S1, S2 etc. and to Tables S1, S2 etc. which are compiled at the beginning of SI.

## Table of Contents

**Figure S1:** Eighteen global minimum structures (GMs) of the oriented La-[B<sub>2</sub>@B<sub>18</sub>]-La

**Figure S2:** Eighteen transition states (TSs) of the oriented La-[B<sub>2</sub>@B<sub>18</sub>]-La

**Figure S3:** **a** Vibrational frequencies and irreducible representations (IRREPs) of the vibrational normal modes of eighteen equivalent global minimum structures (GMs) and transition states (TSs) of La-[B<sub>2</sub>@B<sub>18</sub>]-La. **b** Vector arrow plots of two selected normal modes of three GMs and TSs. They are directed approximately along the rotational/pseudo-rotational paths of all nuclei. **c** Superposition of all vector arrow plots of the two selected normal modes of all GMs and all TSs.

**Figure S4:** Five perspective views of **(a)** the superposition of 18 GMs and 18 TSs and **(b)** the unified quantum mechanical structure with 18 interacting GMs of the oriented La-[B<sub>2</sub>@B<sub>18</sub>]-La.

**Figure S5:** Eigenenergies and eigenfunctions of selected rotational/pseudo-rotational eigenstates of the oriented tubular molecular rotor La-[B<sub>2</sub>@B<sub>18</sub>]-La.

**Figure S6:** The cyclic sequences of the reference coordinates of the nucleus of the bearing at the reference angle  $\Phi_1 = 10^\circ$ , *versus* the azimuthal angle of the molecular wheel of the oriented model La-[B<sub>2</sub>@B<sub>18</sub>]-La, together with the pseudo-rotational paths which pass through these sequences.

**Figure S7:** **a** Cyclic sequence of the Cartesian coordinates  $X_j, Y_j$  of the nucleus of the bearing at the reference angle  $\Phi_1 = 10^\circ$ , with parametric dependence on the azimuthal angle of the molecular wheel of the oriented La-[B<sub>2</sub>@B<sub>18</sub>]-La, and with the pseudo-rotational path which passes through this sequence. **b** Vector arrows attached to the balls shown in panel a, as explained for Figure S3c. The vectors at the TSs correlate well with the motions along the pseudo-rotational path.

**Table S1:** Permutations of the boron nuclei of the tubular bearing and of the molecular wheel of the reference global minimum structure GM<sub>1</sub> for the generation of the other GM<sub>2</sub>, ..., GM<sub>18</sub> of the tubular rotor La-[B<sub>2</sub>@B<sub>18</sub>]-La.

**Table S2:** **a** Coordinates of the boron nuclei of the tubular bearing of the reference global minimum structure GM<sub>1</sub> and the transition state TS<sub>18,1</sub> of the oriented rotor La-[B<sub>2</sub>@B<sub>18</sub>]-La. **b** Coordinates of all (=18) boron nuclei of the tubular bearing of all (=18) global minimum structures and transition states of the oriented rotor La-[B<sub>2</sub>@B<sub>18</sub>]-La.

**Table S3:** Rotational/pseudo-rotational energies and irreducible representations of the cyclic molecular symmetry group  $C_{18}(M)$  of the 54 lowest eigenstates of the oriented tubular rotor La-[B<sub>2</sub>@B<sub>18</sub>]-La.

**SI I:** The generation of all global minimum structures of the oriented tubular rotor La-[B<sub>2</sub>@B<sub>18</sub>]-La

**SI II:** The generation of all transition states of the oriented tubular rotor La-[B<sub>2</sub>@B<sub>18</sub>]-La

**SI III:** The cyclic molecular symmetry group  $C_{18}(M)$  of the oriented tubular rotor La-[B<sub>2</sub>@B<sub>18</sub>]-La

**SI IV:** Solution of the Schrödinger equation for the model of the rotating molecular wheel in the pseudo-rotating bearing of the oriented tubular rotor La-[B<sub>2</sub>@B<sub>18</sub>]-La

**SI V:** The effective moment of inertia of the rotation of the molecular wheel in the pseudo-rotating tubular bearing of the oriented rotor La-[B<sub>2</sub>@B<sub>18</sub>]-La

**SI VI:** The nuclear coordinates of 18 equivalent global minimum structures and 18 transition states of the oriented tubular rotor La-[B<sub>2</sub>@B<sub>18</sub>]-La

**SI VII:** The rotating molecular wheel in the pseudo-rotating tubular bearing of the oriented rotor La-[B<sub>2</sub>@B<sub>18</sub>]-La

**SI VIII:** Rotational and pseudo-rotational paths of the nuclei of the oriented tubular rotor La-[B<sub>2</sub>@B<sub>18</sub>]-La

**SI IX:** Support of the model of the rotating molecular wheel in the pseudo-rotating tubular bearing by vector arrow plots of two selected normal modes of La-[B<sub>2</sub>@B<sub>18</sub>]-La

**Figure S1:** Rainbow-colour-coded perspective views of eighteen equivalent global minimum structures  $GM_1, GM_2, \dots, GM_{18}$  of the oriented model tubular molecular rotor  $La-[B_2@B_{18}]-La$ . Nuclei in front and in the back are illustrated by large and small balls, respectively. The z-axis with the two La nuclei (grey balls, the one in front hides the one in the back) points to the viewer. Results calculated at the PBE0 level of quantum chemistry, cf. SI VI-A.

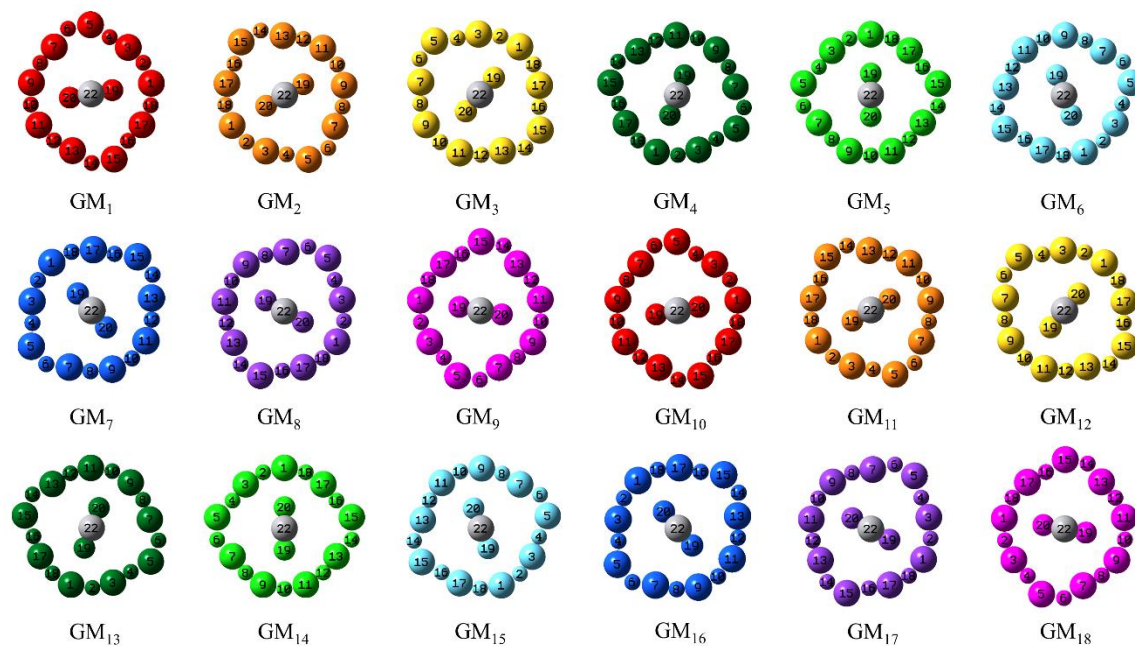

**Figure S2:** Rainbow-colour-coded perspective views of eighteen equivalent transition states  $TS_{18,1}$ ,  $TS_{1,2}$ , ...,  $TS_{17,18}$  of the oriented model tubular molecular rotor  $La-[B_2@B_{18}]-La$ . The notations are as in Figure S1. Results calculated at the PBE0 level of quantum chemistry, cf. SI VI-A.

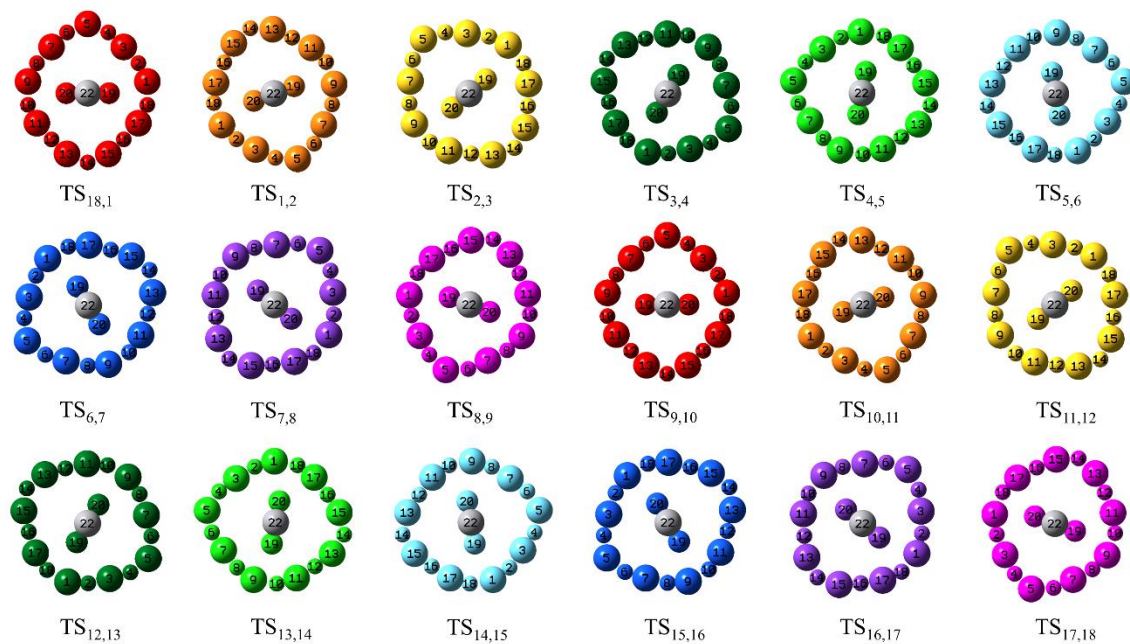

**Figure S3:** **a** Vibrational frequencies and irreducible representations (IRREPs) of the vibrational normal modes of eighteen equivalent global minimum structures (GM, cf. Figure S1) and transition states (TS, cf. Figure S2) of La-[B<sub>2</sub>@B<sub>18</sub>]-La. The molecular point group is C<sub>2h</sub> for GM, and also for TS. The horizontal arrows point to the second lowest b<sub>g</sub> mode (234.79 c cm<sup>-1</sup>) of GM and to the b<sub>g</sub> mode with imaginary frequency (217.84i c cm<sup>-1</sup>) of TS. **b** Perspective views in opposite z-direction of the rainbow-colour-coded vector arrow plots of the two selected b<sub>g</sub> modes of three GMs (filled circles) and TSs (open circles). Large circles are in front (Z > 0), small circles are in the back (Z < 0). The arrows are directed approximately along the rotational/pseudo-rotational paths of the nuclei. **c** Superposition of all (18+18) rainbow-colour-coded vector arrow plots of the two selected b<sub>g</sub> modes of all GMs and TSs. Results calculated at the PBE0 level of quantum chemistry, cf. SI VI-A.

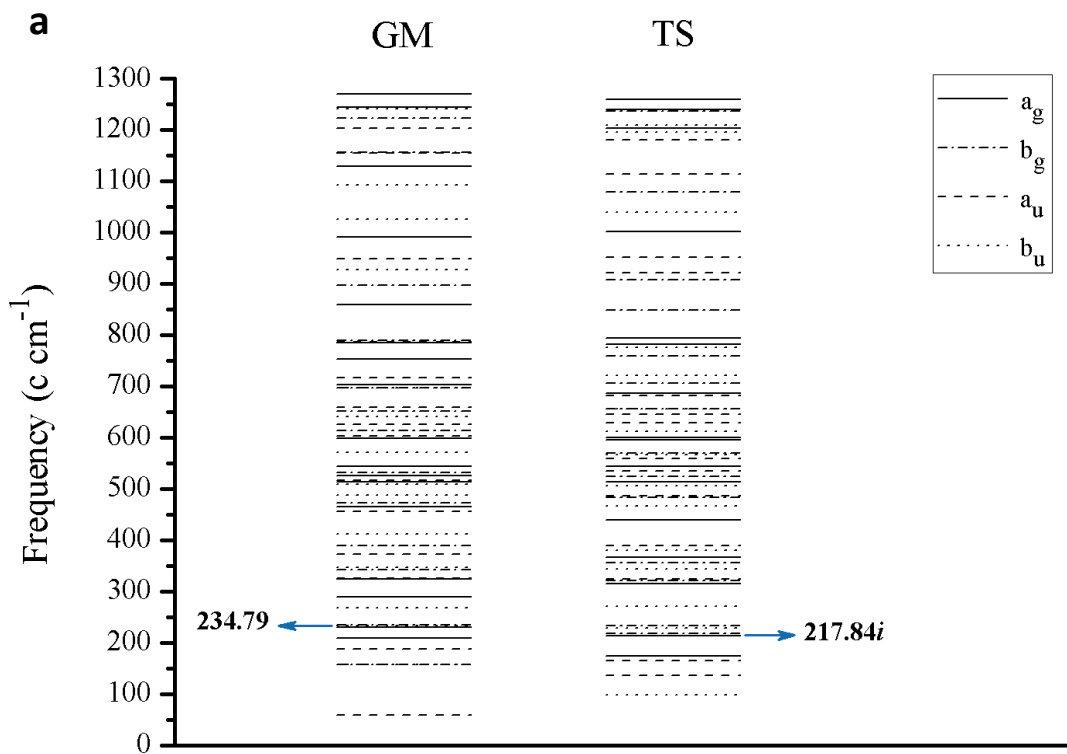

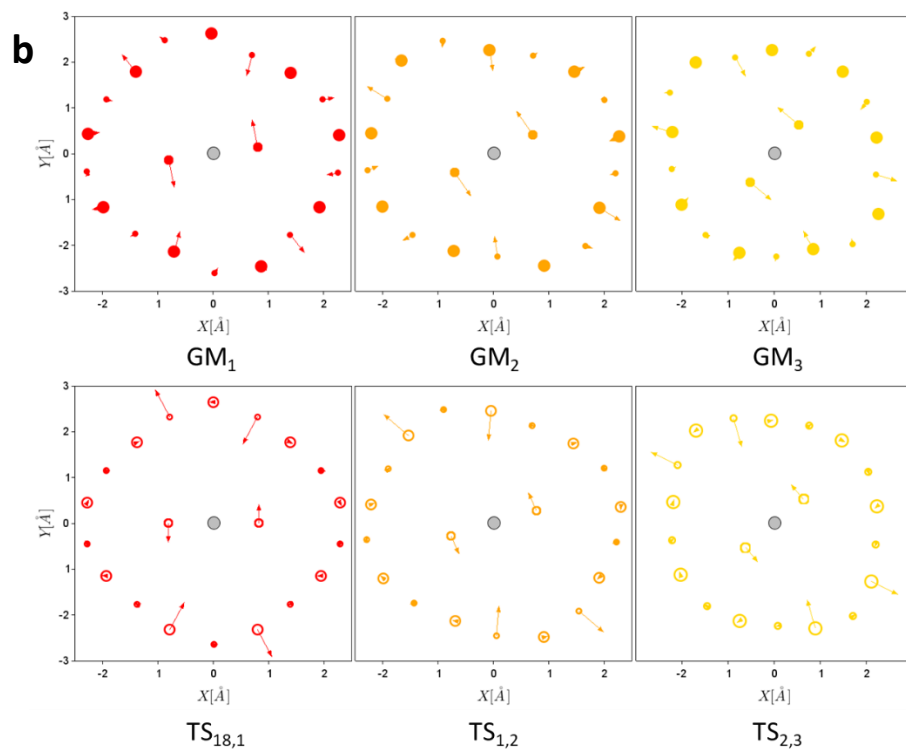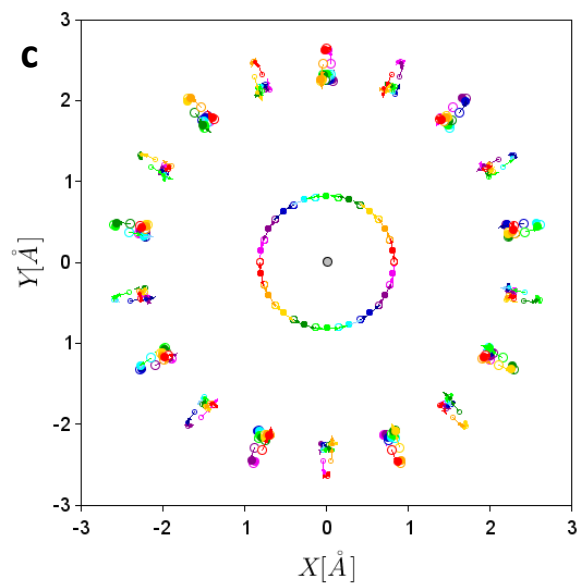

**Figure S4:** Five perspective views of (a) the superposition of 18 rainbow-color-coded global minimum structures (GMs, full balls) and transitions states (TSs, open balls) and (b) the unified quantum mechanical structure with 18 interacting GMs of the oriented La-[B<sub>2</sub>@B<sub>18</sub>]-La. The zig-zag-lines guide the eye along the staggered sequence of the eighteen nuclei of the tubular bearing of the rotor. The 18 loops illustrate the pseudo-rotational paths of the 18 nuclei of the bearing. The insert shows a magnification of one of these pseudo-rotational paths. The two metal nuclei on the z-axis are illustrated by grey balls. In (a), the straight dashed lines from the metal nuclei to the two boron nuclei of the molecular wheel of the rotor illustrate 18 La-B<sub>2</sub>-La rhombi of the 18 GMs. The rotational paths of the two nuclei of the wheel are illustrated by circles. In (b), the dashed lines illustrate the 18-cornered double cone of the unified structure.

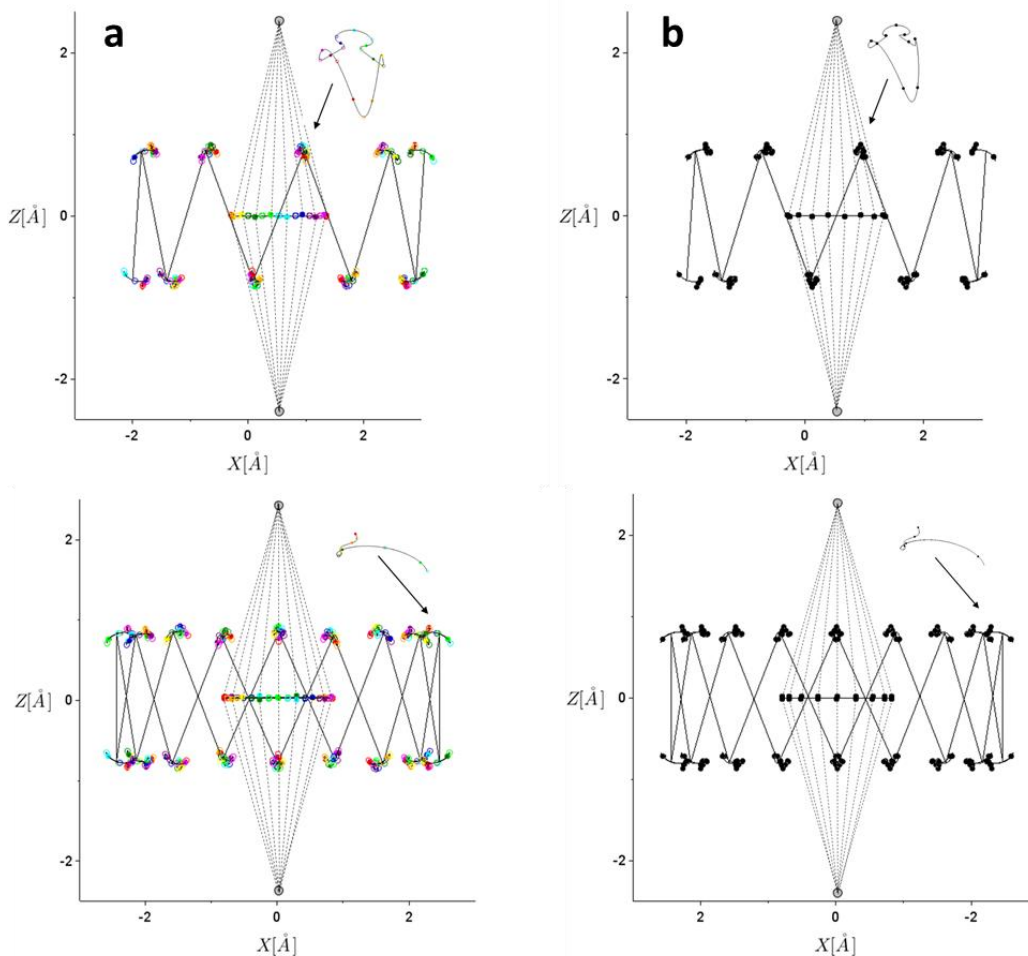



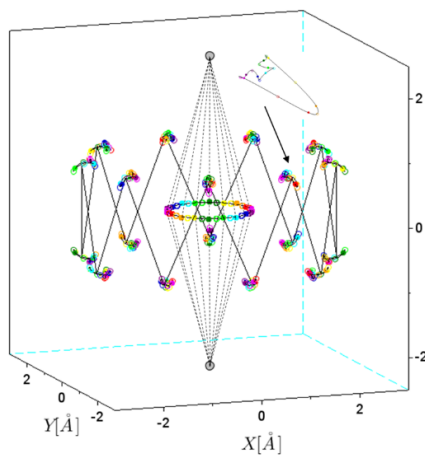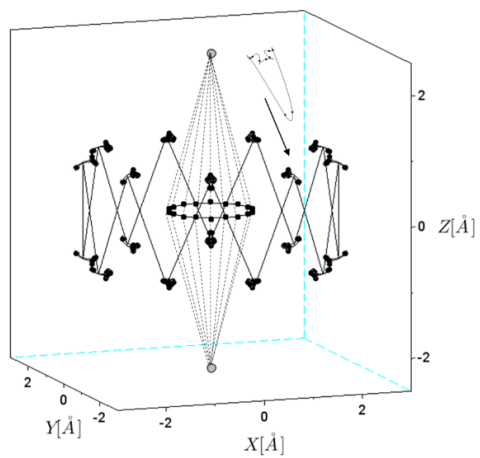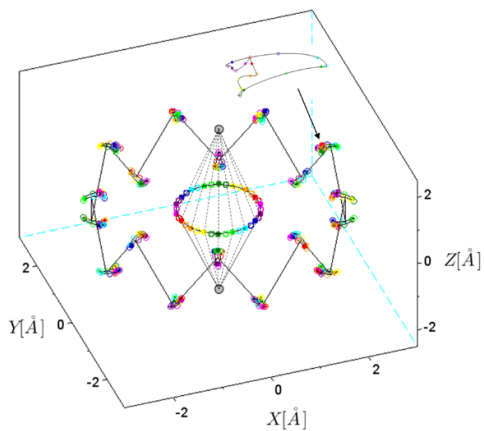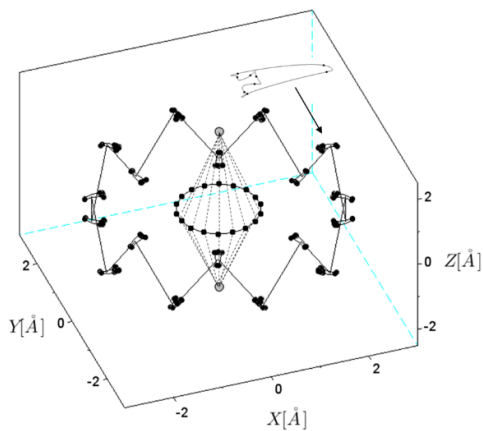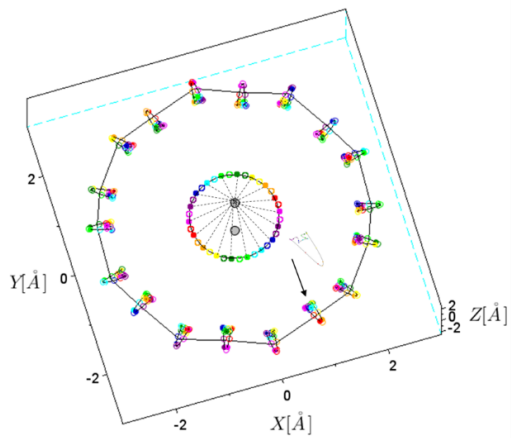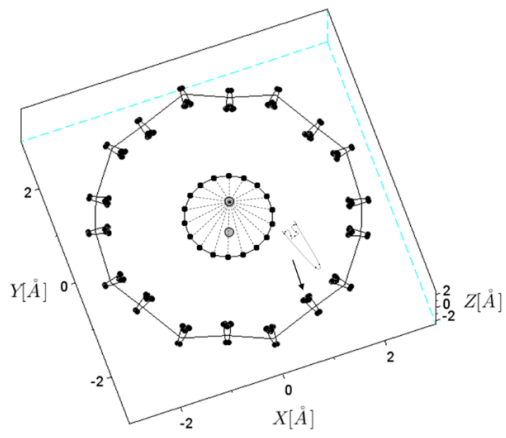

**Figure S5:** Eigenenergies  $E_m$  ( $m=0,17,18,35,36,53$ ) and eigenfunctions  $\Psi_m$  ( $m=0,18,36,53$ ) of selected rotational/pseudo-rotational eigenstates of the oriented tubular molecular rotor La-[B<sub>2</sub>@B<sub>18</sub>]-La. The levels serve as base lines for the eigenfunctions. They are embedded in the model potential  $V$  versus angle  $\varphi$  which specifies the rotation of the molecular wheel (B<sub>2</sub>) in the pseudo-rotating tubular bearing (B<sub>18</sub>), compare with Figure 3. All energies  $E_0 - E_{53}$  are below the potential barrier. The energy levels  $E_{m=0}$  and  $E_{m=17}$  as well as  $E_{m=18}$  and  $E_{m=35}$  appear superimposed, but this is a consequence of the low graphical resolution; their accurate values are non-degenerate, as listed in Table S3. The densities  $\rho_m = |\Psi_m|^2$  look the same in each of the eighteen equivalent potential wells – this means that the eighteen equivalent global minimum structures (GMs) of La-[B<sub>2</sub>@B<sub>18</sub>]-La are populated with the same probability.

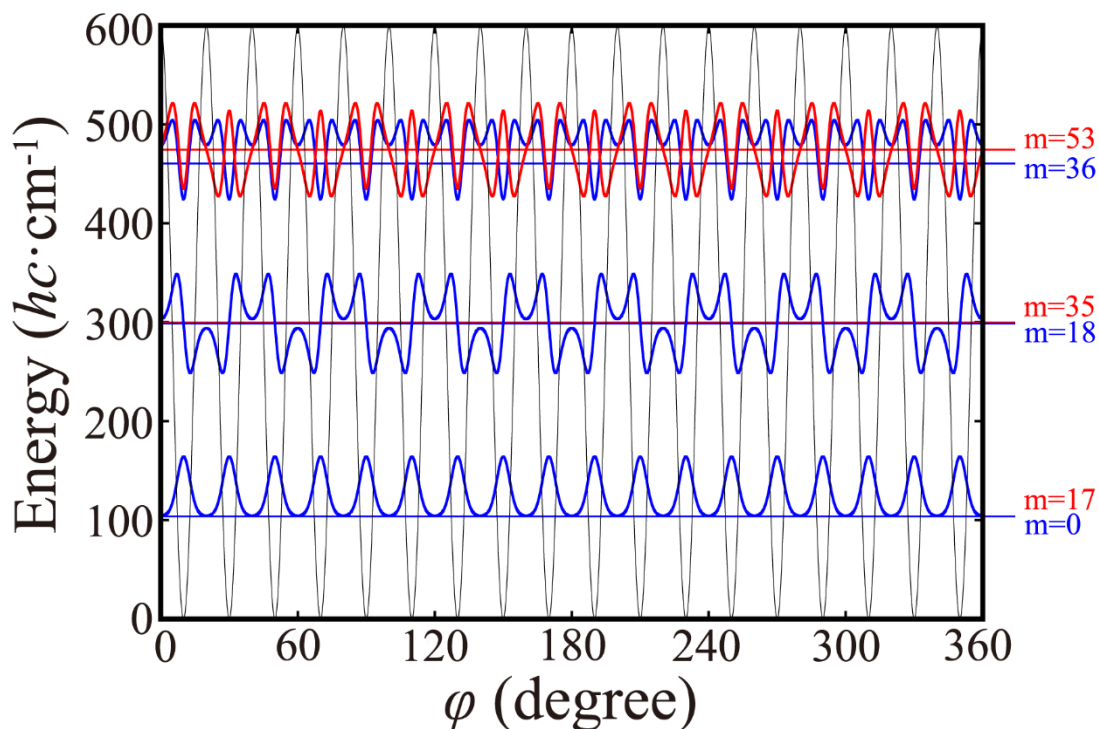

**Figure S6:** The cyclic sequences **a** of the cylindrical reference radial coordinate  $R_j$ , **b** the deviation angle  $-\Delta\Phi_j$ , and **c** the Cartesian coordinates  $X_j, Y_j, |Z_j|$  of the nucleus of the bearing at the reference angle  $\Phi_1 = 10^\circ$ , *versus* the azimuthal angle of the molecular wheel of the model La-[B<sub>2</sub>@B<sub>18</sub>]-La back-rotated by  $\Phi_1 = 10^\circ$ , that means *versus*  $\phi_j = \varphi_j - \Phi_1, j=1, 2, \dots, 36, 37 \equiv 1$ . Alternating filled and open circles refer to global minimum structures and transition states, respectively, from GM<sub>1</sub> ( $\phi_1=0^\circ, j=1$ ) *via* TS<sub>1,2</sub> ( $\phi_2=10^\circ, j=2$ ), GM<sub>2</sub> ( $\phi_3=20^\circ, j=3$ ), ... , GM<sub>18</sub> ( $\phi_{35}=340^\circ, j=34$ ), TS<sub>18,1</sub> ( $\phi_{36}=350^\circ, j=36$ ) back to GM<sub>1</sub> ( $\phi_1 = 360^\circ \equiv 0^\circ, j = 37 \equiv 1$ ), cf. Section SI VII. The pseudo-rotational paths which pass through these sequences are calculated by means of least square fits of symmetry-adapted Fourier series, cf. Section SI VIII.

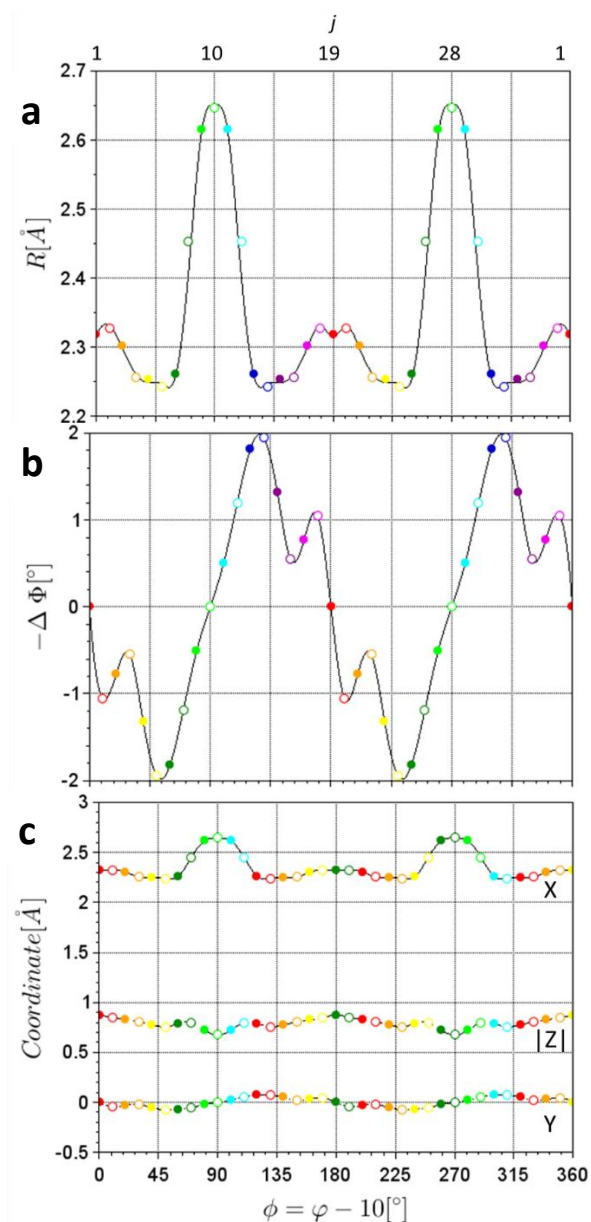

**Figure S7:** **a** Two-dimensional (2d) projection of the cyclic sequence of the Cartesian reference coordinates  $X_j$ ,  $Y_j$ ,  $|Z_j|$  of the nucleus of the bearing at the reference angle  $\Phi_1 = 10^\circ$ , with parametric dependence on the azimuthal angle of the molecular wheel of the model La-[B<sub>2</sub>@B<sub>18</sub>]-La back-rotated by  $\Phi_1$ , that means depending on  $\phi_j = \varphi_j - \Phi_1$ ,  $j = 1, 2, \dots, 35, 36$ . Alternating filled and open circles indicate alternating global minimum structures (GMs) and transition states (TSs), as in Figure S4. The smooth pseudo-rotational paths which pass through these sequences are calculated by means of least square fits of symmetry-adapted Fourier series, cf. Chapter SI VIII. **b** Vector arrows attached to the balls shown in panel a. The vectors are generated from the selected  $b_g$  normal modes of the GMs and TSs, as explained for Figure S3c. The vectors at the TSs correlate well with the motions along the pseudo-rotational path.

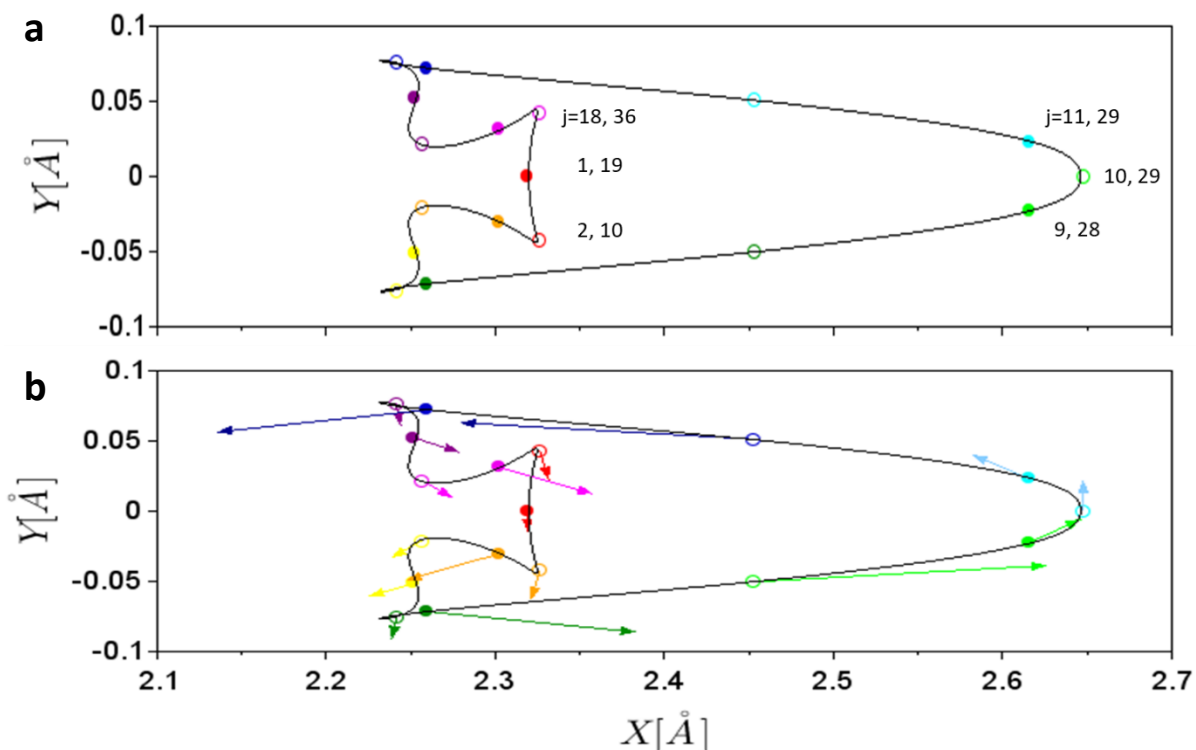

**Table S1:** Permutations of the cyclic molecular symmetry group  $C_{18}(M)$  for the boron nuclei of the tubular bearing (1-18) and of the molecular wheel (19, 20) of the reference global minimum structure  $GM_1$  for the generation of the other  $GM_2, \dots, GM_{18}$  of the oriented molecular rotor  $La-[B_2@B_{18}]-La$ .\*

| $P_k$        | $g_p^k$        | permutation                                                      |
|--------------|----------------|------------------------------------------------------------------|
| $P_1$        | $g_p$          | (1 9 17 7 15 5 13 3 11) (2 10 18 8 16 6 14 4 12) (19 20)         |
| $P_2$        | $g_p^2$        | (1 17 15 13 11 9 7 5 3) (2 18 16 14 12 10 8 6 4)                 |
| $P_3$        | $g_p^3$        | (1 7 13) (3 9 15) (5 11 17) (2 8 14) (4 10 16) (6 12 18) (19 20) |
| $P_4$        | $g_p^4$        | (1 15 11 7 3 17 13 9 5) (2 16 12 8 4 18 14 10 6)                 |
| $P_5$        | $g_p^5$        | (1 5 9 13 17 3 7 11 15) (2 6 10 14 18 4 8 12 16) (19 20)         |
| $P_6$        | $g_p^6$        | (1 13 7) (3 15 9) (5 17 11) (2 14 8) (4 16 10) (6 18 12)         |
| $P_7$        | $g_p^7$        | (1 3 5 7 9 11 13 15 17) (2 4 6 8 10 12 14 16 18) (19 20)         |
| $P_8$        | $g_p^8$        | (1 11 3 13 5 15 7 17 9) (2 12 4 14 6 16 8 18 10)                 |
| $P_9$        | $g_p^9$        | (19 20)                                                          |
| $P_{10}$     | $g_p^{10}$     | (1 9 17 7 15 5 13 3 11) (2 10 18 8 16 6 14 4 12)                 |
| $P_{11}$     | $g_p^{11}$     | (1 17 15 13 11 9 7 5 3) (2 18 16 14 12 10 8 6 4) (19 20)         |
| $P_{12}$     | $g_p^{12}$     | (1 7 13) (3 9 15) (5 11 17) (2 8 14) (4 10 16) (6 12 18)         |
| $P_{13}$     | $g_p^{13}$     | (1 15 11 7 3 17 13 9 5) (2 16 12 8 4 18 14 10 6) (19 20)         |
| $P_{14}$     | $g_p^{14}$     | (1 5 9 13 17 3 7 11 15) (2 6 10 14 18 4 8 12 16)                 |
| $P_{15}$     | $g_p^{15}$     | (1 13 7) (3 15 9) (5 17 11) (2 14 8) (4 16 10) (6 18 12) (19 20) |
| $P_{16}$     | $g_p^{16}$     | (1 3 5 7 9 11 13 15 17) (2 4 6 8 10 12 14 16 18)                 |
| $P_{17}$     | $g_p^{17}$     | (1 11 3 13 5 15 7 17 9) (2 12 4 14 6 16 8 18 10) (19 20)         |
| $P_{18}(=E)$ | $g_p^{18}(=e)$ | (1)                                                              |

- $g_p$  denotes the generator of the permutations.  $E(e)$  denote the identity. For the details, see SI III.

**Table S2:** **a** Cylindrical coordinates of the boron nuclei of the tubular bearing of the reference global minimum structure  $GM_1$  and the transition state  $TS_{18,1}$  of the oriented rotor  $La-[B_2@B_{18}]-La$ .<sup>a</sup> **b** Coordinates of all (=18) boron nuclei of the tubular bearing of all (=18) global minimum structures and transitions states of the oriented rotor  $La-[B_2@B_{18}]-La$ .<sup>b</sup> Results calculated at the PBE0 level of quantum chemistry, cf. SI VI-A.

**a**

| i  | $\Phi_i$ [°] | j  | $\varphi_j$ [°] | $R_j=R_i^{TS}, R_i^{GM}$ [Å] | $\Delta\Phi_j=\Delta\Phi_i^{TS}, \Delta\Phi_i^{GM}$ [°] | $Z_j=Z_i^{TS}, Z_i^{GM}$ [Å] |
|----|--------------|----|-----------------|------------------------------|---------------------------------------------------------|------------------------------|
| 1  | 10           | 0  | 0               | 2.3266                       | -1.0524                                                 | -0.8495                      |
| 1  | 10           | 1  | 10              | 2.3187                       | 0                                                       | 0.8718                       |
| 2  | 30           | 2  | 20              | 2.3266                       | 1.0555                                                  | 0.8497                       |
| 2  | 30           | 3  | 30              | 2.3019                       | 0.7724                                                  | -0.8245                      |
| 3  | 50           | 4  | 40              | 2.2566                       | 0.5481                                                  | -0.8029                      |
| 3  | 50           | 5  | 50              | 2.2524                       | 1.3204                                                  | 0.7749                       |
| 4  | 70           | 6  | 60              | 2.2425                       | 1.9501                                                  | 0.7557                       |
| 4  | 70           | 7  | 70              | 2.2601                       | 1.822                                                   | -0.7892                      |
| 5  | 90           | 8  | 80              | 2.4530                       | 1.1927                                                  | -0.7992                      |
| 5  | 90           | 9  | 90              | 2.6155                       | 0.5031                                                  | 0.7202                       |
| 6  | 110          | 10 | 100             | 2.6476                       | 0.0012                                                  | 0.6743                       |
| 6  | 110          | 11 | 110             | 2.6155                       | -0.5031                                                 | -0.7202                      |
| 7  | 130          | 12 | 120             | 2.4530                       | -1.1887                                                 | -0.7993                      |
| 7  | 130          | 13 | 130             | 2.2601                       | -1.822                                                  | 0.7892                       |
| 8  | 150          | 14 | 140             | 2.2426                       | -1.9456                                                 | 0.7557                       |
| 8  | 150          | 15 | 150             | 2.2524                       | -1.3204                                                 | -0.7749                      |
| 9  | 170          | 16 | 160             | 2.2565                       | -0.5429                                                 | -0.803                       |
| 9  | 170          | 17 | 170             | 2.3019                       | -0.7724                                                 | 0.8245                       |
| 10 | 190          | 18 | 180             | 2.3266                       | -1.0524                                                 | 0.8495                       |
| 10 | 190          | 19 | 190             | 2.3187                       | 0                                                       | -0.8718                      |
| 11 | 210          | 20 | 200             | 2.3266                       | 1.0555                                                  | -0.8497                      |
| 11 | 210          | 21 | 210             | 2.3019                       | 0.7724                                                  | 0.8245                       |
| 12 | 230          | 22 | 220             | 2.2566                       | 0.5481                                                  | 0.8029                       |
| 12 | 230          | 23 | 230             | 2.2524                       | 1.3204                                                  | -0.7749                      |
| 13 | 250          | 24 | 240             | 2.2425                       | 1.9501                                                  | -0.7557                      |
| 13 | 250          | 25 | 250             | 2.2601                       | 1.822                                                   | 0.7892                       |
| 14 | 270          | 26 | 260             | 2.4530                       | 1.1927                                                  | 0.7992                       |
| 14 | 270          | 27 | 270             | 2.6155                       | 0.5031                                                  | -0.7202                      |
| 15 | 290          | 28 | 280             | 2.6476                       | 0.0012                                                  | -0.6743                      |
| 15 | 290          | 29 | 290             | 2.6155                       | -0.5031                                                 | 0.7202                       |
| 16 | 310          | 30 | 300             | 2.4530                       | -1.1887                                                 | 0.7993                       |
| 16 | 310          | 31 | 310             | 2.2601                       | -1.8220                                                 | -0.7892                      |
| 17 | 330          | 32 | 320             | 2.2426                       | -1.9456                                                 | -0.7557                      |
| 17 | 330          | 33 | 330             | 2.2524                       | -1.3204                                                 | 0.7749                       |
| 18 | 360          | 34 | 340             | 2.2565                       | -0.5429                                                 | 0.803                        |
| 18 | 360          | 35 | 350             | 2.3019                       | -0.7724                                                 | -0.8245                      |
| 1  | 10           | 36 | 360             | 2.3266                       | -1.0524                                                 | -0.8495                      |

**b**

| TS / GM             | k  | $\varphi_{k,k+1} [^\circ]$ | i=1                  | 2                    | 3                    | 4                    | 5                    | 6                    |
|---------------------|----|----------------------------|----------------------|----------------------|----------------------|----------------------|----------------------|----------------------|
|                     |    | $\varphi_k [^\circ]$       | $\Phi_i [^\circ]=10$ | 30                   | 50                   | 70                   | 90                   | 110                  |
| TS <sub>18,1</sub>  | 18 | 0                          | 1@T <sub>1,1</sub>   | 2@T <sub>2,2</sub>   | 3@T <sub>3,3</sub>   | 4@T <sub>4,4</sub>   | 5@T <sub>5,5</sub>   | 6@T <sub>6,6</sub>   |
| GM <sub>1</sub>     | 1  | 10                         | 1@G <sub>1,1</sub>   | 2@G <sub>2,2</sub>   | 3@G <sub>3,3</sub>   | 4@G <sub>4,4</sub>   | 5@G <sub>5,5</sub>   | 6@G <sub>6,6</sub>   |
| TS <sub>1,2</sub>   | 1  | 20                         | 9@T <sub>18,1</sub>  | 10@T <sub>1,2</sub>  | 11@T <sub>2,3</sub>  | 12@T <sub>3,4</sub>  | 13@T <sub>4,5</sub>  | 14@T <sub>5,6</sub>  |
| GM <sub>2</sub>     | 2  | 30                         | 9@G <sub>18,1</sub>  | 10@G <sub>1,2</sub>  | 11@G <sub>2,3</sub>  | 12@G <sub>3,4</sub>  | 13@G <sub>4,5</sub>  | 14@G <sub>5,6</sub>  |
| TS <sub>2,3</sub>   | 2  | 40                         | 17@T <sub>17,1</sub> | 18@T <sub>18,2</sub> | 1@T <sub>1,3</sub>   | 2@T <sub>2,4</sub>   | 3@T <sub>3,5</sub>   | 4@T <sub>4,6</sub>   |
| GM <sub>3</sub>     | 3  | 50                         | 17@G <sub>17,1</sub> | 18@G <sub>18,2</sub> | 1@G <sub>1,3</sub>   | 2@G <sub>2,4</sub>   | 3@G <sub>3,5</sub>   | 4@G <sub>4,6</sub>   |
| TS <sub>3,4</sub>   | 3  | 60                         | 7@T <sub>16,1</sub>  | 8@T <sub>17,2</sub>  | 9@T <sub>18,3</sub>  | 10@T <sub>1,4</sub>  | 11@T <sub>2,5</sub>  | 12@T <sub>3,6</sub>  |
| GM <sub>4</sub>     | 4  | 70                         | 7@G <sub>16,1</sub>  | 8@G <sub>17,2</sub>  | 9@G <sub>18,3</sub>  | 10@G <sub>1,4</sub>  | 11@G <sub>2,5</sub>  | 12@G <sub>3,6</sub>  |
| TS <sub>4,5</sub>   | 4  | 80                         | 15@T <sub>15,1</sub> | 16@T <sub>16,2</sub> | 17@T <sub>17,3</sub> | 18@T <sub>18,4</sub> | 1@T <sub>1,5</sub>   | 2@T <sub>2,6</sub>   |
| GM <sub>5</sub>     | 5  | 90                         | 15@G <sub>15,1</sub> | 16@G <sub>16,2</sub> | 17@G <sub>17,3</sub> | 18@G <sub>18,4</sub> | 1@G <sub>1,5</sub>   | 2@G <sub>2,6</sub>   |
| TS <sub>5,6</sub>   | 5  | 100                        | 5@T <sub>14,1</sub>  | 6@T <sub>15,2</sub>  | 7@T <sub>16,3</sub>  | 8@T <sub>17,4</sub>  | 9@T <sub>18,5</sub>  | 10@T <sub>1,6</sub>  |
| GM <sub>6</sub>     | 6  | 110                        | 5@G <sub>14,1</sub>  | 6@G <sub>15,2</sub>  | 7@G <sub>16,3</sub>  | 8@G <sub>17,4</sub>  | 9@G <sub>18,5</sub>  | 10@G <sub>1,6</sub>  |
| TS <sub>6,7</sub>   | 6  | 120                        | 13@T <sub>13,1</sub> | 14@T <sub>14,2</sub> | 15@T <sub>15,3</sub> | 16@T <sub>16,4</sub> | 17@T <sub>17,5</sub> | 18@T <sub>18,6</sub> |
| GM <sub>7</sub>     | 7  | 130                        | 13@G <sub>13,1</sub> | 14@G <sub>14,2</sub> | 15@G <sub>15,3</sub> | 16@G <sub>16,4</sub> | 17@G <sub>17,5</sub> | 18@G <sub>18,6</sub> |
| TS <sub>7,8</sub>   | 7  | 140                        | 3@T <sub>12,1</sub>  | 4@T <sub>13,2</sub>  | 5@T <sub>14,3</sub>  | 6@T <sub>15,4</sub>  | 7@T <sub>16,5</sub>  | 8@T <sub>17,6</sub>  |
| GM <sub>8</sub>     | 8  | 150                        | 3@G <sub>12,1</sub>  | 4@G <sub>13,2</sub>  | 5@G <sub>14,3</sub>  | 6@G <sub>15,4</sub>  | 7@G <sub>16,5</sub>  | 8@G <sub>17,6</sub>  |
| TS <sub>8,9</sub>   | 8  | 160                        | 11@T <sub>11,1</sub> | 12@T <sub>12,2</sub> | 13@T <sub>13,3</sub> | 14@T <sub>14,4</sub> | 15@T <sub>15,5</sub> | 16@T <sub>16,6</sub> |
| GM <sub>9</sub>     | 9  | 170                        | 11@G <sub>11,1</sub> | 12@G <sub>12,2</sub> | 13@G <sub>13,3</sub> | 14@G <sub>14,4</sub> | 15@G <sub>15,5</sub> | 16@G <sub>16,6</sub> |
| TS <sub>9,10</sub>  | 9  | 180                        | 1@T <sub>10,1</sub>  | 2@T <sub>11,2</sub>  | 3@T <sub>12,3</sub>  | 4@T <sub>13,4</sub>  | 5@T <sub>14,5</sub>  | 6@T <sub>15,6</sub>  |
| GM <sub>10</sub>    | 10 | 190                        | 1@G <sub>10,1</sub>  | 2@G <sub>11,2</sub>  | 3@G <sub>12,3</sub>  | 4@G <sub>13,4</sub>  | 5@G <sub>14,5</sub>  | 6@G <sub>15,6</sub>  |
| TS <sub>10,11</sub> | 10 | 200                        | 9@T <sub>9,1</sub>   | 10@T <sub>10,2</sub> | 11@T <sub>11,3</sub> | 12@T <sub>12,4</sub> | 13@T <sub>13,5</sub> | 14@T <sub>14,6</sub> |
| GM <sub>11</sub>    | 11 | 210                        | 9@G <sub>9,1</sub>   | 10@G <sub>10,2</sub> | 11@G <sub>11,3</sub> | 12@G <sub>12,4</sub> | 13@G <sub>13,5</sub> | 14@G <sub>14,6</sub> |
| TS <sub>11,12</sub> | 11 | 220                        | 17@T <sub>8,1</sub>  | 18@T <sub>9,2</sub>  | 1@T <sub>10,3</sub>  | 2@T <sub>11,4</sub>  | 3@T <sub>12,5</sub>  | 4@T <sub>13,6</sub>  |
| GM <sub>12</sub>    | 12 | 230                        | 17@G <sub>8,1</sub>  | 18@G <sub>9,2</sub>  | 1@G <sub>10,3</sub>  | 2@G <sub>11,4</sub>  | 3@G <sub>12,5</sub>  | 4@G <sub>13,6</sub>  |
| TS <sub>12,13</sub> | 12 | 240                        | 7@T <sub>7,1</sub>   | 8@T <sub>8,2</sub>   | 9@T <sub>9,3</sub>   | 10@T <sub>10,4</sub> | 11@T <sub>11,5</sub> | 12@T <sub>12,6</sub> |
| GM <sub>13</sub>    | 13 | 250                        | 7@G <sub>7,1</sub>   | 8@G <sub>8,2</sub>   | 9@G <sub>9,3</sub>   | 10@G <sub>10,4</sub> | 11@G <sub>11,5</sub> | 12@G <sub>12,6</sub> |
| TS <sub>13,14</sub> | 13 | 260                        | 15@T <sub>6,1</sub>  | 16@T <sub>7,2</sub>  | 17@T <sub>8,3</sub>  | 18@T <sub>9,4</sub>  | 1@T <sub>10,5</sub>  | 2@T <sub>11,6</sub>  |
| GM <sub>14</sub>    | 14 | 270                        | 15@G <sub>6,1</sub>  | 16@G <sub>7,2</sub>  | 17@G <sub>8,3</sub>  | 18@G <sub>9,4</sub>  | 1@G <sub>10,5</sub>  | 2@G <sub>11,6</sub>  |
| TS <sub>14,15</sub> | 14 | 280                        | 5@T <sub>5,1</sub>   | 6@T <sub>6,2</sub>   | 7@T <sub>7,3</sub>   | 8@T <sub>8,4</sub>   | 9@T <sub>9,5</sub>   | 10@T <sub>10,6</sub> |
| GM <sub>15</sub>    | 15 | 290                        | 5@G <sub>5,1</sub>   | 6@G <sub>6,2</sub>   | 7@G <sub>7,3</sub>   | 8@G <sub>8,4</sub>   | 9@G <sub>9,5</sub>   | 10@G <sub>10,6</sub> |
| TS <sub>15,16</sub> | 15 | 300                        | 13@T <sub>4,1</sub>  | 14@T <sub>5,2</sub>  | 15@T <sub>6,3</sub>  | 16@T <sub>7,4</sub>  | 17@T <sub>8,5</sub>  | 18@T <sub>9,6</sub>  |
| GM <sub>16</sub>    | 16 | 310                        | 13@G <sub>4,1</sub>  | 14@G <sub>5,2</sub>  | 15@G <sub>6,3</sub>  | 16@G <sub>7,4</sub>  | 17@G <sub>8,5</sub>  | 18@G <sub>9,6</sub>  |
| TS <sub>16,17</sub> | 16 | 320                        | 3@T <sub>3,1</sub>   | 4@T <sub>4,2</sub>   | 5@T <sub>5,3</sub>   | 6@T <sub>6,4</sub>   | 7@T <sub>7,5</sub>   | 8@T <sub>8,6</sub>   |
| GM <sub>17</sub>    | 17 | 330                        | 3@G <sub>3,1</sub>   | 4@G <sub>4,2</sub>   | 5@G <sub>5,3</sub>   | 6@G <sub>6,4</sub>   | 7@G <sub>7,5</sub>   | 8@G <sub>8,6</sub>   |
| TS <sub>17,18</sub> | 17 | 340                        | 11@T <sub>2,1</sub>  | 12@T <sub>3,2</sub>  | 13@T <sub>4,3</sub>  | 14@T <sub>5,4</sub>  | 15@T <sub>6,5</sub>  | 16@T <sub>7,6</sub>  |
| GM <sub>18</sub>    | 18 | 350                        | 11@G <sub>2,1</sub>  | 12@G <sub>3,2</sub>  | 13@G <sub>4,3</sub>  | 14@G <sub>5,4</sub>  | 15@G <sub>6,5</sub>  | 16@G <sub>7,6</sub>  |
| TS <sub>18,1</sub>  | 18 | 360                        | 1@T <sub>1,1</sub>   | 2@T <sub>2,2</sub>   | 3@T <sub>3,3</sub>   | 4@T <sub>4,4</sub>   | 5@T <sub>5,5</sub>   | 6@T <sub>6,6</sub>   |

| TS / GM             | k  | $\varphi_{k,k+1} [^\circ]$ | i=7                   | 8                    | 9                    | 10                    | 11                    | 12                    |
|---------------------|----|----------------------------|-----------------------|----------------------|----------------------|-----------------------|-----------------------|-----------------------|
|                     |    | $\varphi_k [^\circ]$       | $\Phi_i [^\circ]=130$ | 150                  | 170                  | 190                   | 210                   | 230                   |
| TS <sub>18,1</sub>  | 18 | 0                          | 7@T <sub>7,7</sub>    | 8@T <sub>8,8</sub>   | 9@T <sub>9,9</sub>   | 10@T <sub>10,10</sub> | 11@T <sub>11,11</sub> | 12@T <sub>12,12</sub> |
| GM <sub>1</sub>     | 1  | 10                         | 7@G <sub>7,7</sub>    | 8@G <sub>8,8</sub>   | 9@G <sub>9,9</sub>   | 10@G <sub>10,10</sub> | 11@G <sub>11,11</sub> | 12@G <sub>12,12</sub> |
| TS <sub>1,2</sub>   | 1  | 20                         | 15@T <sub>6,7</sub>   | 16@T <sub>7,8</sub>  | 17@T <sub>8,9</sub>  | 18@T <sub>9,10</sub>  | 1@T <sub>10,11</sub>  | 2@T <sub>11,12</sub>  |
| GM <sub>2</sub>     | 2  | 30                         | 15@G <sub>6,7</sub>   | 16@G <sub>7,8</sub>  | 17@G <sub>8,9</sub>  | 18@G <sub>9,10</sub>  | 1@G <sub>10,11</sub>  | 2@G <sub>11,12</sub>  |
| TS <sub>2,3</sub>   | 2  | 40                         | 5@T <sub>5,7</sub>    | 6@T <sub>6,8</sub>   | 7@T <sub>7,9</sub>   | 8@T <sub>8,10</sub>   | 9@T <sub>9,11</sub>   | 10@T <sub>10,12</sub> |
| GM <sub>3</sub>     | 3  | 50                         | 5@G <sub>5,7</sub>    | 6@G <sub>6,8</sub>   | 7@G <sub>7,9</sub>   | 8@G <sub>8,10</sub>   | 9@G <sub>9,11</sub>   | 10@G <sub>10,12</sub> |
| TS <sub>3,4</sub>   | 3  | 60                         | 13@T <sub>4,7</sub>   | 14@T <sub>5,8</sub>  | 15@T <sub>6,9</sub>  | 16@T <sub>7,10</sub>  | 17@T <sub>8,11</sub>  | 18@T <sub>9,12</sub>  |
| GM <sub>4</sub>     | 4  | 70                         | 13@G <sub>4,7</sub>   | 14@G <sub>5,8</sub>  | 15@G <sub>6,9</sub>  | 16@G <sub>7,10</sub>  | 17@G <sub>8,11</sub>  | 18@G <sub>9,12</sub>  |
| TS <sub>4,5</sub>   | 4  | 80                         | 3@T <sub>3,7</sub>    | 4@T <sub>4,8</sub>   | 5@T <sub>5,9</sub>   | 6@T <sub>6,10</sub>   | 7@T <sub>7,11</sub>   | 8@T <sub>8,12</sub>   |
| GM <sub>5</sub>     | 5  | 90                         | 3@G <sub>T3,7</sub>   | 4@G <sub>4,8</sub>   | 5@G <sub>5,9</sub>   | 6@G <sub>6,10</sub>   | 7@G <sub>7,11</sub>   | 8@G <sub>8,12</sub>   |
| TS <sub>5,6</sub>   | 5  | 100                        | 11@T <sub>2,7</sub>   | 12@T <sub>3,8</sub>  | 13@T <sub>4,9</sub>  | 14@T <sub>5,10</sub>  | 15@T <sub>6,11</sub>  | 16@T <sub>7,12</sub>  |
| GM <sub>6</sub>     | 6  | 110                        | 11@G <sub>2,7</sub>   | 12@G <sub>3,8</sub>  | 13@G <sub>4,9</sub>  | 14@G <sub>5,10</sub>  | 15@G <sub>6,11</sub>  | 16@G <sub>7,12</sub>  |
| TS <sub>6,7</sub>   | 6  | 120                        | 1@T <sub>1,7</sub>    | 2@T <sub>2,8</sub>   | 3@T <sub>3,9</sub>   | 4@T <sub>4,10</sub>   | 5@T <sub>5,11</sub>   | 6@T <sub>6,12</sub>   |
| GM <sub>7</sub>     | 7  | 130                        | 1@G <sub>1,7</sub>    | 2@G <sub>2,8</sub>   | 3@G <sub>3,9</sub>   | 4@G <sub>4,10</sub>   | 5@G <sub>5,11</sub>   | 6@G <sub>6,12</sub>   |
| TS <sub>7,8</sub>   | 7  | 140                        | 9@T <sub>18,7</sub>   | 10@T <sub>1,8</sub>  | 11@T <sub>2,9</sub>  | 12@T <sub>3,10</sub>  | 13@T <sub>4,11</sub>  | 14@T <sub>5,12</sub>  |
| GM <sub>8</sub>     | 8  | 150                        | 9@G <sub>18,7</sub>   | 10@G <sub>1,8</sub>  | 11@G <sub>2,9</sub>  | 12@G <sub>3,10</sub>  | 13@G <sub>4,11</sub>  | 14@G <sub>5,12</sub>  |
| TS <sub>8,9</sub>   | 8  | 160                        | 17@T <sub>17,7</sub>  | 18@T <sub>18,8</sub> | 1@T <sub>1,9</sub>   | 2@T <sub>2,10</sub>   | 3@T <sub>3,11</sub>   | 4@T <sub>4,12</sub>   |
| GM <sub>9</sub>     | 9  | 170                        | 17@G <sub>17,7</sub>  | 18@G <sub>18,8</sub> | 1@G <sub>1,9</sub>   | 2@G <sub>2,10</sub>   | 3@G <sub>3,11</sub>   | 4@G <sub>4,12</sub>   |
| TS <sub>9,10</sub>  | 9  | 180                        | 7@T <sub>16,7</sub>   | 8@T <sub>17,8</sub>  | 9@T <sub>18,9</sub>  | 10@T <sub>1,10</sub>  | 11@T <sub>2,11</sub>  | 12@T <sub>3,12</sub>  |
| GM <sub>10</sub>    | 10 | 190                        | 7@G <sub>16,7</sub>   | 8@G <sub>17,8</sub>  | 9@G <sub>18,9</sub>  | 10@G <sub>1,10</sub>  | 11@G <sub>2,11</sub>  | 12@G <sub>3,12</sub>  |
| TS <sub>10,11</sub> | 10 | 200                        | 15@T <sub>15,7</sub>  | 16@T <sub>16,8</sub> | 17@T <sub>17,9</sub> | 18@T <sub>18,10</sub> | 1@T <sub>1,11</sub>   | 2@T <sub>2,12</sub>   |
| GM <sub>11</sub>    | 11 | 210                        | 15@G <sub>15,7</sub>  | 16@G <sub>16,8</sub> | 17@G <sub>17,9</sub> | 18@G <sub>18,10</sub> | 1@G <sub>1,11</sub>   | 2@G <sub>2,12</sub>   |
| TS <sub>11,12</sub> | 11 | 220                        | 5@T <sub>14,7</sub>   | 6@T <sub>15,8</sub>  | 7@T <sub>16,9</sub>  | 8@T <sub>17,10</sub>  | 9@T <sub>18,11</sub>  | 10@T <sub>1,12</sub>  |
| GM <sub>12</sub>    | 12 | 230                        | 5@G <sub>14,7</sub>   | 6@G <sub>15,8</sub>  | 7@G <sub>16,9</sub>  | 8@G <sub>17,10</sub>  | 9@G <sub>18,11</sub>  | 10@G <sub>1,12</sub>  |
| TS <sub>12,13</sub> | 12 | 240                        | 13@T <sub>13,7</sub>  | 14@T <sub>14,8</sub> | 15@T <sub>15,9</sub> | 16@T <sub>16,10</sub> | 17@T <sub>17,11</sub> | 18@T <sub>18,12</sub> |
| GM <sub>13</sub>    | 13 | 250                        | 13@G <sub>13,7</sub>  | 14@G <sub>14,8</sub> | 15@G <sub>15,9</sub> | 16@G <sub>16,10</sub> | 17@G <sub>17,11</sub> | 18@G <sub>18,12</sub> |
| TS <sub>13,14</sub> | 13 | 260                        | 3@T <sub>12,7</sub>   | 4@T <sub>13,8</sub>  | 5@T <sub>14,9</sub>  | 6@T <sub>15,10</sub>  | 7@T <sub>16,11</sub>  | 8@T <sub>17,12</sub>  |
| GM <sub>14</sub>    | 14 | 270                        | 3@G <sub>12,7</sub>   | 4@G <sub>13,8</sub>  | 5@G <sub>14,9</sub>  | 6@G <sub>15,10</sub>  | 7@G <sub>16,11</sub>  | 8@G <sub>17,12</sub>  |
| TS <sub>14,15</sub> | 14 | 280                        | 11@T <sub>11,7</sub>  | 12@T <sub>12,8</sub> | 13@T <sub>13,9</sub> | 14@T <sub>14,10</sub> | 15@T <sub>15,11</sub> | 16@T <sub>16,12</sub> |
| GM <sub>15</sub>    | 15 | 290                        | 11@G <sub>11,7</sub>  | 12@G <sub>12,8</sub> | 13@G <sub>13,9</sub> | 14@G <sub>14,10</sub> | 15@G <sub>15,11</sub> | 16@G <sub>16,12</sub> |
| TS <sub>15,16</sub> | 15 | 300                        | 1@T <sub>10,7</sub>   | 2@T <sub>11,8</sub>  | 3@T <sub>12,9</sub>  | 4@T <sub>13,10</sub>  | 5@T <sub>14,11</sub>  | 6@T <sub>15,12</sub>  |
| GM <sub>16</sub>    | 16 | 310                        | 1@G <sub>10,7</sub>   | 2@G <sub>11,8</sub>  | 3@G <sub>12,9</sub>  | 4@G <sub>13,10</sub>  | 5@G <sub>14,11</sub>  | 6@G <sub>15,12</sub>  |
| TS <sub>16,17</sub> | 16 | 320                        | 9@T <sub>9,7</sub>    | 10@T <sub>10,8</sub> | 11@T <sub>11,9</sub> | 12@T <sub>12,10</sub> | 13@T <sub>13,11</sub> | 14@T <sub>14,12</sub> |
| GM <sub>17</sub>    | 17 | 330                        | 9@G <sub>9,7</sub>    | 10@G <sub>10,8</sub> | 11@G <sub>11,9</sub> | 12@G <sub>12,10</sub> | 13@G <sub>13,11</sub> | 14@G <sub>14,12</sub> |
| TS <sub>17,18</sub> | 17 | 340                        | 17@T <sub>8,7</sub>   | 18@T <sub>9,8</sub>  | 1@T <sub>10,9</sub>  | 2@T <sub>11,10</sub>  | 3@T <sub>12,11</sub>  | 4@T <sub>13,12</sub>  |
| GM <sub>18</sub>    | 18 | 350                        | 17@G <sub>8,7</sub>   | 18@G <sub>9,8</sub>  | 1@G <sub>10,9</sub>  | 2@G <sub>11,10</sub>  | 3@G <sub>12,11</sub>  | 4@G <sub>13,12</sub>  |
| TS <sub>18,1</sub>  | 18 | 360                        | 7@T <sub>7,7</sub>    | 8@T <sub>8,8</sub>   | 9@T <sub>9,9</sub>   | 10@T <sub>10,10</sub> | 11@T <sub>11,11</sub> | 12@T <sub>12,12</sub> |



| TS / GM             | k  | $\varphi_{k,k+1} [^\circ]$ | i=13                  | 14                    | 15                    | 16                    | 17                    | 18                    |
|---------------------|----|----------------------------|-----------------------|-----------------------|-----------------------|-----------------------|-----------------------|-----------------------|
|                     |    | $\varphi_k [^\circ]$       | $\Phi_i [^\circ]=250$ | 270                   | 290                   | 310                   | 330                   | 350                   |
| TS <sub>18,1</sub>  | 18 | 0                          | 13@T <sub>13,13</sub> | 14@T <sub>14,14</sub> | 15@T <sub>15,15</sub> | 16@T <sub>16,16</sub> | 17@T <sub>17,17</sub> | 18@T <sub>18,18</sub> |
| GM <sub>1</sub>     | 1  | 10                         | 13@G <sub>13,13</sub> | 14@G <sub>14,14</sub> | 15@G <sub>15,15</sub> | 16@G <sub>16,16</sub> | 17@G <sub>17,17</sub> | 18@G <sub>18,18</sub> |
| TS <sub>1,2</sub>   | 1  | 20                         | 3@T <sub>12,13</sub>  | 4@T <sub>13,14</sub>  | 5@T <sub>14,15</sub>  | 6@T <sub>15,16</sub>  | 7@T <sub>16,17</sub>  | 8@T <sub>17,18</sub>  |
| GM <sub>2</sub>     | 2  | 30                         | 3@G <sub>12,13</sub>  | 4@G <sub>13,14</sub>  | 5@G <sub>14,15</sub>  | 6@G <sub>15,16</sub>  | 7@G <sub>16,17</sub>  | 8@G <sub>17,18</sub>  |
| TS <sub>2,3</sub>   | 2  | 40                         | 11@T <sub>11,13</sub> | 12@T <sub>12,14</sub> | 13@T <sub>13,15</sub> | 14@T <sub>14,16</sub> | 15@T <sub>15,17</sub> | 16@T <sub>16,18</sub> |
| GM <sub>3</sub>     | 3  | 50                         | 11@G <sub>11,13</sub> | 12@G <sub>12,14</sub> | 13@G <sub>13,15</sub> | 14@G <sub>14,16</sub> | 15@G <sub>15,17</sub> | 16@G <sub>16,18</sub> |
| TS <sub>3,4</sub>   | 3  | 60                         | 1@T <sub>10,13</sub>  | 2@T <sub>11,14</sub>  | 3@T <sub>12,15</sub>  | 4@T <sub>13,16</sub>  | 5@T <sub>14,17</sub>  | 6@T <sub>15,18</sub>  |
| GM <sub>4</sub>     | 4  | 70                         | 1@G <sub>10,13</sub>  | 2@G <sub>11,14</sub>  | 3@G <sub>12,15</sub>  | 4@G <sub>13,16</sub>  | 5@G <sub>14,17</sub>  | 6@G <sub>15,18</sub>  |
| TS <sub>4,5</sub>   | 4  | 80                         | 9@T <sub>9,13</sub>   | 10@T <sub>10,14</sub> | 11@T <sub>11,15</sub> | 12@T <sub>12,16</sub> | 13@T <sub>13,17</sub> | 14@T <sub>14,18</sub> |
| GM <sub>5</sub>     | 5  | 90                         | 9@G <sub>9,13</sub>   | 10@G <sub>10,14</sub> | 11@G <sub>11,15</sub> | 12@G <sub>12,16</sub> | 13@G <sub>13,17</sub> | 14@G <sub>14,18</sub> |
| TS <sub>5,6</sub>   | 5  | 100                        | 17@T <sub>8,13</sub>  | 18@T <sub>9,14</sub>  | 1@T <sub>10,15</sub>  | 2@T <sub>11,16</sub>  | 3@T <sub>12,17</sub>  | 4@T <sub>13,18</sub>  |
| GM <sub>6</sub>     | 6  | 110                        | 17@G <sub>8,13</sub>  | 18@G <sub>9,14</sub>  | 1@G <sub>10,15</sub>  | 2@G <sub>11,16</sub>  | 3@G <sub>12,17</sub>  | 4@G <sub>13,18</sub>  |
| TS <sub>6,7</sub>   | 6  | 120                        | 7@T <sub>7,13</sub>   | 8@T <sub>8,14</sub>   | 9@T <sub>9,15</sub>   | 10@T <sub>10,16</sub> | 11@T <sub>11,17</sub> | 12@T <sub>12,18</sub> |
| GM <sub>7</sub>     | 7  | 130                        | 7@G <sub>7,13</sub>   | 8@G <sub>8,14</sub>   | 9@G <sub>9,15</sub>   | 10@G <sub>10,16</sub> | 11@G <sub>11,17</sub> | 12@G <sub>12,18</sub> |
| TS <sub>7,8</sub>   | 7  | 140                        | 15@T <sub>6,13</sub>  | 16@T <sub>7,14</sub>  | 17@T <sub>8,15</sub>  | 18@T <sub>9,16</sub>  | 1@T <sub>10,17</sub>  | 2@T <sub>11,18</sub>  |
| GM <sub>8</sub>     | 8  | 150                        | 15@G <sub>6,13</sub>  | 16@G <sub>7,14</sub>  | 17@G <sub>8,15</sub>  | 18@G <sub>9,16</sub>  | 1@G <sub>10,17</sub>  | 2@G <sub>11,18</sub>  |
| TS <sub>8,9</sub>   | 8  | 160                        | 5@T <sub>5,13</sub>   | 6@T <sub>6,14</sub>   | 7@T <sub>7,15</sub>   | 8@T <sub>8,16</sub>   | 9@T <sub>9,17</sub>   | 10@T <sub>10,18</sub> |
| GM <sub>9</sub>     | 9  | 170                        | 5@G <sub>5,13</sub>   | 6@G <sub>6,14</sub>   | 7@G <sub>7,15</sub>   | 8@G <sub>8,16</sub>   | 9@G <sub>9,17</sub>   | 10@G <sub>10,18</sub> |
| TS <sub>9,10</sub>  | 9  | 180                        | 13@T <sub>4,13</sub>  | 14@T <sub>5,14</sub>  | 15@T <sub>6,15</sub>  | 16@T <sub>7,16</sub>  | 17@T <sub>8,17</sub>  | 18@T <sub>9,18</sub>  |
| GM <sub>10</sub>    | 10 | 190                        | 13@G <sub>4,13</sub>  | 14@G <sub>5,14</sub>  | 15@G <sub>6,15</sub>  | 16@G <sub>7,16</sub>  | 17@G <sub>8,17</sub>  | 18@G <sub>9,18</sub>  |
| TS <sub>10,11</sub> | 10 | 200                        | 3@T <sub>3,13</sub>   | 4@T <sub>4,14</sub>   | 5@T <sub>5,15</sub>   | 6@T <sub>6,16</sub>   | 7@T <sub>7,17</sub>   | 8@T <sub>8,18</sub>   |
| GM <sub>11</sub>    | 11 | 210                        | 3@G <sub>3,13</sub>   | 4@G <sub>4,14</sub>   | 5@G <sub>5,15</sub>   | 6@G <sub>6,16</sub>   | 7@G <sub>7,17</sub>   | 8@G <sub>8,18</sub>   |
| TS <sub>11,12</sub> | 11 | 220                        | 11@T <sub>2,13</sub>  | 12@T <sub>3,14</sub>  | 13@T <sub>4,15</sub>  | 14@T <sub>5,16</sub>  | 15@T <sub>6,17</sub>  | 16@T <sub>7,18</sub>  |
| GM <sub>12</sub>    | 12 | 230                        | 11@G <sub>2,13</sub>  | 12@G <sub>3,14</sub>  | 13@G <sub>4,15</sub>  | 14@G <sub>5,16</sub>  | 15@G <sub>6,17</sub>  | 16@G <sub>7,18</sub>  |
| TS <sub>12,13</sub> | 12 | 240                        | 1@T <sub>1,13</sub>   | 2@T <sub>2,14</sub>   | 3@T <sub>3,15</sub>   | 4@T <sub>4,16</sub>   | 5@T <sub>5,17</sub>   | 6@T <sub>6,18</sub>   |
| GM <sub>13</sub>    | 13 | 250                        | 1@G <sub>1,13</sub>   | 2@G <sub>2,14</sub>   | 3@G <sub>3,15</sub>   | 4@G <sub>4,16</sub>   | 5@G <sub>5,17</sub>   | 6@G <sub>6,18</sub>   |
| TS <sub>13,14</sub> | 13 | 260                        | 9@T <sub>18,13</sub>  | 10@T <sub>1,14</sub>  | 11@T <sub>2,15</sub>  | 12@T <sub>3,16</sub>  | 13@T <sub>4,17</sub>  | 14@T <sub>5,18</sub>  |
| GM <sub>14</sub>    | 14 | 270                        | 9@G <sub>18,13</sub>  | 10@G <sub>1,14</sub>  | 11@G <sub>2,15</sub>  | 12@G <sub>3,16</sub>  | 13@G <sub>4,17</sub>  | 14@G <sub>5,18</sub>  |
| TS <sub>14,15</sub> | 14 | 280                        | 17@T <sub>17,13</sub> | 18@T <sub>18,14</sub> | 1@T <sub>1,15</sub>   | 2@T <sub>2,16</sub>   | 3@T <sub>3,17</sub>   | 4@T <sub>4,18</sub>   |
| GM <sub>15</sub>    | 15 | 290                        | 17@G <sub>17,13</sub> | 18@G <sub>18,14</sub> | 1@G <sub>1,15</sub>   | 2@G <sub>2,16</sub>   | 3@G <sub>3,17</sub>   | 4@G <sub>4,18</sub>   |
| TS <sub>15,16</sub> | 15 | 300                        | 7@T <sub>16,13</sub>  | 8@T <sub>17,14</sub>  | 9@T <sub>18,15</sub>  | 10@T <sub>1,16</sub>  | 11@T <sub>2,17</sub>  | 12@T <sub>3,18</sub>  |
| GM <sub>16</sub>    | 16 | 310                        | 7@G <sub>16,13</sub>  | 8@G <sub>17,14</sub>  | 9@G <sub>18,15</sub>  | 10@G <sub>1,16</sub>  | 11@G <sub>2,17</sub>  | 12@G <sub>3,18</sub>  |
| TS <sub>16,17</sub> | 16 | 320                        | 15@T <sub>15,13</sub> | 16@T <sub>16,14</sub> | 17@T <sub>17,15</sub> | 18@T <sub>18,16</sub> | 1@T <sub>1,17</sub>   | 2@T <sub>2,18</sub>   |
| GM <sub>17</sub>    | 17 | 330                        | 15@G <sub>15,13</sub> | 16@G <sub>16,14</sub> | 17@G <sub>17,15</sub> | 18@G <sub>18,16</sub> | 1@G <sub>1,17</sub>   | 2@G <sub>2,18</sub>   |
| TS <sub>17,18</sub> | 17 | 340                        | 5@T <sub>14,13</sub>  | 6@T <sub>15,14</sub>  | 7@T <sub>16,15</sub>  | 8@T <sub>17,16</sub>  | 9@T <sub>18,17</sub>  | 10@T <sub>1,18</sub>  |
| GM <sub>18</sub>    | 18 | 350                        | 5@G <sub>14,13</sub>  | 6@G <sub>15,14</sub>  | 7@G <sub>16,15</sub>  | 8@G <sub>17,16</sub>  | 9@G <sub>18,17</sub>  | 10@G <sub>1,18</sub>  |
| TS <sub>18,1</sub>  | 18 | 360                        | 13@T <sub>13,13</sub> | 14@T <sub>14,14</sub> | 15@T <sub>15,15</sub> | 16@T <sub>16,16</sub> | 17@T <sub>17,17</sub> | 18@T <sub>18,18</sub> |

Footnotes for Table S2:

<sup>a</sup> The reference angles for the nuclei of the oriented tubular bearing of La-[B<sub>2</sub>@B<sub>18</sub>]-La are at  $\Phi_1 = 10^\circ$ ,  $\Phi_2 = 30^\circ$ ,  $\Phi_3 = 50^\circ$ , ...,  $\Phi_{18} = 350^\circ$ . In the reference global minimum structure GM<sub>1</sub>, these are occupied by boron nuclei labeled  $i = 1, 2, 3, \dots, 18$ , respectively. The cylindrical coordinates of nucleus  $i$  in GM<sub>1</sub> at  $\Phi_i$  are  $(R_i^{\text{GM}}, \Phi_i + \Delta\Phi_i^{\text{GM}}, Z_i^{\text{GM}})$ . The cylindrical coordinates of nucleus  $i$  in the reference transition state TS<sub>18,1</sub> at  $\Phi_i$  are  $(R_i^{\text{RS}}, \Phi_i + \Delta\Phi_i^{\text{TS}}, Z_i^{\text{TS}})$ . For each label  $i$ , the entry for TS is on top of the entry for GM. The double sets of labels  $i$  can be mapped on labels  $j = 0, 1, 2, \dots, 36$  with azimuthal angle  $\varphi_j$ , cf. Section SI VI.

<sup>b</sup> The short hand notation  $i_k@G_{19-k+i,i}$  specifies the coordinates of the boron nucleus  $i_k$  of the tubular bearing of the global minimum structure GM <sub>$k$</sub>  of the oriented tubular rotor La-[B<sub>2</sub>@B<sub>18</sub>]-La at reference angle  $\Phi_i$ , cf. eqn. (39) in SI VII and Table S2a. Likewise, the short hand notation  $i_k@T_{18-k+i,i}$  specifies the coordinates of the boron nucleus  $i_k$  of the tubular bearing of the transition state TS <sub>$k,k+1$</sub>  of the oriented tubular rotor La-[B<sub>2</sub>@B<sub>18</sub>]-La at reference angle  $\Phi_i$ , cf. eqn. (42) in SI VII and Table S2a. The nucleus  $i$  of the references GM<sub>1</sub> or TS<sub>18,1</sub> at  $\Phi_i$  is replaced by  $i_k$  in GM <sub>$k$</sub>  or TS <sub>$k,k+1$</sub>  by the permutation  $P_{k-1}$  as listed in Table S1.

**Table S3:** Rotational/pseudo-rotational energies  $E_m = E_n$  and irreducible representations of the cyclic molecular symmetry group  $C_{18}(\mathbf{M})$  of the 54 lowest eigenstates of the oriented tubular rotor La-[B<sub>2</sub>@B<sub>18</sub>]-La\*

| Quantum number |   |      | Energy  | Quantum number |   |      | Energy  | Quantum number |   |      | Energy  |
|----------------|---|------|---------|----------------|---|------|---------|----------------|---|------|---------|
| m              | l | n    |         | m              | l | n    |         | m              | l | n    |         |
| 0              | 0 | 0    | 103.685 | 18             | 1 | 9    | 298.682 | 36             | 2 | 0    | 460.457 |
| 1,2            | 0 | 1,17 | 103.686 | 19,20          | 1 | 10,8 | 298.716 | 37,38          | 2 | 1,17 | 460.808 |
| 3,4            | 0 | 2,16 | 103.689 | 21,22          | 1 | 11,7 | 298.815 | 39,40          | 2 | 2,16 | 461.838 |
| 5,6            | 0 | 3,15 | 103.694 | 23,24          | 1 | 12,6 | 298.967 | 41,42          | 2 | 3,15 | 463.469 |
| 7,8            | 0 | 4,14 | 103.700 | 25,26          | 1 | 13,5 | 299.155 | 43,44          | 2 | 4,14 | 465.571 |
| 9,10           | 0 | 5,13 | 103.706 | 27,28          | 1 | 14,4 | 299.356 | 45,46          | 2 | 5,13 | 467.950 |
| 11,12          | 0 | 6,12 | 103.712 | 29,30          | 1 | 15,3 | 299.545 | 47,48          | 2 | 6,12 | 470.344 |
| 13,14          | 0 | 7,11 | 103.716 | 31,32          | 1 | 16,2 | 299.701 | 49,50          | 2 | 7,11 | 472.432 |
| 15,16          | 0 | 8,10 | 103.719 | 33,34          | 1 | 17,1 | 299.803 | 51,52          | 2 | 8,10 | 473.874 |
| 17             | 0 | 9    | 103.720 | 35             | 1 | 0    | 299.839 | 53             | 2 | 9    | 474.390 |

\*All levels (in units of  $hc \text{ cm}^{-1}$ ) are below the potential barrier,  $V_b = 599.27 \text{ hc cm}^{-1}$ . The quantum numbers  $m=ln$  specify the energy bands  $l=0,1,2$  and the irreducible representations  $\Gamma_n$  of the cyclic molecular symmetry group  $C_{18}(\mathbf{M})$ .

## SI I: The generation of all global minimum structures of the oriented tubular rotor La-[B<sub>2</sub>@B<sub>18</sub>]-La

Starting from the reference GM<sub>1</sub> of the oriented tubular molecular rotor La-[B<sub>2</sub>@B<sub>18</sub>]-La, one can generate the cyclic sequence GM<sub>2</sub>, GM<sub>3</sub>, ..., GM<sub>18</sub> of all global minimum structures by sequential applications of a “generator”  $g$  which comprises three operations,  $g = \{g_r, g_a, g_p\}$  where  $g_r$  is a specific rotation of the molecular wheel in the bearing,  $g_a$  is the adjustment, or relaxation of the bearing to the new orientation of the rotated wheel, and  $g_p$  is a specific permutation of the labels of the boron nuclei. The first, second, ..., seventeenth applications of  $g$  transform GM<sub>1</sub> into GM<sub>2</sub>, then GM<sub>2</sub> into GM<sub>3</sub>, ..., GM<sub>17</sub> into GM<sub>18</sub>, respectively. If one adds another (= the eighteenth) application of  $g$ , then it transforms GM<sub>18</sub> in a cyclic manner back to GM<sub>1</sub>. One can also say that 1, 2, ..., 17, 18 applications of  $g$ , that means  $g, g^2, \dots, g^{17}$  and  $e = g^{18}$  (the identity) transform GM<sub>1</sub> into GM<sub>2</sub>, GM<sub>3</sub>, ..., GM<sub>18</sub>, GM<sub>1</sub>, symbolically

$$\begin{aligned} g & : GM_1 \rightarrow GM_2, GM_2 \rightarrow GM_3, \dots, GM_{17} \rightarrow GM_{18}, GM_{18} \rightarrow GM_1 \\ g^k & : GM_1 \rightarrow GM_{k+1} \text{ for } k=1,2,\dots, 17. \\ e = g^{18} & : GM_1 \rightarrow GM_1 \end{aligned} \quad (1)$$

The reference GM<sub>1</sub> and the resulting GM<sub>2</sub>, ..., GM<sub>18</sub> are illustrated in Figure S1.

Let us now specify the operations of the generator  $g = \{g_r, g_a, g_p\}$ , starting with the rotation  $g_r$  of the wheel in the bearing of the tubular molecular rotor La-[B<sub>2</sub>@B<sub>18</sub>]-La. Since the goal is to generate eighteen equivalent GMs,  $g_r$  rotates the wheel by  $360^\circ/18 = 20^\circ$ , symbolically

$$\begin{aligned} g_r & : \varphi \rightarrow \varphi + 20^\circ \text{ mod } 360^\circ \\ g_r^k & : \varphi \rightarrow \varphi + k \cdot 20^\circ \text{ mod } 360^\circ \\ e_r = g_r^{18} & : \varphi \rightarrow \varphi \end{aligned} \quad (2)$$

The azimuthal angle of the reference GM<sub>1</sub> is set to  $\varphi_1 = 10^\circ$ . As consequence, the azimuthal angles  $\varphi_2, \dots, \varphi_{18}$  of the molecular wheel in GM<sub>2</sub>, ..., GM<sub>18</sub> are equal to  $30^\circ, \dots, 350^\circ$ .

The rotation of the wheel  $g_r$  in the bearing of the tubular molecular rotor La<sub>2</sub>[B<sub>2</sub>@B<sub>18</sub>] is associated with the adjustment  $g_a$  of the bearing to the new position of the wheel, and with a specific permutation  $g_p$  of the labels of the boron nuclei. For didactic purposes, this will be explained by two examples. Let us first consider a rather simple case, namely application of  $g^2$  on GM<sub>1</sub> in order to generate GM<sub>3</sub>, cf. Figure 1. For reference, let us recall that GM<sub>1</sub> has C<sub>2h</sub>

symmetry, and the two nuclei of the wheel labeled  $n = 19$  and  $20$  and their nearest neighbors in the bearing – these are the nuclei  $1$  and  $10$  in the boron rings above and below the  $x$ - $y$ -plane, respectively – are in the  $C_{2h}$  symmetry plane. Double application of  $g$  means that the wheel is rotated from  $\varphi_1 = 10^\circ$  by  $2 \cdot 20^\circ = 40^\circ$  to  $\varphi_3 = 50^\circ$ , eq. (2). If the rotation  $g_r^2$  would be carried out in the rigid bearing without any nuclear relaxations and permutations, then the nuclei  $19$  and  $20$  would end up pointing towards the nuclei  $3$  and  $12$  of the bearing of  $GM_1$ , respectively, cf. Figure 1. The rotated nuclei  $19, 20$  and the non-rotated nuclei  $3, 12$ , however, would no longer be in the symmetry plane – the  $C_{2h}$  symmetry of  $GM_1$  would be broken. Clearly, the resulting overall shape of the rotor  $La-[B_2@B_{18}]-La$  would differ from  $GM_1$  – it could no longer be a global minimum structure. To restore the global minimum structure, the bearing must adjust, or relax to the new position of the wheel. This adjustment  $g_a^2$  has to restore in particular the  $C_{2h}$  symmetry with the nuclei  $19, 20$  of the wheel and two opposite nuclei of the bearing in the symmetry plane. This necessary condition requires that the adaption  $g_a^2$  is equivalent to (but it is not the same as!) a hypothetical rotation of the bearing with respect to the wheel, by the same azimuthal angle as the wheel, i. e. by  $40^\circ$ . This rotation would replace the original nuclear labels  $3, 12$  of  $GM_1$  by  $1, 10$  in  $GM_3$  so that the four nuclei  $1, 10, 19, 20$  are back to the  $C_{2h}$  symmetry plane of  $GM_3$ . In fact, the combined rotations of the wheel and the bearing, both by the same angle  $2 \cdot 20^\circ$ , would correspond to the overall rotation of  $GM_1$  by  $2 \cdot 20^\circ$ . The resulting  $GM_3$  then looks like  $GM_1$  rotated by  $40^\circ$ , hence  $GM_3$  is a global minimum structure like  $GM_1$ , cf. Figure 1.

After the discussion of the rotation  $g_r^2$  of the wheel in the bearing and the adjustment  $g_a^2$  of the bearing to the new position of the wheel, let us now address the associated permutation  $g_p^2$  of the nuclear labels. For this purpose, we note that the order of the nuclei in the bearing is robust. As consequence, the replacement of the labels of the nuclei  $3, 12$  in  $GM_1$  by  $1, 10$  in  $GM_3$  implies the automatic replacement of all nuclear labels ( $1, 2, 3, 4, \dots, 12, \dots, 17, 18$ ) in the tubular bearing of  $GM_1$  by ( $17, 18, 1, 2, \dots, 10, \dots, 15, 16$ ) in  $GM_3$ , cf. Figure 1. Hence

$$g_p^2 = (1\ 17\ 15\ 13\ 11\ 9\ 7\ 5\ 3)(2\ 18\ 16\ 14\ 12\ 10\ 8\ 6\ 4). \quad (3)$$

This cyclic notation of the permutation should be read as “the nuclear label  $1$  is replaced by  $17$ , label  $17$  by  $15, \dots$ , nuclear label  $5$  by  $3$ , label  $3$  by  $1$  (*sic*!), nucleus  $2$  by  $18, \dots$ , nucleus  $12$  by  $10$  (*sic*!),  $\dots$ , nucleus  $4$  by  $2$ ”. These replacements are verified by comparison of the nuclear labels in  $GM_1$  and  $GM_3$ , see Figure 1. The cyclic notation in eqn. (3) shows that the odd-valued nuclear labels are permuted among each other, well separated from equivalent permutations of

the even-valued nuclear labels. This is a consequence of the robustness of the cyclic order of the boron nuclei in the two staggered, or interstitial rings of the tubular bearing – the exchange of any two boron nuclei with odd and even labels would imply the exchange of atoms in the rings above and below the x-y-plane, but this is unfeasible at low energies.

As second and slightly more demanding example, let us consider the application of  $g$  on  $GM_1$ , to generate  $GM_2$  of the tubular molecular rotor  $La-[B_2@B_{18}]-La$ , cf. Figure 1. Here  $g_r$  rotates the molecular wheel in the bearing by  $20^\circ$ . If this rotation would be carried out in an inert bearing without any permutations of the nuclear labels, the nuclei 19, 20 of the wheel would point towards the nuclei labeled 2 and 11 of the bearing of  $GM_1$ , cf. Figure 1. As for the first example, this structure would differ from the global minimum structure, and again, in order to restore it, the bearing has to adjust to the new position of the wheel. On first glance, the first example might suggest that this adjustment  $g_a$  should be equivalent to the rotation of the bearing by the same angle as the wheel, i.e. by  $20^\circ$ . But this could not be successful because it would mean, for example, that the nucleus 2 in the reference  $GM_1$  where it is below the x-y-plane should be replaced by nucleus 1 which is above the x-y-plane. This would call for nuclear motion from the boron ring of the tubular bearing below the x-y-plane to the other ring above the x-y-plane, but this is unfeasible in the oriented rotor  $La-[B_2@B_{18}]-La$ . The restoration of the global minimum structure  $GM_2$  can be achieved, however, by an adjustment of the bearing which is equivalent to (but not the same as) a rotation of the bearing with respect to the wheel by  $20^\circ + 180^\circ = 200^\circ$ . Figure 1 shows that now the nucleus 2 of the bearing in  $GM_1$  is replaced by nucleus 10 in  $GM_2$ . This is feasible because both nuclei 2 and 10 are in the boron ring of the bearing below the x-y-plane. The replacement of nucleus 2 by 10 implies the automatic replacement of all labels (1,2,3, ...,10,11, ...,17,18) of the nuclei of the tubular bearing in  $GM_1$  by (9,10,11, ...,18,1, .....,8,9) in  $GM_2$ , cf. Figure 1, due to the robustness of the cyclic order of the nuclei in the tubular bearing. Finally, the restoration of the shape of the bearing of  $GM_1$  in  $GM_2$  must also be accompanied by a small albeit absolutely necessary adjustment of the wheel, namely nucleus 19 should move from its position just below the x-y-plane to the corresponding position just above the x-y-plane, and *vice versa* for nucleus 20. This adjustment is equivalent to the exchange of nuclei 19 and 20. Summing up,  $GM_2$  is generated from the reference  $GM_1$  by

**the generator  $g = \{g_r, g_a, g_p\}$  where**

- $g_r$  rotates the molecular wheel in the bearing,

$$g_r : \varphi \rightarrow \varphi + 20^\circ$$

- $g_a$  adjusts the shape of the bearing to the new azimuthal angle of the molecular wheel,
- $g_p$  permutes the labels of the boron nuclei

$$g_p = (1\ 9\ 17\ 7\ 15\ 5\ 13\ 3\ 11)\ (2\ 10\ 18\ 8\ 16\ 6\ 14\ 4\ 12)\ (19\ 20) \quad (4)$$

This permutation is mathematically equivalent to some number of permutations of pairs of nuclei with odd labels of the upper ring of the tubular bearing, plus the same number of permutations of pairs of nuclei with even labels of the lower ring, plus 1 for the permutation of the two nuclei of the wheel, hence it is equivalent to an odd number of permutations of pairs of boron nuclei. Since the boron nuclei are fermions, the total wavefunction of the tubular rotor must be anti-symmetric i. e. it must change sign upon each permutation of any pair of nuclei. Since  $g_p$  corresponds to an odd number of such permutations of pairs of nuclei, the total wavefunction of the tubular rotor must change sign upon application of  $g_p$ . Since the total wavefunction can be written as product of spatial times nuclear spin wavefunctions, we have

$$\begin{aligned} g_p \Psi_{\text{total}} &= g_p \Psi_{\text{spatial}} * \Psi_{\text{nu.spin}} = g_p \Psi_{\text{spatial}} * g_p \Psi_{\text{nu.spin}} \\ &= - \Psi_{\text{total}} = - \Psi_{\text{spatial}} * \Psi_{\text{nu.spin}}. \end{aligned} \quad (5)$$

As a test, it is gratifying that double application  $g \cdot g$  of the generator ( $g: GM_1 \rightarrow GM_2$ ,  $g: GM_2 \rightarrow GM_3$ , cf. eqn. (1)) yields the same result as the first example ( $g^2: GM_1 \rightarrow GM_3$ ). This is obvious for the rotation  $g_r$  of the wheel in the bearing, and also for the adjustment  $g_a$  of the bearing to the new position of the wheel. Likewise, the permutation  $g_p^2$  (first example, eqn. (3)) is obtained by double application of  $g_p$  (second example, eqn. (4)):

$$\begin{aligned} g_p^2 &= g_p \cdot g_p = (1\ 9\ 17\ 7\ 15\ 5\ 13\ 3\ 11)\ (2\ 10\ 18\ 8\ 16\ 6\ 14\ 4\ 12)\ (19\ 20) \\ &\quad \cdot (1\ 9\ 17\ 7\ 15\ 5\ 13\ 3\ 11)\ (2\ 10\ 18\ 8\ 16\ 6\ 14\ 4\ 12)\ (19\ 20) \\ &= (1\ 17\ 15\ 13\ 11\ 9\ 7\ 5\ 3)\ (2\ 18\ 16\ 14\ 12\ 10\ 8\ 6\ 4). \end{aligned} \quad (6)$$

Likewise, it is straightforward to construct the operators  $g^k = \{g_r, g_a, g_p\}^k$  which generate the remaining  $GM_{k+1}$  from  $GM_1$ ,  $k=3,4,\dots,18$ . For the rotations  $g_r^k$ , the result is already in eqn. (2), i.e. the molecular wheel has to be rotated in the

bearing by  $k \cdot 20^\circ \bmod 360^\circ$ . The adjustment  $g_a^k$  requires the relaxation of the shape of the bearing to the new position of the molecular wheel, analogous to the two examples but now in general for the azimuthal angle  $10^\circ + k \cdot 20^\circ \bmod 360^\circ$ . The permutations  $g_p^k$  can be constructed recursively,  $g_p^k = g_p \cdot g_p^{k-1}$ , starting from eqn. (6). The results  $g_p^k$  are listed in Table S1.

A special case in Table S1 is  $g_p^9 = (19\ 20)$ , i. e. nine sequential applications of the generating permutation  $g_p$  are equivalent to the exchange of the nuclei of the molecular wheel, without any permutations of the nuclei of the bearing. This is confirmed in Figure S1. The subsequent permutations  $g_p^{10}, g_p^{11}, g_p^{12}, \dots$  have the same permutations of the nuclei of the bearing as  $g_p, g_p^2, g_p^3, \dots$ , but opposite permutations of the nuclei of the wheel. This shows that whenever the wheel completes a half cycle, the nuclei of the bearing make a full cycle of permutations.

The adjustment  $g_a$  (in general:  $g_a^k$ ) of the bearing and the permutation  $g_p$  (in general:  $g_p^k$ ) of the nuclear labels imply that the original coordinates of the nuclei in  $GM_1$  are replaced by new ones in  $GM_2$  (in general:  $GM_{k+1}$ ); the details are in SI VI.

The effect of the generator  $g = \{g_r, g_a, g_p\}$  is equivalent another generator  $\tilde{g}$  which comprises the overall rotation ( $R$ ) of the reference  $GM_1$  by  $20^\circ + 180^\circ = 200^\circ$  combined with the permutation  $(19\ 20)$  of the nuclei of the wheel, cf. Figure 1. Symbolically, this alternative set of operations may be written as

**the generator  $\tilde{g} = \{\tilde{g}_R, \tilde{g}_{(19\ 20)}\}$ ,**

- $\tilde{g}_R : \varphi_R \rightarrow (\varphi_R + 20^\circ + 180^\circ) \bmod 360^\circ$
- $\tilde{g}_{(19\ 20)} = (19\ 20)$ . (7)

Irrespective of the same effects of the two generators  $g$  and  $\tilde{g}$ , they are entirely different, i.e. they involve rather small and rather large amplitude motions of the nuclei, respectively. Moreover,  $g$  requires significant permutations of all boron nuclei, eqn. (3), whereas  $\tilde{g}$  invokes permutations of the labels of the nuclear wheel, only. The effects of the operators  $g^k$  (but not the mechanisms!) are the same as  $\tilde{g}^k$  i.e. rotation of  $GM_1$  by  $k \cdot 200^\circ \bmod 360^\circ$  combined with  $k$ -fold exchanges  $(19\ 20)^k$  of the nuclei 19,20 of the wheel.

## SI II: The generation of all transition states of the oriented tubular rotor La-[B<sub>2</sub>@B<sub>18</sub>]-La

The generation of all transition states of the tubular molecular rotor La-[B<sub>2</sub>@B<sub>18</sub>]-La is entirely analogous to the generation of all global minimum structures, cf. SI I. Thus starting from the reference TS<sub>18,1</sub>, one can generate the cyclic sequence TS<sub>1,2</sub>, TS<sub>2,3</sub>, ..., TS<sub>17,18</sub> of all TSs by sequential applications of the generator  $g$  which comprises the familiar three operations,  $g = \{g_r, g_a, g_p\}$ , eqn. (4). That means  $g, g^2, \dots, g^{17}$  and  $e = g^{18}$  transform TM<sub>18,1</sub> into TS<sub>1,2</sub>, TS<sub>2,3</sub>, ..., TS<sub>17,18</sub> and then back to TS<sub>18,1</sub>, symbolically

$$\begin{aligned} g & : \text{TS}_{18,1} \rightarrow \text{TS}_{1,2}, \text{TS}_{1,2} \rightarrow \text{TS}_{2,3}, \dots, \text{TS}_{16,17} \rightarrow \text{TS}_{17,18}, \text{TS}_{17,18} \\ & \hspace{15em} \rightarrow \text{TS}_{18,1} \\ g^k & : \text{TS}_{18,1} \rightarrow \text{TS}_{k,k+1} \text{ for } k=1,2,\dots, 17, \\ e = g^{18} & : \text{TS}_{18,1} \rightarrow \text{TS}_{18,1}, \end{aligned} \quad (8)$$

analogous to eqn. (1) for the GMs. The same effects (but different mechanisms!) are achieved by sequential applications of the generator  $\tilde{g} = \{\tilde{g}_R, \tilde{g}_{(19\ 20)}\}$ , eqn. (7),

$$\begin{aligned} \tilde{g} & : \text{TS}_{18,1} \rightarrow \text{TS}_{1,2}, \text{TS}_{1,2} \rightarrow \text{TS}_{2,2}, \dots, \text{TS}_{16,17} \rightarrow \text{TS}_{17,18}, \text{TS}_{17,18} \\ & \hspace{15em} \rightarrow \text{TS}_{18,1} \\ \tilde{g}^k & : \text{TS}_{18,1} \rightarrow \text{TS}_{n,n+1} \text{ for } k=1,2,\dots, 17. \\ e = \tilde{g}^{18} & : \text{TS}_{18,1} \rightarrow \text{TS}_{18,1}. \end{aligned} \quad (9)$$

The azimuthal angle of the reference TS<sub>18,1</sub> is  $\varphi_{18,1} = 0^\circ$ , halfway between the angles  $\varphi_{18} = 350^\circ$  and  $\varphi_1 = 10^\circ$  of the neighboring GM<sub>18</sub> and GM<sub>1</sub>. As consequence, the azimuthal angles  $\varphi_{1,2}, \dots, \varphi_{17,18}$  of the molecular wheel in TS<sub>1,2}, \dots, TS<sub>17,18</sub> are equal to  $20^\circ, \dots, 340^\circ$ .</sub>

The reference TS<sub>18,1</sub> and the resulting TS<sub>1,2}, \dots, TS<sub>17,18</sub> are illustrated in Figures 1 and S2.</sub>

## SI III: The cyclic molecular symmetry group C<sub>18</sub>(M) of the oriented tubular rotor La-[B<sub>2</sub>@B<sub>18</sub>]-La

The set of the identity operator  $e$ , the generator  $g$  and sixteen multiple ( $k=2, 3, \dots, 16, 17$ ) applications of  $g$  (cf. SI5) establishes the cyclic molecular symmetry group



$$C_{18}(M) = \{e, g, g^2, g^3, \dots, g^{17}\} \quad (10)$$

of the oriented tubular rotor La-[B<sub>2</sub>@B<sub>18</sub>]-La, with  $g^k \cdot g^{k'} = g^{(k+k') \bmod 18}$ . Its order is  $N = 18$ . According to Ref. 24, it can be represented by the cyclic graph Gr(18,2) for 18 connected global minima and 2 energy pathways leading to each minimum. For comparison, the order of the full permutation-inversion (FPI) group is  $2! \cdot 20! \cdot 2$ . Each global minimum has C<sub>2h</sub> symmetry, with order 4. Accordingly, the total number of all global minima of the FPI group is  $N_{\text{FPI}} = 2! \cdot 20! \cdot 2 / 4 = 20!$ . As consequence, at low energies, its graph Gr<sub>FPI</sub>(20!, 2) is split into  $k = N_{\text{FPI}} / N = 20! / 18$  disconnected graphs Gr(18,2). The cyclic molecular symmetry group  $C_{18}(M)$  is isomorphic to the corresponding groups for the rotations of the molecular wheel in the bearing, for the adjustment of the bearing to the new position of the wheel, and for the permutations of the nuclear labels,

$$C_{18}(M)_r = \{e_r, g_r, g_r^2, g_r^3, \dots, g_r^{17}\}$$

$$C_{18}(M)_a = \{e_a, g_a, g_a^2, g_a^3, \dots, g_a^{17}\}$$

$$C_{18}(M)_p = \{e_p, g_p, g_p^2, g_p^3, \dots, g_p^{17}\}. \quad (11)$$

The four group theorems (completeness of the group, existence of the identity  $e$ , existence of the inverse element  $g^{18-k}$  of  $g^k$ , and the associative law) are satisfied obviously. Moreover, the group operations commute,  $g^k \cdot g^{k'} = g^{k'} \cdot g^k$ , i. e. the cyclic molecular symmetry group  $C_{18}(M)$  is Abelian.

The cyclic molecular symmetry group  $C_{18}(M)$  is also isomorphic to the group

$$\tilde{C}_{18}(M) = \{\tilde{e}, \tilde{g}, \tilde{g}^2, \tilde{g}^3, \dots, \tilde{g}^{17}\} \quad (12)$$

of the combined operations, eqn. (7), but again, the present  $g$  and the alternative  $\tilde{g}$  are entirely different.

The general properties of cyclic groups imply that the present cyclic group  $C_{18}(M)$  has 18 one-dimensional irreducible representations (IRREPs)  $\Gamma_n$ ,  $n=0,1,2,\dots,17$  with characters [13]

$$\chi^{\Gamma_n}(g^k) = \epsilon^{nk}, \quad \epsilon = \exp(-2\pi i/18), \quad n, k = 0, 1, 2, \dots, 17. \quad (13)$$

The corresponding symmetry projection operators for IRREP  $\Gamma_n$  are

$$P^{\Gamma_n} = (1/18) \sum_{k=0}^{17} \chi^{\Gamma_n}(g^k)^* g^k, \quad n = 0, 1, 2, \dots, 17. \quad (14)$$

Analogous expressions (with  $g$  replaced by  $\tilde{g}$  etc) hold for the other isomorphic cyclic molecular symmetry groups, particularly for  $\tilde{C}_{18}(M)$  and also for  $C_{18}(M)_r$ ,  $C_{18}(M)_a$  and  $C_{18}(M)_p$ .

The combined operations  $\tilde{g}$ , eqn. (7), commute with the molecular Hamiltonian  $H_{\text{mol}}$ , because the molecular energies do not depend, neither on the molecular orientation, nor on the exchange of the labels of nuclei 19 and 20. Likewise, the combined operation  $g$ , eqn. (4), commutes with  $H_{\text{mol}}$  – after all, the effects of  $g$  and  $\tilde{g}$  are equivalent. Moreover, repeated applications  $g^k$  of  $g$  (or  $\tilde{g}^k$  of  $\tilde{g}$ ) commute with  $H_{\text{mol}}$ . As consequence, the symmetry projection operators (14) of  $C_{18}(M)$  (or analogous symmetry projection operators of  $\tilde{C}_{18}(M)$ ) commute with  $H_{\text{mol}}$ ,

$$[H_{\text{mol}}, g^k] = [H_{\text{mol}}, P^{\Gamma_n}] = 0. \quad (15)$$

The molecular eigenstates are characterized, therefore, not only by their eigenenergies, but they can also be assigned to specific IRREPs  $\Gamma_n$  of  $C_{18}(M)$ , with characters  $\chi^{\Gamma_n}(g^k)$ . This “unified” assignment is more general compared to the assignments of the IRREPs  $a_g$ ,  $b_g$ ,  $a_u$  and  $b_u$  of the “local” molecular point groups  $C_{2h}$  of the individual GMs. For example, the normal mode  $v_8^{\text{GM}}$  can be assigned to IRREP  $b_g$  for the  $C_{2h}$  symmetry of  $\text{GM}_1$ , but it cannot be assigned to any IRREP of the  $C_{2h}$  symmetries of the other GMs, because they have different local symmetry elements e. g. the  $C_2$  axes of the GMs have different orientations. In contrast, eqn. (15) implies that one can assign the vibrational modes of  $\text{La}[\text{B}_2@B_{18}]\text{-La}$  to the IRREPs  $\Gamma_n$  of the molecular symmetry group  $C_{18}(M)$ , and these modes comprise all GMs. An important example, namely for the “unified” extension of all “local” normal modes  $v_8^{\text{GM}}$  of all GMs to the corresponding “unified” vibrational modes with IRREPs  $\Gamma_n$  of the molecular symmetry group  $C_{18}(M)$  of  $\text{La}[\text{B}_2@B_{18}]\text{-La}$ , will be presented in SI IV.

#### **SI IV: Solution of the Schrödinger equation for the model of the rotating molecular wheel in the pseudo-rotating bearing of the oriented tubular rotor $\text{La}[\text{B}_2@B_{18}]\text{-La}$**

The rotation of the molecular wheel ( $B_2$ ) along the angle  $\varphi$  in the oriented pseudo-rotating tubular bearing ( $B_{18}$ ) of the rotor  $\text{La}[\text{B}_2@B_{18}]\text{-La}$ , with the two

La nuclei as spectators on the cylindrical axis, is described quantum mechanically by means of the time independent Schrödinger equation (TISE)

$$H(\varphi) \Psi_m(\varphi) = E_m \Psi_m(\varphi). \quad (16)$$

The model Hamiltonian

$$H(\varphi) = T(\varphi) + V(\varphi) \quad (17)$$

in eqn. (16) accounts for the kinetic and potential energies of the rotational/pseudo-rotational motions. Specifically,

$$T(\varphi) = l_\varphi^2 / (2 I_{\text{eff}}) \quad (18)$$

with effective moment of inertia  $I_{\text{eff}}$ , as derived in SI V, and with angular momentum operator

$$l_\varphi = -i \hbar d/d\varphi \quad (19)$$

for the rotation of the molecular wheel in the oriented pseudo-rotating tubular bearing. The cyclic model potential  $V(\varphi) = 0.5 * V_b [1 + \cos(18 \varphi)]$  with its eighteen equivalent potential minima supporting eighteen equivalent global minimum structures, separated by eighteen equivalent transition states, is shown in Figure 3.

The TISE (16) is solved for the rotational/pseudo-rotational eigenenergies  $E_m$  and eigenfunctions  $\Psi_m(\varphi)$  of the eigenstates labeled  $m = 0, 1, 2, \dots$ , with cyclic boundary conditions

$$\Psi_m(\varphi=0) = \Psi_m(\varphi=2\pi), \quad (20)$$

by means of the methods which have been developed for planar boron rotors such as  $B_{11}^-$  or  $B_{13}^+$ , cf. Refs. [14, 16]. Suffice it here to say that the eigenfunctions are expanded in terms of normalized basis functions  $(1/\sqrt{2\pi}) \exp(i l \varphi)$  which satisfy the boundary conditions (20) automatically,

$$\Psi_m(\varphi) = \sum_{l=l_{\text{min}}}^{l_{\text{max}}} c_{ml} (1/\sqrt{2\pi}) \exp(i l \varphi). \quad (21)$$

In principle, the sum  $\sum_{l=l_{\text{min}}}^{l_{\text{max}}}$  should run from  $l_{\text{min}} = -\infty$  to  $l_{\text{max}} = +\infty$ . In practice, converged results are obtained by truncating the sum to lower and upper

boundaries  $l_{\min} = 360$  and  $l_{\max} = 360$ . The expansion (21) allows to transform the TISE (16) into the algebraic version

$$\mathbf{H} \mathbf{c}_m = \mathbf{c}_m E_m \quad (22)$$

with the vector  $\mathbf{c}_m$  of the expansion coefficients  $c_{ml}$ . The notations are also adapted from Refs. [14, 16]; in particular, the ground state is denoted by the quantum number  $m=0$ , and the quantum numbers  $m$  increase with energy  $E_m$ .

The resulting eigenenergies  $E_m$  with quantum numbers  $m=0-53$  are listed in Table S3. This Table is for the complete set of eigenstates with energies below the potential barrier  $V_b$ . The energy levels for six examples with quantum numbers  $m = 0, 17, 18, 35, 36, 53$  are illustrated in Figure S5. Apparently, these 54 energies are arranged in three narrow “bands” which are separated from each other by rather large energy gaps. The bands may be labeled by “band energy quantum numbers”  $l=0,1,2$  (see also eqn. (23) below). Each energy band has eighteen rotational/pseudo-rotational eigenstates, i. e. the lowest band ( $l=0$ ) has the states with energies  $E_m$  labeled  $m=0-17$ , the first excited band ( $l=1$ ) is for  $m=18-35$ , and the second excited band ( $l=2$ ) contains  $E_m$  labeled  $m=36-53$ . In each band, the lowest and highest energies are non-degenerate, whereas all other energies are doubly degenerate, e.g.  $E_1 = E_2, E_3 = E_4, \dots, E_{15} = E_{16}$  for the lowest band ( $l=0$ ),  $E_{19} = E_{20}, \dots, E_{33} = E_{34}$  for band  $l=1$  and  $E_{37} = E_{38}, \dots, E_{51} = E_{52}$  for band  $l=2$ .

The six energy levels which are shown in Figure S5 are the lowest and highest non-degenerate levels of each band. The corresponding band widths of energy bands  $l=0,1$  and  $2$  are equal to  $0.035, 1.157$  and  $13.833 \text{ h c cm}^{-1}$ , respectively, i. e. they grow rapidly with band energy quantum number  $l$ . The energy gaps between the centers of bands  $l = 0$  and  $1$  is  $\Delta E_{0,1} = (299.2 - 103.7 = 195.5) \text{ h c cm}^{-1}$ . The corresponding energy gap between bands  $l=1$  and  $2$  is  $\Delta E_{1,2} = (467.5 - 299.2 = 168.3) \text{ h c cm}^{-1}$ .

To interpret the results for the rotational/pseudo-rotational levels of the oriented tubular molecular rotor  $\text{La}[\text{B}_2@ \text{B}_{18}]\text{-La}$ , it is illuminating to consider first, for reference, the traditional picture of eighteen individual, non-interacting global minimum structures. In normal mode approximation, each of the GMs has its individual, non-interacting harmonic potential along the corresponding normal mode- here this is the selected  $b_g$  normal mode  $v^{\text{GM}}=8$  with vibrational energy quantum  $\hbar\omega_8^{\text{GM}} = 234.79 \text{ h c cm}^{-1}$ . Accordingly, the eighteen GMs have corresponding eighteen degenerate eigenenergies. In harmonic approximation, the lowest three levels are  $E_{l=0} = 0.5 \hbar\omega_8^{\text{GM}} = 117.395 \text{ h c cm}^{-1}$ ,  $E_{l=1} = 1.5 \hbar\omega_8^{\text{GM}}$

= 352.185 h c cm<sup>-1</sup> and  $E_{1=2} = 2.5 \hbar\omega_8^{\text{GM}} = 586.975 \text{ h c cm}^{-1}$ , respectively- all below the potential barrier  $V_b$ .

In contrast with the traditional picture of eighteen non-interacting GMs, the unified quantum mechanical picture provides the anharmonic potential  $V(\varphi)$  with eighteen equivalent minima supporting eighteen equivalent GMs which interact. For the present energies below the potential barrier, the interaction is by tunneling. For didactic purpose, it is helpful to recall that tunneling in a double well potential with two minima for two GMs yields tunneling splitting of pairs of two degenerate levels of two individual GMs into a pairs of two non-degenerate levels of the interacting GMs. The tunneling splitting  $\Delta E$  is related to the tunneling time  $T$  by the relation  $\Delta E * T = h$ . The higher is the barrier, the more difficult is the tunneling, that means the longer is  $T$  and the narrower is  $\Delta E$ . Excited states have higher energies closer to the potential barrier – this facilitates the tunneling, decreases the tunneling time  $T$  and hence increases the tunneling splitting  $\Delta E$ . By analogy, the present potential with eighteen potential wells yields tunneling splitting of sets of eighteen degenerate levels of eighteen individual GMs into “bands” of (partially) non-degenerate levels of the interacting GMs. The tunneling splitting  $\Delta E$  of the double well corresponds to the band width  $\Delta E$ . The higher is the barrier, the more difficult is the tunneling, and the narrower is the band width  $\Delta E$ . Excited states have higher energies closer to the potential barrier – this facilitates the tunneling, and increases the band width  $\Delta E$ .

The gaps between the centers of the bands,  $\Delta E_{0,1} = 195.5 \text{ h c cm}^{-1}$  and  $\Delta E_{1,2} = 168.3 \text{ h c cm}^{-1}$ , of the interacting GMs are smaller than the reference vibrational quantum  $\hbar\omega_8^{\text{GM}} = 234.79 \text{ h c cm}^{-1}$  of the non-interacting GMs. There are two effects which contribute to this deviation: Firstly, the anharmonicity of the cosinusoidal potential implies the systematic decrease from the harmonic reference to  $\Delta E_{0,1}$  and then further down to  $\Delta E_{1,2}$ . Secondly, the present choice of the approximate value of the effective moment of inertia,  $I_{\text{eff}} = 68.98 \text{ u}\text{\AA}^2$ , uses the value of the vibrational quantum  $|\hbar\omega_i^{\text{TS}}| = 217.84 \text{ h c cm}^{-1}$  of the normal mode  $\nu_i^{\text{TS}}$  of the transition state, instead of the higher value  $\hbar\omega_8^{\text{GM}} = 234.79 \text{ h c cm}^{-1}$  for the global minimum, cf. SI V.

The wavefunctions  $\Psi_m(\varphi)$  which are shown in Figures 3 and S5 correspond to densities  $\rho_m(\varphi) = |\Psi_m(\varphi)|^2$  which look the same in analogous domains of the eighteen potential wells of  $V(\varphi)$ . This property holds for all eigenfunctions, also for those which are not shown in Figure S5. This means that the rotational/pseudo-rotational eigenstates of the model La-[B<sub>2</sub>@B<sub>18</sub>]-La represent equal populations of all eighteen equivalent GMs. In particular, the ground state

wavefunction  $\Psi_{m=0}(\varphi)$  yields the density  $\rho_{m=0}(\varphi)$  with eighteen equivalent maxima which are centered at the potential minima. This corresponds to the unified quantum mechanical structure of La-[B<sub>2</sub>@B<sub>18</sub>]-La which is illustrated in Figures 2 and S4. It has D<sub>9h</sub> symmetry (instead of C<sub>2h</sub> for the individual GMs).

From SI III, eqn. (15), it follows that the eigenstates of La-[B<sub>2</sub>@B<sub>18</sub>]-La should have two quantum numbers, namely for the energy and for the IRREP. By analogy with the results of Ref. [16], we can identify the previous quantum number  $m$  with two quantum numbers

$$m = (l, n) \tag{23}$$

where  $l$  denotes the energy band, and  $n$  labels the IRREP  $\Gamma_n$  of the cyclic group C<sub>18</sub>(M). The IRREP  $\Gamma_n$  of the wavefunction  $\Psi_m(\varphi) \equiv \Psi_{l,n}(\varphi)$  can be determined by means of the rule (cf. Ref. [15], eqn. (35))

$$\Gamma_n \leftrightarrow g \Psi_{l,n}(\varphi) = \epsilon^n \Psi_{l,n}(\varphi) \tag{24}$$

where  $\epsilon = \exp(-2\pi i/18)$ , cf. eqn. (13). For example, the wavefunctions which are shown in Figure S5 have

$$\begin{aligned} g \Psi_{m=0}(\varphi) &\equiv g \Psi_{l=0,n=0}(\varphi) = \Psi_{l=0,n=0}(\varphi) = \epsilon^0 \Psi_{l=0,n=0}(\varphi) \leftrightarrow \text{IRREP } \Gamma_{n=0} \\ g \Psi_{m=18}(\varphi) &\equiv g \Psi_{l=1,n=9}(\varphi) = -\Psi_{l=1,n=9}(\varphi) = \epsilon^9 \Psi_{l=1,n=9}(\varphi) \leftrightarrow \text{IRREP } \Gamma_{n=9} \\ g \Psi_{m=36}(\varphi) &\equiv g \Psi_{l=2,n=0}(\varphi) = \Psi_{l=2,n=0}(\varphi) = \epsilon^0 \Psi_{l=2,n=0}(\varphi) \leftrightarrow \text{IRREP } \Gamma_{n=0} \\ g \Psi_{m=53}(\varphi) &\equiv g \Psi_{l=2,n=9}(\varphi) = -\Psi_{l=2,n=9}(\varphi) = \epsilon^9 \Psi_{l=2,n=9}(\varphi) \leftrightarrow \text{IRREP } \Gamma_{n=9}. \end{aligned} \tag{25}$$

The assignments of the IRREPs of the eigenfunctions correlates with unique sets of non-zero coefficients in the expansion (21). For example,  $\Psi_{m=0}$  and  $\Psi_{m=36}$  have non-zero coefficients  $c_{ml}$ , for  $l = \dots, -36, -18, 0, 18, 36, \dots$ , whereas  $\Psi_{m=18}$  and  $\Psi_{m=53}$  have non-zero coefficients  $c_{ml}$ , for  $l = \dots, -27, -9, 9, 27, \dots$

A complete list of all assignments of quantum numbers (23) is in Table S3. Accordingly, the eighteen eigenfunctions in each band have different IRREPs  $\Gamma_{n=0}, \Gamma_{n=1}, \Gamma_{n=2}, \dots, \Gamma_{n=17}$ . This has enormous consequences. Namely, according to eqns. (5) and (21), the total wavefunctions consist of the spatial wave functions  $\Psi_{l,n}(\varphi)$  with IRREP  $\Gamma_n$  times nuclear spin wave functions  $\Psi_{n'}$ , with IRREP  $\Gamma_{n'}$ , where  $n' = 9 - n$  (for  $n = 0, 1, \dots, 9$ ) or  $n' = 27 - n$  (for  $n = 10, 11, \dots, 17$ ). This is the only way to satisfy the anti-symmetry of the total wave function, in accord with  $g \Psi_{\text{total}} = \epsilon^n \epsilon^{9-n} \Psi_{\text{total}} = \epsilon^9 \Psi_{\text{total}} = -\Psi_{\text{total}}$  (or  $= \epsilon^n \epsilon^{27-n} \Psi_{\text{total}} = \epsilon^{27} \Psi_{\text{total}} =$

$-\Psi_{\text{total}}$ ), cf. eqn. (5). In each energy band, all wavefunctions belong, therefore, to different nuclear spin isomers. This implies that it is impossible to prepare superpositions of eigenfunctions which belong to the same energy band. As consequence, it is impossible to prepare wavefunctions which are localized in individual potential wells supporting individual GMs of La-[B<sub>2</sub>@B<sub>18</sub>]-La. Hence the oriented tubular molecular rotor La-[B<sub>2</sub>@B<sub>18</sub>]-La will never be observed as GM.

**SI V: The effective moment of inertia  $I_{\text{eff}}$  of the rotation of the molecular wheel in the pseudo-rotating tubular bearing of the oriented rotor La-[B<sub>2</sub>@B<sub>18</sub>]-La**

This chapter presents two complementary approaches to the effective moment of inertia  $I_{\text{eff}}$  which is used in the Schrödinger eqn. (16) (cf. eqns. (17)-(19)) for the calculation of the rotational/pseudo-rotational eigenstates of the oriented tubular rotor La-[B<sub>2</sub>@B<sub>18</sub>]-La. The two approaches involve different approximations. At the end, we shall compare the results.

The first approach considers the local dynamics of the tubular rotor when it passes through one of its global minimum structures, say GM<sub>k</sub> at  $\varphi_k$ , or alternatively when it crosses one of its transition states, say TS<sub>k,k+1</sub> at  $\varphi_{k,k+1}$ . The potential energy curve at  $\varphi_k$  is approximately harmonic,

$$V(\varphi) \approx 0.5 k_{\varphi}^{\text{GM}} (\varphi - \varphi_k)^2 \quad (26)$$

with force constant

$$k_{\varphi}^{\text{GM}} = d^2V/d\varphi^2|_{\varphi=\varphi_k} = 0.5 * 18^2 * V_b. \quad (27)$$

This angular force constant is equal to the effective moment of inertia  $I_{\text{eff}}$  times the square of the frequency of the vibration which induces the path from GM<sub>k</sub> to the neighboring TS<sub>k-1,k</sub> and TS<sub>k,k+1</sub> - in the present case, this is approximately the normal mode labeled  $\nu^{\text{GM}}=8$  with  $\hbar\omega_8^{\text{GM}} = 234.79 \text{ h c cm}^{-1}$ , cf. Table S1,

$$k_{\varphi}^{\text{GM}} = I_{\text{eff}}^{\text{GM}} * (\omega_8^{\text{GM}})^2. \quad (28)$$

Eqns. (27), (28) yield

$$I_{\text{eff}}^{\text{GM}} = k_{\varphi}^{\text{GM}} / (\omega_8^{\text{GM}})^2 = 0.5 * 18^2 V_b / (\omega_8^{\text{GM}})^2 = 59.38 \text{ u}\text{\AA}^2. \quad (29)$$

Likewise, one can use the harmonic approximation of  $V(\varphi)$  at a transition state, say  $\text{TS}_{k,k+1}$  at  $\varphi_{k,k+1}$

$$V(\varphi) \approx V_b - 0.5 k_{\varphi}^{\text{TS}} (\varphi - \varphi_{k,k+1})^2 \quad (30)$$

with negative force constant -  $k_{\varphi}^{\text{TS}} < 0$  for the vibration which induces the path from  $\text{TS}_{k,k+1}$  to the neighboring  $\text{GM}_k$  and  $\text{GM}_{k+1}$  – this is approximately the normal mode with imaginary frequency,  $|\hbar\omega_i^{\text{TS}}| = 217.84 \text{ h c cm}^{-1}$ . The corresponding result is

$$I_{\text{eff}}^{\text{TS}} = |k_{\varphi}^{\text{TS}}| / |\omega_i^{\text{TS}}|^2 = 0.5 * 18^2 V_b / |\omega_i^{\text{TS}}|^2 = 68.98 \text{ u}\text{\AA}^2. \quad (31)$$

The results (29), (31) of this first approach suggest that  $I_{\text{eff}}$  is of the order 60-70  $\text{u}\text{\AA}^2$ .

The second approach calculates  $I_{\text{eff}}$  as sum of two contributions,

$$I_{\text{eff}} = I_{\text{rot}} + I_{\text{psr}}, \quad (32)$$

where

$$I_{\text{rot}} = m_B (R_{19}^{\text{GM}})^2 + m_B (R_{20}^{\text{GM}})^2 \quad (33)$$

is moment of inertia for the rotation of the wheel in the tubular bearing, and  $I_{\text{psr}}$  represents the effect of the pseudo-rotating nuclei of the bearing. The values of the radial nuclear coordinates of the boron nuclei of the wheel ( $i = 19, 20$ ) yield

$$I_{\text{rot}} = 14.73 \text{ u}\text{\AA}^2. \quad (34)$$

Comparison of eqns. (29), (31) and (32), (34) reveals that  $I_{\text{rot}}$  is much smaller than  $I_{\text{eff}}$ . This suggests that the main contribution to the effective moment of inertia is not due to the rotation of the wheel, but to the pseudo-rotations of the 18 nuclei of the tubular bearing. For a rough estimate of  $I_{\text{psr}}$ , let us consider as a reference the limiting case where those nuclei move on smooth ellipsoidal pseudo-rotational paths. The coordinates listed in Table S2a yield radial variations  $2 \Delta R_{\text{bearing}}$  from 2.2426 $\text{\AA}$  to 2.6476 $\text{\AA}$ , angular variations  $\Delta\varphi_{\text{bearing}}$  of  $\pm 1.9456^\circ$ , and variations  $2 \Delta Z_{\text{bearing}}$  along  $z$  from 0.6743  $\text{\AA}$  to 0.8718  $\text{\AA}$ . By analogy with eqn. (33), we obtain the lower limit

$$I_{\text{psr}} > 18 m_B * 4 [\Delta R_{\text{bearing}}^2 + (R_{\text{bearing}} \Delta\varphi_{\text{bearing}})^2 + \Delta Z_{\text{bearing}}^2]$$



$$\begin{aligned}
&= 18 * 11.009 * 4 * [0.2025^2 + (2.3574*0.03396)^2 + 0.09875^2] \text{ u}\text{\AA}^2 \\
&= 18 * 11.009 * 4 * 0.05716 \text{ u}\text{\AA}^2 = 45.31 \text{ u}\text{\AA}^2.
\end{aligned} \tag{35}$$

The factor 4 accounts for the fact that a full rotational cycle of the the nuclei of the molecular wheel is associated with two pseudo-rotational cycles of the nuclei of the tubular bearing.

Comparison of eqns. (32), (34), (35) confirms that  $I_{\text{eff}}$  is dominated by the effects of the tubular bearing, not by the wheel. Most important for the pseudo-rotational contribution  $I_{\text{psr}}$  to  $I_{\text{eff}}$  are the radial motions of the nuclei of the bearing, whereas motions along  $\varphi$  and  $z$  are less efficient.

The reference value  $(14.73 + 45.31 = 60.04) \text{ u}\text{\AA}^2$  of the sum  $I_{\text{rot}} + I_{\text{psr}} = I_{\text{eff}}$  obtained by the second approach agrees well with the estimate  $I_{\text{eff}}^{\text{GM}} = 59.38 \text{ u}\text{\AA}^2$  derived by the first approach. It is, therefore, fair to say that the two approaches support each other, in spite of the different approximations. One should keep in mind, however, that the result of the second approach has been estimated for the ideal scenario of ellipsoidal pseudo-rotational paths. Figure S4 shows, however, that the paths have various turns. These cause retardations and accelerations which tend to increase the value of  $I_{\text{eff}}$ . Hence, we use the larger value  $I_{\text{eff}}^{\text{TS}} = 68.98 \text{ u}\text{\AA}^2$  as effective moment of inertia, cf. eqn. (31), whereas the estimate  $I_{\text{eff}}^{\text{GM}} = 59.38 \text{ u}\text{\AA}^2$  in eqn. (29) is considered as lower limit. The preference of the value of  $I_{\text{eff}}$  at the transition state is also confirmed by the corresponding vector arrow plots of the  $b_g$  normal mode at the TSs, which serve as better tangents to the pseudo-rotational path than the  $b_g$  mode at the GMs, cf. SI VIII.

### **SI VI: The nuclear coordinates of 18 equivalent global minimum structures and 18 transition states of the oriented tubular rotor La-[B<sub>2</sub>@B<sub>18</sub>]-La**

This Section consists of six parts: **SI VI-A** specifies the nuclear coordinates of the reference global minimum structure GM<sub>1</sub> of the oriented tubular rotor La-[B<sub>2</sub>@B<sub>18</sub>]-La, in the laboratory frame. Here the nuclei are labeled by  $i = 1, \dots, 22$ , with  $i = 1, \dots, 18$  for the boron nuclei of the tubular bearing,  $i = 19, 20$  for the boron nuclei of the molecular wheel, and  $i = 21, 22$  for the metal nuclei. **SI VI-B** has the nuclear coordinates of the boron nuclei of the wheel and of the metal nuclei, for all GM<sub>k</sub>,  $k=1, \dots, 18$ . **SI VI-C** presents the nuclear coordinates of the eighteen nuclei of the tubular bearing for all GMs. Sub-sections **SI VI-D**, **SI VI-E** and **SI VI-F** are for the nuclear coordinates of the transition states, analogous to **SI VI-A**, **SI VI-B** and **SI VI-C** for the GMs. Specifically, **SI VI-D** has the nuclear coordinates of the reference TS<sub>18,1</sub>, **SI VI-B** has the nuclear

coordinates of the boron nuclei of the wheel and of the metal nuclei, for all  $\text{TS}_{k,k+1}$ ,  $k=18, 1, \dots, 17$ , and **SI VI-C** presents the nuclear coordinates of the eighteen nuclei of the tubular bearing for all TSs.

**SI VI-A: The nuclear coordinates of the reference global minimum structure  $\text{GM}_1$  of the oriented tubular rotor  $\text{La}[\text{B}_2@ \text{B}_{18}]\text{-La}$**

The nuclear coordinates of  $\text{GM}_1$  of  $\text{La}[\text{B}_2@ \text{B}_{18}]\text{-La}$  are expressed conveniently in terms of cylindrical coordinates, in the laboratory frame. Accordingly, the boron nuclei of the wheel ( $i=19,20$ ) are at ( $R_{19}^{\text{GM}} = 0.8177 \text{ \AA}$ ,  $\Phi_{19}^{\text{GM}} = \varphi_1 = 10^\circ$ ,  $Z_{19}^{\text{GM}} = -0.0017 \text{ \AA}$ ) and ( $R_{20}^{\text{GM}} = R_{19}^{\text{GM}}$ ,  $\Phi_{20}^{\text{GM}} = \Phi_{19}^{\text{GM}} + 180^\circ$ ,  $Z_{20}^{\text{GM}} = -Z_{19}^{\text{GM}}$ ). The nuclear coordinates of the two metal atoms ( $i=21,22$ ) are ( $R_{21}^{\text{GM}} = 0 \text{ \AA}$ ,  $\Phi_{21}^{\text{GM}} = 0^\circ$ ,  $Z_{21}^{\text{GM}} = 2.3981 \text{ \AA}$ ) and ( $R_{22}^{\text{GM}} = 0 \text{ \AA}$ ,  $\Phi_{22}^{\text{GM}} = 0^\circ$ ,  $Z_{22}^{\text{GM}} = -Z_{21}^{\text{GM}}$ ), with arbitrary and irrelevant values of  $\Phi_{21}^{\text{GM}}$  and  $\Phi_{22}^{\text{GM}}$ . The cylindrical coordinates of the nuclei of the tubular bearing ( $i=1-18$ ) are specified using the notation ( $R_i^{\text{GM}}$ ,  $\Phi_i + \Delta\Phi_i^{\text{GM}}$ ,  $Z_i^{\text{GM}}$ ). Here we set  $\Phi_1 = 10^\circ$ ,  $\Phi_2 = 30^\circ$ ,  $\Phi_3 = 50^\circ$ , ...,  $\Phi_{18} = 350^\circ$ , with equal angular spacings of  $20^\circ$ ; these angles  $\Phi_i$  are called “the reference angles” – this is the abbreviated version of the explicit but lengthy term “the reference angles of the nuclei labeled  $i$  of the bearing of the reference  $\text{GM}_1$ ”. The  $\Delta\Phi_i^{\text{GM}}$  are the deviations of the cylindrical angles from  $\Phi_i$ . The fixation of the reference angles implies orientation of the scaffold of the bearing in the laboratory, except for the small deviations  $\Delta\Phi_i^{\text{GM}}$ . The azimuthal angle  $\varphi$  of the wheel with respect to the bearing can then be interpreted as the angle between the laboratory x-axis and the projection of the wheel on the x-y-plane.

The nuclear point group  $C_{2h}$  of  $\text{GM}_1$  implies the following symmetry rules for the cylindrical coordinates (these rules are to be applied cyclically, that means modulo 18):

$$R_{1+\lambda}^{\text{GM}} = R_{10-\lambda}^{\text{GM}} = R_{10+\lambda}^{\text{GM}} = R_{19-\lambda}^{\text{GM}}, \lambda = 0, \dots, 4;$$

$$\text{(this means } R_1^{\text{GM}} = R_{10}^{\text{GM}}, R_2^{\text{GM}} = R_9^{\text{GM}} = R_{11}^{\text{GM}} = R_{18}^{\text{GM}}, R_3^{\text{GM}} = R_8^{\text{GM}} = R_{12}^{\text{GM}} = R_{17}^{\text{GM}}, R_4^{\text{GM}} = R_7^{\text{GM}} = R_{13}^{\text{GM}} = R_{16}^{\text{GM}}, R_5^{\text{GM}} = R_6^{\text{GM}} = R_{14}^{\text{GM}} = R_{15}^{\text{GM}}.)$$

$$\Delta\Phi_{1+\lambda}^{\text{GM}} = -\Delta\Phi_{10-\lambda}^{\text{GM}} = \Delta\Phi_{10+\lambda}^{\text{GM}} = -\Delta\Phi_{19-\lambda}^{\text{GM}}, \lambda = 0, \dots, 4;$$

$$\text{(this means } \Delta\Phi_1^{\text{GM}} = \Delta\Phi_{10}^{\text{GM}} = 0^\circ, \Delta\Phi_2^{\text{GM}} = -\Delta\Phi_9^{\text{GM}} = \Delta\Phi_{11}^{\text{GM}} = -\Delta\Phi_{18}^{\text{GM}}, \Delta\Phi_3^{\text{GM}} = -\Delta\Phi_8^{\text{GM}} = \Delta\Phi_{12}^{\text{GM}} = \Delta\Phi_{17}^{\text{GM}}, \Delta\Phi_4^{\text{GM}} = -\Delta\Phi_7^{\text{GM}} = \Delta\Phi_{13}^{\text{GM}} = -\Delta\Phi_{16}^{\text{GM}}, \Delta\Phi_5^{\text{GM}} = -\Delta\Phi_6^{\text{GM}} = \Delta\Phi_{14}^{\text{GM}} = -\Delta\Phi_{15}^{\text{GM}}.)$$

and

$$Z_{1+\lambda}^{\text{GM}} = -Z_{10-\lambda}^{\text{GM}} = -Z_{10+\lambda}^{\text{GM}} = Z_{19-\lambda}^{\text{GM}}.$$

$$\begin{aligned} & \text{(this means } Z_1^{\text{GM}} = -Z_{10}^{\text{GM}}, Z_2^{\text{GM}} = -Z_9^{\text{GM}} = -Z_{11}^{\text{GM}} = Z_{18}^{\text{GM}}, Z_3^{\text{GM}} = -Z_8^{\text{GM}} = \\ & -Z_{12}^{\text{GM}} = Z_{17}^{\text{GM}}, Z_4^{\text{GM}} = -Z_7^{\text{GM}} = -Z_{13}^{\text{GM}} = Z_{16}^{\text{GM}}, Z_5^{\text{GM}} = -Z_6^{\text{GM}} = -Z_{14}^{\text{GM}} = \\ & Z_{15}^{\text{GM}}.) \end{aligned} \quad (36)$$

The values of the cylindrical coordinates ( $R_i^{\text{GM}}, \Delta\Phi_i^{\text{GM}}, Z_i^{\text{GM}}$ ) of the nuclei of the bearing of  $\text{GM}_1$  of  $\text{La}_2[\text{B}_2@B_{18}]$ ,  $i=1, \dots, 18$  are listed in Table S2a. The quantum chemical results are obtained at the PBE0<sup>33</sup> level with the 6-311+G(d)<sup>34</sup> basis set for B and the Stuttgart relativistic small-core pseudopotential for  $\text{La}$ <sup>35,36</sup> using the Gaussian 09 program.<sup>37</sup> The PBE0 results are in perfect agreement with the symmetry rule (36).

### SI VI-B: The coordinates of the boron nuclei of the molecular wheel and of the metal nuclei for 18 equivalent global minimum structures of the oriented tubular rotor $\text{La}[\text{B}_2@B_{18}]\text{-La}$

The cylindrical coordinates of the nuclei of the molecular wheel ( $i = 19, 20$ ) and of the metal atoms ( $i = 21, 22$ ) for arbitrary global minima  $\text{GM}_k$  ( $k = 1, \dots, 18$ ) of  $\text{La}[\text{B}_2@B_{18}]\text{-La}$  are

$$\begin{aligned} & (R_{19}^{\text{GM}} = 0.8177 \text{ \AA}, \Phi_{19}^{\text{GM}} = \varphi_k = -10^\circ + k \cdot 20^\circ, Z_{19}^{\text{GM}} = (-1)^k \cdot 0.0117 \text{ \AA}), \\ & (R_{20}^{\text{GM}} = R_{19}^{\text{GM}}, \Phi_{20}^{\text{GM}} = \Phi_{19}^{\text{GM}} + 180^\circ, Z_{20}^{\text{GM}} = -Z_{19}^{\text{GM}}), \\ & (R_{21}^{\text{GM}} = 0 \text{ \AA}, \Phi_{21}^{\text{GM}} = 0^\circ, Z_{21}^{\text{GM}} = 2.3981 \text{ \AA}) \\ & (R_{22}^{\text{GM}} = 0 \text{ \AA}, \Phi_{22}^{\text{GM}} = 0^\circ, Z_{22}^{\text{GM}} = -Z_{21}^{\text{GM}}) \text{ for } \text{GM}_k. \end{aligned} \quad (37)$$

In other words, when proceeding from  $\text{GM}_k$  to  $\text{GM}_{k+1}$ , then the azimuthal angle  $\varphi$  of the wheel increases by  $20^\circ$ , its diameter is robust, and the position of its nucleus 19 changes from slightly below (above) to slightly above (below) the x-y-plane, and *vice versa* for nucleus 20. The metal nuclei keep the same positions on the rotational axis, for all GMs.

### SI VI-C: The coordinates of the boron nuclei of the tubular bearing for 18 equivalent global minimum structures of the oriented tubular rotor $\text{La}[\text{B}_2@B_{18}]\text{-La}$

In Subsection SI VI-A we have specified the cylindrical coordinates of the boron nuclei labeled  $i=1, 2, \dots, 18$  of the tubular bearing of the reference global

minimum structure  $GM_{k=1}$  of the oriented La-[B<sub>2</sub>@B<sub>18</sub>]-La, see also Figures 1, S1 and Table S2a.

The goal of this Subsection **SI VI-C** is to derive the cylindrical coordinates of the boron nuclei in tubular bearings of all GMs. For this purpose, it is helpful (a) recognize that the nuclear coordinates of  $GM_{k=1}$  are just a special case of a more general expression, ready for applications to all other GMs. Next we shall consider two examples (similar to Section **SI II**), namely (b) first the nuclear coordinates of  $GM_3$  and (c) then those of  $GM_2$ . Finally (d) the compact general expression for the cylindrical coordinates of the nuclei  $i = 1, 2, \dots, 18$  in the global minimum  $GM_k$  with arbitrary label  $i$  will be extrapolated.

(a) For  $GM_{k=1}$ , the cylindrical coordinates of the nuclei  $i=1, 2, \dots, 18$  of the bearing can be written in compact notation as

$$G_{i,i} = (R_i^{GM}, \Phi_i + \Delta\Phi_i^{GM}, Z_i^{GM}). \quad (38)$$

(The letter “G” reminds of “G-lobal minimum”.) It is rewarding that eqn. (38) may be recognized as special case of the general expression

$$\begin{aligned} G_{19-k+i,i} &= (R_{19-k+i}^{GM}, \Phi_i + \Delta\Phi_{19-k+i}^{GM}, (-1)^{k-1} Z_{19-k+i}^{GM}) \\ &\equiv (R_{1-k+i}^{GM}, \Phi_i + \Delta\Phi_{1-k+i}^{GM}, (-1)^{k-1} Z_{1-k+i}^{GM}). \end{aligned} \quad (39)$$

The first subscript  $19-k+i$  of  $G_{19-k+i,i}$  depends on  $k$  and  $i$ , where the label  $k$  specifies the GM (here  $k=1$  for  $GM_{k=1}$ ), and  $i$  specifies the reference angle  $\Phi_i$  of the nucleus of the bearing. The subscripts “ $19-k+i$ ” or “ $1-k+i$ ” are applied modulo 18, that means in a cyclic manner,  $(19-k+i) \bmod 18 = (1-k+i) \bmod 18$ . The second subscript  $i$  of  $G_{19-k+i,i}$  specifies the reference angle  $\Phi_i$ .

(b) As explained for the first example which has been discussed in Section **SI II**,  $GM_{k=3}$  can be generated by rotation  $g_r^{-2}$  of  $GM_{k=1}$  by  $2*20^\circ (+ 2*180^\circ)$ . This way, the labels  $i=1,2,3,4,\dots,18$  of the nuclei in  $GM_1$  are replaced by the labels  $17,18,1,2,\dots,16$  in  $GM_{k=3}$ , respectively, cf. Figure 1. As consequence, for example the cylindrical coordinates  $G_{1,1}^{GM} = (R_1^{GM}, \Phi_1 + \Delta\Phi_1^{GM}, Z_1^{GM})$  of the nucleus  $i=1$  in  $GM_1$  at the reference angle  $\Phi_{i=1}$  are replaced by the coordinates  $G_{17,1}^{GM} = (R_{17}^{GM}, \Phi_1 + \Delta\Phi_{17}^{GM}, Z_{17}^{GM})$  of the nucleus 17 in  $GM_{k=3}$ . It is rewarding that this can be rewritten in terms of the general expression (39) as  $G_{19-k+1,i=1} = (R_{19-k+1}^{GM}, \Phi_{i=1} + \Delta\Phi_{19-k+1}^{GM}, (-1)^{k-1} Z_{19-k+1}^{GM})$  for  $k=3$ . Likewise, the nuclei  $i = 17, 18, 1, 2, \dots, 16$  in  $GM_{k=3}$  have new coordinates  $G_{19-k+i,i} = (R_{19-k+i}^{GM}, \Phi_i + \Delta\Phi_{19-k+i}^{GM}, (-1)^{k-1} Z_{19-k+i}^{GM})$ .

(c) According to the second example which has been discussed in Section **SI II**,  $GM_{k=2}$  can be generated by rotation  $g_{R\sim}$  of  $GM_{k=1}$  by  $20^\circ + 180^\circ = 200^\circ$ , accompanied with the permutation  $g_{(19\ 20)\sim}$  of the nuclear labels of the wheel. This way, the labels  $i = 1, 2, \dots, 10, 11, \dots, 18$  of the nuclei in  $GM_1$  are replaced by the labels  $9, 10, \dots, 18, 1, \dots, 8$  in  $GM_{k=2}$ , respectively, cf. Figure 1. As consequence, the cylindrical coordinates  $G_{1,1} = (R_1^{GM}, \Phi_1 + \Delta\Phi_1^{GM}, Z_1^{GM})$  of the nucleus  $i=1$  in  $GM_1$  at the reference angle  $\Phi_{i=1}^{GM}$  are replaced by the coordinates  $(R_9^{GM}, \Phi_1 + \Delta\Phi_9^{GM}, Z_9^{GM})$  of the nucleus 9 in  $GM_{k=2}$ . The symmetry relations (36) imply, however, that these coordinates are the same as  $(R_{18}^{GM}, \Phi_1 + \Delta\Phi_{18}^{GM}, -Z_{18}^{GM})$ . Again, it is rewarding that this can be rewritten in terms of the general expression (39) as  $G_{19-k+1,i} = (R_{19-k+1}^{GM}, \Phi_{i=1} + \Delta\Phi_{19-k+1}^{GM}, (-1)^{k-1} Z_{19-k+1}^{GM})$  for  $k=2$ . Likewise, the nuclei  $i = 9, 10, \dots, 18, 1, \dots, 8$  in  $GM_{k=2}$  at the reference angles  $\Phi_1, \Phi_2, \dots, \Phi_{10}, \Phi_{11}, \dots, \Phi_{18}$  have new coordinates  $G_{19-k+i,i} = (R_{19-k+i}^{GM}, \Phi_i + \Delta\Phi_{19-k+i}^{GM}, (-1)^{k-1} Z_{19-k+i}^{GM})$ .

(d) Extrapolation of the results for the examples (a) - (c) to all other global minimum structures yields the general result, eqn. (39). The corresponding cylindrical coordinates of all the nuclei in the bearings of all GMs are listed in Table S2b.

The compact rule (39) has been derived by means of various results of the previous Sections **SI II** and **SI VI-A**. In particular,  $GM_k$  is generated by application of the operator  $g^{\sim k-1}$ , equivalent to (but different from)  $g^{k-1}$ , on the reference  $GM_1$ . This implies the permutation  $g_p^{k-1}$  of the nuclear labels  $1, 2, 3, \dots, 18$  in the bearing of  $GM_1$  to new labels in  $GM_k$ , as documented in Figures 1, S1 and also in Tables S1, S2a. The symmetry relations (36) which are based on the  $C_{2h}$  symmetry of the reference  $GM_1$  of  $La-[B_2@B_{18}]-La$  then allow to express the new cylindrical coordinates of the nuclei at the reference angles  $\Phi_i$  of the tubular bearings of all  $GM_k$  by the compact rule (39).

#### **SI VI-D: The nuclear coordinates of the reference transition state $TS_{18,1}$ of the oriented tubular rotor $La-[B_2@B_{18}]-La$**

The nuclear coordinates of  $TS_{18,1}$  (like those of  $GM_1$ ) of  $La-[B_2@B_{18}]-La$  are expressed conveniently in terms of cylindrical coordinates. Accordingly, the boron nuclei of the wheel ( $i=19,20$ ) are at  $(R_{19}^{TS} = 0.8182 \text{ \AA}, \Phi_{19}^{TS} = \varphi_{18,1} = 0^\circ, Z_{19}^{TS} = 0 \text{ \AA})$  and  $(R_{20}^{TS} = R_{19}^{TS}, \Phi_{20}^{TS} = \Phi_{19}^{TS} + 180^\circ, Z_{20}^{TS} = 0 \text{ \AA})$ . The nuclear coordinates of the two metal atoms ( $i=21,22$ ) are  $(R_{21}^{TS} = 0 \text{ \AA}, \Phi_{21}^{TS} = 0^\circ, Z_{21}^{TS}$

= 2.3916 Å) and ( $R_{22}^{\text{TS}} = 0$  Å,  $\Phi_{22}^{\text{TS}} = 0^\circ$ ,  $Z_{22}^{\text{TS}} = -Z_{21}^{\text{TS}}$ ), with arbitrary and irrelevant values of  $\Phi_{21}^{\text{TS}}$  and  $\Phi_{22}^{\text{TS}}$ .

The cylindrical coordinates of the nuclei of the bearing ( $i=1-18$ ) are specified using the notation ( $R_i^{\text{TS}}$ ,  $\Phi_i + \Delta\Phi_i^{\text{TS}}$ ,  $Z_i^{\text{TS}}$ ), with the same “reference angles”  $\Phi_i$  as for GM<sub>1</sub>. The  $\Delta\Phi_i^{\text{TS}}$  are the deviations of the cylindrical angles from  $\Phi_i$ . Note that the labels  $i=1-18$  for the reference angles coincide with the labels of the nuclei  $i=1-18$  in the reference global minimum structure GM<sub>1</sub>. This coincidence yields compact expressions for the coordinates of all nuclei of all transition states, analogous to those for the global minima, and this is the reason for identifying the nuclear labels of TS<sub>18,1</sub> with those of GM<sub>1</sub>. For comparison, the alternative choice namely identifying the nuclear labels of TS<sub>18,1</sub> with those of GM<sub>18</sub> would not allow this formal analogy.

The nuclear point group C<sub>2h</sub> of TS<sub>18,1</sub> implies the following symmetry rules for the cylindrical coordinates (these rules are applied cyclically, that means modulo 18):

$$R_{5-\lambda}^{\text{TS}} = R_{5+\lambda}^{\text{TS}} = R_{14-\lambda}^{\text{TS}} = R_{14+\lambda}^{\text{TS}}, \lambda = 0, \dots, 4;$$

(this means  $R_5^{\text{TS}} = R_{14}^{\text{TS}}$ ,  $R_4^{\text{TS}} = R_6^{\text{TS}} = R_{13}^{\text{TS}} = R_{15}^{\text{TS}}$ ,  $R_3^{\text{TS}} = R_7^{\text{TS}} = R_{12}^{\text{TS}} = R_{16}^{\text{TS}}$ ,  $R_2^{\text{TS}} = R_8^{\text{TS}} = R_{11}^{\text{TS}} = R_{17}^{\text{TS}}$ ,  $R_1^{\text{TS}} = R_9^{\text{TS}} = R_{10}^{\text{TS}} = R_{18}^{\text{TS}}$ .)

$$\Delta\Phi_{5-\lambda}^{\text{TS}} = -\Delta\Phi_{5+\lambda}^{\text{TS}} = \Delta\Phi_{14-\lambda}^{\text{TS}} = -\Delta\Phi_{14+\lambda}^{\text{TS}}, \lambda = 0, \dots, 4;$$

(this means  $\Delta\Phi_5^{\text{TS}} = \Delta\Phi_{14}^{\text{TS}} = 0^\circ$ ,  $\Delta\Phi_4^{\text{TS}} = -\Delta\Phi_6^{\text{TS}} = \Delta\Phi_{13}^{\text{TS}} = -\Delta\Phi_{15}^{\text{TS}}$ ,  $\Delta\Phi_3^{\text{TS}} = -\Delta\Phi_7^{\text{TS}} = \Delta\Phi_{12}^{\text{TS}} = -\Delta\Phi_{16}^{\text{TS}}$ ,  $\Delta\Phi_2^{\text{TS}} = -\Delta\Phi_8^{\text{TS}} = \Delta\Phi_{11}^{\text{TS}} = -\Delta\Phi_{17}^{\text{TS}}$ ,  $\Delta\Phi_1^{\text{TS}} = -\Delta\Phi_9^{\text{TS}} = \Delta\Phi_{10}^{\text{TS}} = -\Delta\Phi_{18}^{\text{TS}}$ .)

and

$$Z_{5-\lambda}^{\text{TS}} = Z_{5+\lambda}^{\text{TS}} = -Z_{14-\lambda}^{\text{TS}} = -Z_{14+\lambda}^{\text{TS}}, \lambda = 0, \dots, 4.$$

(this means  $Z_5^{\text{TS}} = -Z_{14}^{\text{TS}}$ ,  $Z_4^{\text{TS}} = Z_6^{\text{TS}} = -Z_{13}^{\text{TS}} = -Z_{15}^{\text{TS}}$ ,  $Z_3^{\text{TS}} = Z_7^{\text{TS}} = -Z_{12}^{\text{TS}} = -Z_{16}^{\text{TS}}$ ,  $Z_2^{\text{TS}} = Z_8^{\text{TS}} = -Z_{11}^{\text{TS}} = -Z_{17}^{\text{TS}}$ ,  $Z_1^{\text{TS}} = Z_9^{\text{TS}} = -Z_{10}^{\text{TS}} = -Z_{18}^{\text{TS}}$ .) (40)

The values of the cylindrical coordinates ( $R_i^{\text{TS}}$ ,  $\Delta\Phi_i^{\text{TS}}$ ,  $Z_i^{\text{TS}}$ ) of the nuclei of the bearing of TS<sub>18,1</sub> of La<sub>2</sub>[B<sub>2</sub>@B<sub>18</sub>],  $I = 1, \dots, 18$  are listed in Table S2b, adapted from Ref. [1]. They are in good but not in perfect agreement with the symmetry rule (40). For example, Table S2b has the value  $\Delta\Phi_5^{\text{TS}} = 0.0012^\circ$  instead of  $0^\circ$ , or the value of  $\Delta\Phi_4^{\text{TS}}$  is listed as  $1.1927^\circ$ , whereas  $-\Delta\Phi_6^{\text{TS}} = 1.1887^\circ$ , very close

to, but not the same as  $\Delta\Phi_4^{\text{TS}}$ . These small deviations are consequences of numerically imperfect rotations of the quantum chemical result for the TS in Ref. [1] to the present orientation, with the molecular wheel of  $\text{TS}_{18,1}$  at  $\varphi_{19} = 0^\circ$  and with the cylindrical axis perpendicular to the x-y-plane. The deviations are below the graphical resolution of the Figures for the presentations of the subsequent results, however, so we consider them as negligible.

**SI VI-E: The coordinates of the boron nuclei of the molecular wheel and of the metal nuclei for 18 equivalent transition states of the oriented tubular rotor La-[B<sub>2</sub>@B<sub>18</sub>]-La**

The cylindrical coordinates of the boron nuclei of the wheel ( $I = 19, 20$ ) and of the metal nuclei ( $I = 21, 22$ ) of  $\text{TS}_{k,k+1}$  ( $k=18,1,2,\dots,17$ ) are

$$\begin{aligned}
 (R_{19}^{\text{TS}} = 0.8182 \text{ \AA}, \Phi_{19}^{\text{TS}} = k*20^\circ, & \quad Z_{19}^{\text{TS}} = 0 \text{ \AA}), \\
 (R_{20}^{\text{TS}} = R_{19}^{\text{TS}}, \Phi_{20}^{\text{TS}} = \Phi_{19}^{\text{TS}} + 180^\circ, & \quad Z_{20}^{\text{TS}} = 0 \text{ \AA}), \\
 (R_{21}^{\text{TS}} = 0 \text{ \AA}, \Phi_{21}^{\text{TS}} = 0^\circ, & \quad Z_{21}^{\text{TS}} = 2.3916 \text{ \AA}) \\
 (R_{22}^{\text{TS}} = 0 \text{ \AA}, \Phi_{22}^{\text{TS}} = 0^\circ, & \quad Z_{22}^{\text{TS}} = -Z_{21}^{\text{TS}}) \text{ for } \text{TS}_{k,k+1},
 \end{aligned}
 \tag{41}$$

compare with eqn. (38) for the GMs. In other words, all TSs have the molecular wheel in the x-y-plane, with robust diameter, and when proceeding from  $\text{TS}_{k,k+1}$  to the next  $\text{TS}_{k+1,k+2}$ , then the azimuthal angle increases by  $20^\circ$ . The metal nuclei keep the same positions on the rotational axis, for all TSs.

**SI VI-F: The coordinates of the boron nuclei of the tubular bearing for 18 equivalent global transition states of the oriented tubular rotor La-[B<sub>2</sub>@B<sub>18</sub>]-La**

The goal of this Subsection is to provide the cylindrical coordinates of all nuclei in all TSs. For this purpose, it is convenient to assign the label “k” to the transition state  $\text{TS}_{k,k+1}$  ( $k=1,2,\dots,18 \text{ mod } 18$ , e.g.  $k=18$  for  $\text{TS}_{18,1}$ ). This choice is of course somewhat arbitrary: it reminds of the “preceding”  $\text{GM}_k$ , instead of the alternative label “k+1” of the “next”  $\text{GM}_{k+1}$ . We choose the label “k” because it allows reaching the goal. The derivation is analogous to that presented in Subsection **SI VI-C** for the cylindrical coordinates of the nuclei in all GMs. In particular, it exploits the  $C_{2h}$  symmetry rules (40) for the coordinates of the reference  $\text{TS}_{18,1}$ , analogous to the  $C_{2h}$  symmetry rules (38) for the coordinates of the reference  $\text{GM}_1$ . As result, the cylindrical coordinates of the nuclei of the

tubular bearing of  $\text{TS}_{k,k+1}$  at the reference angle  $\Phi_i$  are given by the compact and general expression

$$\begin{aligned} T_{18-k+i,i} &= (\mathbf{R}_{18-k+i}^{\text{TS}}, \Phi_i + \Delta\Phi_{18-k+i}^{\text{TS}}, (-1)^k Z_{18-k+i}^{\text{TS}}) \\ &\equiv (\mathbf{R}_{-k+i}^{\text{TS}}, \Phi_i + \Delta\Phi_{-k+i}^{\text{TS}}, (-1)^k Z_{-k+i}^{\text{TS}}) \end{aligned} \quad (42)$$

with the subscripts modulo 18, analogous to eqn. (39) for  $\text{GM}_k$ . (The letter ‘‘T’’ reminds of ‘‘transition state’’.) Applications of this rule to all boron nuclei  $i = 1, 2, \dots, 18$  in all TSs are listed in Table S2b

It is instructive to consider three examples of the rule (42) for the TSs, which correspond to the three applications (a), (b), (c) of the rule (39) to the GMs, as discussed in Subsection SI VI-C. (a) Gratifyingly, application of the rule (42) to the nuclei  $i=1,2,\dots,18$  of the reference  $\text{TS}_{18,1}$  ( $k=18$ ) reproduces its cylindrical coordinates  $T_{i,i} = (\mathbf{R}_i^{\text{TS}}, \Phi_i + \Delta\Phi_i^{\text{TS}}, Z_i^{\text{TS}})$ . (b) and (c): For the nuclei of the tubular bearing at the reference angle  $\Phi_i$  of the next neighboring transition states  $\text{TS}_{1,2}$  ( $k=1$ ) and  $\text{TS}_{2,3}$  ( $k=2$ ), the rule (42) yields the coordinates  $T_{17+i,i} = (\mathbf{R}_{17+i}^{\text{TS}}, \Phi_i + \Delta\Phi_{17+i}^{\text{TS}}, -Z_{17+i}^{\text{TS}})$  and  $(\mathbf{R}_{16+i}^{\text{TS}}, \Phi_i + \Delta\Phi_{16+i}^{\text{TS}}, Z_{16+i}^{\text{TS}})$ . The related permutations  $g_p$  and  $g_p^2$  imply that the labels of the nuclei 1, 2, ..., 18 of the ‘‘delivering’’  $\text{TS}_{18,1}$  are replaced in cyclic manner by (9,10,...,18,1,2,...,8) and by (17,18,1,2,...,16), as illustrated in Figure 1 and documented in Table S1.

## SI VII: The rotating molecular wheel in the pseudo-rotating tubular bearing of the oriented rotor $\text{La}[\text{B}_2@B_{18}]\text{-La}$

Until now, we have considered the generation of eighteen equivalent global minimum structures and eighteen equivalent transition states of the oriented  $\text{La}[\text{B}_2@B_{18}]\text{-La}$ , by multiple applications of the generators  $g$  or  $\tilde{g}$  to the reference  $\text{GM}_1$  or to the reference  $\text{TS}_{18,1}$ , respectively. The generator  $\tilde{g}$  invokes large amplitude motions of the individual nuclei of the tubular bearing, associated with permutation of the nuclear labels of the molecular wheel. For example, it rotates the rotor by  $20^\circ + 180^\circ$  about the cylindrical axis to its new position in the bearing of  $\text{GM}_2$ , cf. eqn. (7). In contrast, the generator  $g$  invokes small amplitude nuclear motions of the bearing, but these are associated with significant permutations of the nuclear labels, cf. eqn. (4). For example, it moves the nucleus of the bearing of  $\text{GM}_1$  labeled  $i=1$  from its position at cylindrical coordinates  $G_{1,1}$  to the neighboring coordinates  $G_{18,1}$  while permuting its label from 1 to 9, cf. Figure 1 and Tables S1, S2.



This Section introduces an equivalent generator  $\tilde{g}$  which achieves the same effect as  $g$  or  $\tilde{g}$ , but with small amplitude motions of the nuclei of the bearing, and without any permutations of the nuclei. This generator  $\tilde{g}$  implies a new mechanism for generating the cyclic sequence of alternating global minimum structures and transition states,  $TS_{18,1} \rightarrow GM_1 \rightarrow TS_{1,2} \rightarrow GM_2 \rightarrow \dots \rightarrow TS_{17,18} \rightarrow GM_{18} \rightarrow TS_{18,1}$  of the tubular rotor, namely generation by rotating the molecular wheel in the pseudo-rotating tubular bearing. Specifically,

**the generator  $\tilde{g} = \{g_r, g_{pr}\}$  consists of two operations, namely**

- $g_r$ : rotation of the molecular wheel in the tubular bearing by  $20^\circ$ ,

$$g_r: \varphi \rightarrow \varphi + 20^\circ$$

(same as  $g_r$  for the generator  $g$ , eqn. (4)) and

- $g_{pr}$  – this denotes the so-called “pseudo-rotation” of the nuclei of the bearing. Specifically, the nuclei at the reference angle  $\Phi_i$  keep their label  $i$ , but the coordinates  $G_{19-k+i,i} = (R_{19-k+i}^{GM}, \Phi_i + \Delta\Phi_{19-k+i}^{GM}, (-1)^{k-1} Z_{19-k+i}^{GM})$  in  $GM_k$  change to the coordinates  $G_{19-(k+1)+i,i} = (R_{19-(k+1)+i}^{GM}, \Phi_i + \Delta\Phi_{19-(k+1)+i}^{GM}, (-1)^k Z_{19-(k+1)+i}^{GM})$  in  $GM_{k+1}$ , cf. eqn. (39)

$$g_{pr} : G_{19-k+i,i} \rightarrow G_{19-(k+1)+i,i} \text{ for } GM_k \rightarrow GM_{k+1}, \text{ in particular}$$

$$g_{pr} : G_{i,i} \rightarrow G_{17+i,i} \text{ for } GM_1 \rightarrow GM_2.$$

Repeated applications  $g_{pr}^k$  of  $g_{pr}$  change the coordinates  $G_{i,i}$  in  $GM_1$  to  $G_{19-(k+1)+i,i}$  in  $GM_{k+1}$ ,

$$g_{pr}^k : G_{i,i} \rightarrow G_{19-(k+1)+i,i} \text{ for } GM_1 \rightarrow GM_{k+1}.$$

Likewise, the coordinates  $T_{18-k+i,i} = (R_{18-k+i}^{TS}, \Phi_i + \Delta\Phi_{18-k+i}^{TS}, (-1)^k Z_{18-k+i}^{TS})$  in  $TS_{k,k+1}$  change to the coordinates  $T_{18-(k+1)+i,i} = (R_{18-(k+1)+i}^{TS}, \Phi_i + \Delta\Phi_{18-(k+1)+i}^{TS}, (-1)^{k+1} Z_{18-(k+1)+i}^{TS})$  in  $TS_{k+1,k+2}$ , cf. eqn. (42),

$$g_{pr} : T_{18-k+i,i} \rightarrow T_{18-(k+1)+i,i} \text{ for } TS_{k,k+1} \rightarrow TS_{k+1,k+2}, \text{ in particular}$$

$$g_{pr} : T_{i,i} \rightarrow T_{17+i,i} \text{ for } TS_{18,1} \rightarrow TS_{1,2}.$$

Repeated applications  $g_{pr}^k$  of  $g_{pr}$  change the coordinates  $T_{i,i}$  in  $TS_{18,1}$  to

$T_{18-k+i,i}$  in  $TS_{k,k+1}$

$$g_{pr}^m : T_{i,i} \rightarrow T_{18-k+i,i} \text{ for } TS_{18,1} \rightarrow TS_{k,k+1}. \quad (43)$$

The subscripts in eqn. (43) are applied modulo 18.

The equivalence of the generator  $g^{\sim}$  and  $g$  or  $\tilde{g}$  means that they achieve the same effects. Thus multiple applications  $\tilde{g}^k$  or  $g^k$  of  $\tilde{g}$  or  $g$  transfer the reference  $GM_1$  and  $TS_{18,1}$  into  $GM_{k+1}$  and  $TS_{k,k+1}$ , respectively, with corresponding permutations of the nuclear labels, and with the associated changes of the nuclear coordinates (39) and (42), as listed in Table S2b. For comparison, multiple applications  $g^{\sim k}$  of  $g^{\sim}$  transfer the reference  $GM_1$  and  $TS_{18,1}$  into the same  $GM_{k+1}$  and  $TS_{k,k+1}$ , respectively, with the same shifts of the nuclear coordinates, but without any nuclear permutations. These effects are equivalent, irrespective of the permutations or non-permutations of the nuclear labels of the bearing, because the boron nuclei are indistinguishable, i.e. their labels do not matter. What matters is that the  $GM_{k+1}$  and  $TS_{k+1,k+2}$  are generated from the reference  $GM_1$  and from  $TS_{18,1}$  with eighteen boron nuclei at coordinates  $G_{19-(k+1)+i,i}$  or  $T_{18-(k+1)+i,i}$  in the bearing, respectively, irrespective of the nuclear labels. The suppression of any permutations of the nuclear labels means that the generator  $g^{\sim}$  moves the nuclei of the bearing of the reference  $GM_1$  such that they stay close to their reference angles  $\Phi_i$ .

The effects of multiple applications  $g^{\sim k}$  of  $g^{\sim}$  operating on  $GM_1$  or  $TS_{18,1}$  are illustrated in the rainbow-colored Figures S1 and S2, respectively. For each step of the wheel from  $\varphi_k$  or  $\varphi_{k,k+1}$  to  $\varphi_{k+1}$  or  $\varphi_{k+1,k+2}$ , the nuclei at the reference angles  $\Phi_i$  in the bearing move from their positions at  $G_{19-k+i,i}$  or  $T_{18-m+n,n}$  to  $G_{19-(k+1)+i,i}$  or  $T_{18-(k+1)+i,i}$ , respectively, without changing the nuclear labels. These nuclear motions in the bearing are called “pseudo-rotations”.

We shall now discuss some important properties of the model of the rotating wheel in the pseudo-rotating bearing. These properties are also documented in Figures 2 and S4, and they are confirmed by Table S2b when ignoring the labels of the nuclei at the reference angles  $\Phi_i$ .

- (a) Starting from the reference global minimum  $GM_1$  or from the reference transition state  $TS_{18,1}$ , eighteen applications of the rotational-pseudo-rotational generator  $g^{\sim}$  generate the cyclic sequences  $GM_1 \rightarrow GM_2 \rightarrow \dots \rightarrow GM_{18} \rightarrow GM_1$  or  $TS_{18,1} \rightarrow TS_{1,2} \rightarrow \dots \rightarrow TS_{17,18} \rightarrow TS_{18,1}$ , respectively. At the same time, the nuclei of the molecular wheel move

along a full rotational cycle. The coordinates of the nuclei of the bearing at reference angle  $\Phi_i$  move according to the cyclic sequences  $G_{19-1+i,i} \rightarrow G_{19-2+i,i} \rightarrow \dots \rightarrow G_{19-18+i,i} \rightarrow G_{19-1+i,i}$  or  $T_{18+i,i} \rightarrow T_{18-1+i,i} \rightarrow \dots \rightarrow T_{18-17+i,i} \rightarrow T_{18+i,i}$ , respectively. The symmetry relations (36) and (40) – which are consequences of the  $C_{2h}$  symmetries of the reference  $GM_1$  and  $TS_{18,1}$  – imply that these sequences are periodic, with period 9, i.e.

$$G_{19-k+i,i} = G_{19-(k+9)+i,i},$$

$$T_{18-k+i,i} = T_{18-(k+9)+i,i}.$$

or

$$\begin{aligned} & G_{19-1+i,i} \rightarrow G_{19-2+i,i} \rightarrow \dots \rightarrow G_{19-9+i,i} \rightarrow G_{19-10+i,i} \\ & = G_{19-10+i,i} \rightarrow G_{19-11+i,i} \rightarrow \dots \rightarrow G_{19-18+i,i} \rightarrow G_{19-1+i,i}, \\ & T_{18+i,i} \rightarrow T_{18-1+i,i} \rightarrow \dots \rightarrow T_{18-8+i,i} \rightarrow T_{18-9+i,i} \\ & = T_{18-9+i,i} \rightarrow T_{18-10+i,i} \rightarrow \dots \rightarrow T_{18-17+i,i} \rightarrow T_{18-18+i,i}. \end{aligned} \quad (44)$$

Each of the cyclic sequences (44) accounts for one pseudo-rotational cycle of the nuclei of the bearing. This means that rotation of the molecular wheel by half a cycle (and then followed by the second half cycle to complete the full cycle) is associated with a full pseudo-rotational cycle (and then by the second full pseudo-rotational cycles) of the nuclei of the bearing.

- (b) The concerted effect of eighteen pseudo-rotating nuclei of the bearing appears *as if* the bearing rotates, even though it does not rotate. This is rationalized by the equivalence of the two generators,  $\tilde{g}$  and  $\tilde{g}$ . The property (a) then implies that when the wheel rotates by half a cycle (and then by another half cycle to complete the full cycle), the bearing appears *as if* it rotates by a full cycle (and then by the second full cycle).
- (c) The cylindrical coordinates of the nuclei at neighboring reference angles  $\Phi_i$  and  $\Phi_{i+1}$  are related to each other,

$$\begin{aligned} & (R_{19-k+i}^{GM}, \Phi_i + \Delta\Phi_{19-k+i}^{GM}, (-1)^{k-1} Z_{19-k+i}^{GM}) \\ & = (R_{19-(k+1)+(i+1)}^{GM}, \Phi_{i+1} - 20^\circ + \Delta\Phi_{19-(k+1)+(i+1)}^{GM}, \\ & \quad -(-1)^k Z_{19-(k+1)+(i+1)}^{GM}). \end{aligned}$$

$$\begin{aligned}
& (\mathbf{R}_{18-k+i}^{\text{TS}}, \Phi_i + \Delta\Phi_{18-k+i}^{\text{TS}}, (-1)^k \mathbf{Z}_{18-k+i}^{\text{TS}}) \\
& = (\mathbf{R}_{18-(k+1)+(i+1)}^{\text{TS}}, \Phi_{i+1} - 20^\circ + \Delta\Phi_{18-(k+1)+(i+1)}^{\text{TS}}, \\
& \quad (-1)^{k+1} \mathbf{Z}_{18-(k+1)+(i+1)}^{\text{TS}}). \tag{45}
\end{aligned}$$

From a mathematical point of view, these relations are trivial. But for the mechanism of the rotating wheel in the pseudo-rotating bearing, they have two consequences (d) and (e) which may appear less obvious:

- (d) The pseudo-rotational sequences of the coordinates of the nuclei of the bearing (in brief: “the pseudo-rotational sequences”) at all reference angles  $\Phi_i$  “look the same”, that means they can be mapped on each other by simple symmetry operations. Specifically, the pseudo-rotational sequence at  $\Phi_i$  can be mapped on the sequence at the neighboring reference angle  $\Phi_{i+1}$  by rotating it about the cylindrical axis by  $\Phi_{i+1} - \Phi_i = 20^\circ$ , together with reflection at the x-y-plane. As a consequence, the pseudo-rotational sequences at reference angles  $\Phi_i$  with odd labels  $i = 1, 3, 5, \dots, 17$  are rotated with respect to each other by  $\Phi_{i+2} - \Phi_i = 40^\circ$ , and they are all above the x-y-plane. In contrast, the pseudo-rotational sequences at reference angles  $\Phi_i$  with even labels  $i = 2, 4, 6, \dots, 18$  are rotated with respect to those with odd labels  $i = 1, 3, 5, \dots, 17$  by  $\Phi_{i+1} - \Phi_i = 20^\circ$ , together with the reflections which put them all below the x-y-plane.
- (e) The pseudo-rotational sequences at neighboring reference angles  $\Phi_{i+1}, \Phi_i$  ( $\Delta i=1$ ) are phase shifted to each other by  $\Delta k=1$ .
- (f) An alternative version of writing eqn. (45) is

$$\begin{aligned}
& (\mathbf{R}_{19-k+i}^{\text{GM}}, \Phi_i + \Delta\Phi_{19-k+i}^{\text{GM}}, (-1)^{k+1} \mathbf{Z}_{19-k+i}^{\text{GM}}) \\
& = (\mathbf{R}_{19-(k+i-1)+i}^{\text{GM}}, \Phi_{i+1} - 20^\circ + \Delta\Phi_{19-(k+i-1)+i}^{\text{GM}}, \\
& \quad (-1)^{i-1} (-1)^{k+i} \mathbf{Z}_{19-(k+i-1)+i}^{\text{GM}}). \\
& (\mathbf{R}_{18-k+1}^{\text{TS}}, \Phi_i + \Delta\Phi_{18-k+1}^{\text{TS}}, (-1)^k \mathbf{Z}_{18-k+1}^{\text{TS}}) \\
& = (\mathbf{R}_{18-(k+i-1)+i}^{\text{TS}}, \Phi_{i+1} - 20^\circ + \Delta\Phi_{18-(k+i-1)+i}^{\text{TS}}, \\
& \quad (-1)^{i-1} (-1)^{k+i-1} \mathbf{Z}_{18-(k+i-1)+i}^{\text{TS}}). \tag{46}
\end{aligned}$$

Again, this is mathematically trivial, but it has important consequences, namely it suffices to know the pseudo-rotational sequence of the cylindrical coordinates of the nucleus at reference angle  $\Phi_{i=1} = 10^\circ$ . The corresponding sequences at reference angle  $\Phi_i$  can then be generated by rotating them from  $\Phi_{i=1}$  to  $\Phi_i$ , with phase shifts by  $i-1$  and with reflection at the x-y-plane for even numbers  $i$ . In practice, it thus suffices to know the pseudo-rotational sequence of the cylindrical coordinates of the nucleus at reference angle  $\Phi_{i=1} = 10^\circ$  - the coordinates at all other reference angle  $\Phi_i$  can then be generated by means of the recipe (46).

- (g) One can combine the pseudo-rotational sequences for the global minimum structures and for the transition states according to the cyclic sequence with alternating  $TS_{k,k+1}$  and  $GM_k$ ,

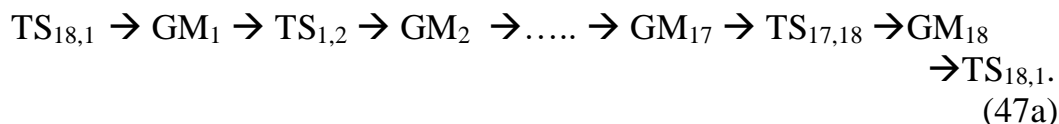

This sequence is illustrated in Figures 2 and S4 which appears as a superposition of Figure S1 for the GMs and Figure S2 or the TSs. The cyclic sequence of the corresponding labels  $k$  (modulo 18) of  $TS_{k,k+1}$  and  $GM_k$  is

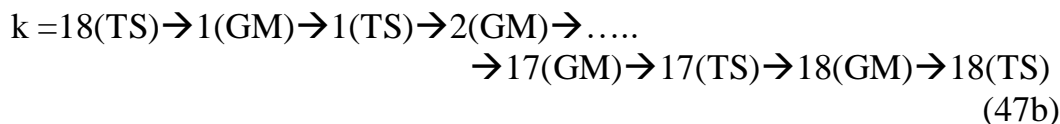

It is convenient to map this cyclic sequence with “twins” of labels  $k$  to the cyclic sequence with “single” labels  $j$  (modulo 36)

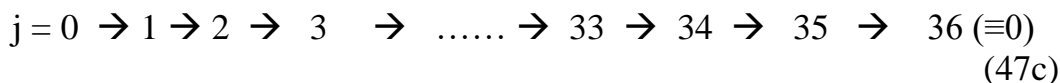

The corresponding sequence of the azimuthal angle of the molecular wheel with respect to the oriented bearing is

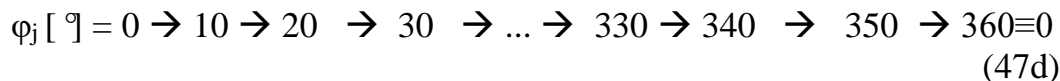

i.e.  $\varphi_j = j * \Delta\varphi$ ,  $\Delta\varphi = 360^\circ/36 = 10^\circ$ .

The general expressions for the coordinates  $R_{19-k+i,i}$  (eqn. (39)) and  $T_{18-k+i,i}$  (eqn. (42)) for the nucleus in the bearing of La-[B<sub>2</sub>@B<sub>18</sub>]-La at reference angle  $\Phi_i = 10^\circ, 30^\circ, 50^\circ, \dots, 350^\circ$  ( $i=1,2,3,\dots,18$ ) yield the corresponding cyclic pseudo-rotational sequence of cylindrical coordinates

$$T_{i,i} \rightarrow G_{i,i} \rightarrow T_{17+i,i} \rightarrow G_{17+i,i} \rightarrow \dots \rightarrow G_{2+i,i} \rightarrow T_{1+i,i} \rightarrow G_{1+i,i} \rightarrow T_{i,i} \quad (47e)$$

In the explicit expressions (39) and (42), the cylindrical reference coordinates for the nuclei of the reference GM<sub>1</sub> and TS<sub>18,1</sub> can no be re-labeled by the single label  $j$  instead of the previous subscript  $k$  and superscripts GM or TS. For example, the corresponding cyclic reference sequence of the cylindrical radii

$$R_{k=18}^{TS} \rightarrow R_1^{GM} \rightarrow R_1^{TS} \rightarrow R_2^{GM} \rightarrow \dots \rightarrow R_{17}^{GM} \rightarrow R_{17}^{TS} \rightarrow R_{18}^{GM} \rightarrow R_{18}^{TS} \quad (47f)$$

is then replaced by

$$R_{j=0} \rightarrow R_1 \rightarrow R_2 \rightarrow R_3 \rightarrow \dots \rightarrow R_{33} \rightarrow R_{34} \rightarrow R_{35} \rightarrow R_{36=0} \quad (47g)$$

Likewise, the cyclic reference sequence of azimuthal deviations

$$\Delta\Phi_{k=18}^{TS} \rightarrow \Delta\Phi_1^{GM} \rightarrow \Delta\Phi_1^{TS} \rightarrow \Delta\Phi_2^{GM} \rightarrow \dots \rightarrow \Delta\Phi_{17}^{GM} \rightarrow \Delta\Phi_{17}^{TS} \rightarrow \Delta\Phi_{18}^{GM} \rightarrow \Delta\Phi_{18}^{TS} \quad (47h)$$

is replaced by

$$\Delta\Phi_{j=0} \rightarrow \Delta\Phi_1 \rightarrow \Delta\Phi_2 \rightarrow \Delta\Phi_3 \rightarrow \dots \rightarrow \Delta\Phi_{33} \rightarrow \Delta\Phi_{34} \rightarrow \Delta\Phi_{35} \rightarrow \Delta\Phi_{36=0}, \quad (47i)$$

and the cyclic reference sequence of Z-coordinates

$$Z_{k=18}^{TS} \rightarrow Z_1^{GM} \rightarrow Z_1^{TS} \rightarrow Z_2^{GM} \rightarrow \dots \rightarrow Z_{17}^{GM} \rightarrow Z_{17}^{TS} \rightarrow Z_{18}^{GM} \rightarrow Z_{18}^{TS}$$

(47j)

is replaced by

$$Z_{j=0} \rightarrow Z_1 \rightarrow Z_2 \rightarrow Z_3 \rightarrow \dots \rightarrow Z_{33} \rightarrow Z_{34} \rightarrow Z_{35} \rightarrow Z_{36=0}. \quad (47k)$$

An explicit list of the cylindrical reference coordinates (47g), (47i), (47k) depending on the azimuthal angle  $\varphi_j$  (47d) is presented in Table S2a.

- (h) The previous symmetry relations (36) and (40) which depend on the  $C_{2h}$  symmetry of the reference  $GM_1$  and  $TS_{18,1}$  give rise to the following symmetry relations for the cylindrical coordinates labeled by the joint index  $j$ :

$$R_{1+\lambda} = R_{1-\lambda} = R_{19+\lambda} = R_{19-\lambda}$$

$$\Delta\Phi_{1+\lambda} = -\Delta\Phi_{1-\lambda} = \Delta\Phi_{19+\lambda} = -\Delta\Phi_{19-\lambda}$$

$$Z_{1+\lambda} = (-1)^\lambda Z_{1-\lambda} = -Z_{19+\lambda} = -(-1)^\lambda Z_{19-\lambda}, \lambda = 0, 1, 2, \dots \quad (48)$$

These rules are valid modulo (36). They can be verified by inspection of Table S2a.

- (i) Using the joint index  $j = 0, 1, 2, 3, 4, \dots$  for the alternating TS and GM structures at the azimuthal angles  $\varphi_j = j \cdot 10^\circ$  of the wheel ( $B_2$ ) with respect to the oriented bearing ( $B_{18}$ ) of the tubular rotor  $La-[B_2@B_{18}]-La$ , the rules (39), (42) and (43) for the pseudo-rotational coordinates of the nucleus of the bearing at the reference angle  $\Phi_{i=1} = 10^\circ$  are translated into the pseudo-rotational sequence

$$(R_2, \Delta\Phi_2, Z_2) \rightarrow (R_1, \Delta\Phi_1, Z_1) \rightarrow (R_{0=36}, \Delta\Phi_{0=36}, -Z_{0=36}) \rightarrow (R_{35}, \Delta\Phi_{35}, -Z_{35}) \rightarrow (R_{34}, \Delta\Phi_{34}, Z_{34}) \rightarrow \dots$$

$$= (R_0, -\Delta\Phi_0, -Z_0) \rightarrow (R_1, -\Delta\Phi_1, Z_1) \rightarrow (R_2, -\Delta\Phi_2, Z_2) \rightarrow (R_3, -\Delta\Phi_3, -Z_3) \rightarrow (R_4, -\Delta\Phi_4, -Z_4) \rightarrow \dots$$

$$= (R_0, -\Delta\Phi_0, |Z_0|) \rightarrow (R_1, -\Delta\Phi_1, |Z_1|) \rightarrow (R_2, -\Delta\Phi_2, |Z_2|) \rightarrow (R_3, -\Delta\Phi_3, |Z_3|) \rightarrow (R_4, -\Delta\Phi_4, |Z_4|) \rightarrow \dots$$

$$\equiv (R_j, -\Delta\Phi_j, |Z_j|) \rightarrow, j = 0, 1, 2, 3, \dots, 35, (36 \equiv 0). \quad (49)$$

The first equation (49) is a consequence of the symmetry rules (36), (40). The minus sign in front of the deviations  $-\Delta\Phi_j$  is in accord with the fact that the pseudo-rotation and the rotation of the wheel are both anti-clockwise. The second equation (49) is verified by inspection of Table S2b. It ensures that all positions of the nucleus at the reference angle  $\Phi_1 = 10^\circ$  are above the x-y-plane. According to the rule (47f), it suffices to know the pseudo-rotational sequence (49) at  $\Phi_1 = 10^\circ$ . All other pseudo-rotational sequences at reference angles  $\Phi_i$  can be generated from the rule (49) by application of the “trivial” eqn. (46) - in practice this means by rotation by  $\Phi_i - \Phi_1$  together with alternating reflections at the x-y-plane. This yields the sequence (47e) of the coordinates of the nuclei of the bearing at  $\Phi_i = 10^\circ, 30^\circ, 50^\circ, \dots, 350^\circ$ . The result is shown in Figures 2 and S1.

Figures 6a, 6b show the cyclic reference sequences of the cylindrical coordinates  $R_j, -\Delta\Phi_j$  for the nucleus of the bearing at the reference angle  $\Phi_1 = 10^\circ$  versus the azimuthal angles  $\varphi_j$  of the molecular wheel. Figure 6c adds the cyclic sequence of the related reference Cartesian coordinates,

$$(X_j = R_j \cos(-\Delta\Phi_j), \quad Y_j = R_j \sin(-\Delta\Phi_j), |Z_j|), j=1,2,\dots,36, (37\equiv 1). \quad (50)$$

Three-dimensional (3d) perspective views of selected pseudo-rotational paths are illustrated in the inserts of Figure S4a. Figure 8a shows the corresponding 2d projection ( $X_j, Y_j$ ).

From the sequence of the pseudo-rotational cylindrical coordinates ( $R_j, -\Delta\Phi_j, |Z_j|$ ) of the nucleus of the bearing at the reference angle  $\Phi_{i=1}$  which are shown in Figures S6 and S7 one can generate the corresponding coordinates at the reference angles  $\Phi_i, i=1, 2, \dots, 18$  as explained in item f above, cf. eqn. (46). The result is shown in Figure S4a.

The corresponding cyclic sequence of the cylindrical coordinates of the two boron nuclei of the wheel ( $j=19,20$ ) depend on  $\varphi_j$ , as follows: Their values of the radii alternate between the values for GM and TS,

$$R_{19}(\varphi_j) = R_{20}(\varphi_j) = R_{19}^{\text{GM}} = 0.8177 \text{ \AA} \text{ for } j = 1, 3, 5, \dots, 33, 35 \text{ and}$$



$$R_{19}(\varphi_j) = R_{20}(\varphi_j) = R_{19}^{\text{TS}} = 0.8182 \text{ \AA} \text{ for } j = 2, 4, 6, \dots, 34, 36.$$

The azimuthal angles (modulo 360 °) are

$$\Phi_{19}(\varphi_j) = \varphi_j = j \cdot \Delta\varphi, \Delta\varphi = 10^\circ, \text{ and } \Phi_{20}(\varphi_j) = \Phi_{19}(\varphi_j) + 180^\circ.$$

The Z-components are

$$Z_{19}(\varphi_j) = -Z_{20}(\varphi_j) = (-1)^{(j-1)/2} Z_{19}^{\text{GM}} = -(-1)^{(j-1)/2} 0.0177 \text{ \AA} \\ \text{for } j = 1, 3, 5, \dots, 33, 35 \text{ and}$$

$$Z_{19}(\varphi_j) = -Z_{20}(\varphi_j) = Z_{19}^{\text{TS}} = 0 \text{ \AA} \text{ for } j = 2, 4, 6, \dots, 34, 36. \quad (51)$$

Figures 2, S4 show the corresponding rotating molecular wheel in the pseudo-rotating bearing of the tubular rotor La-[B<sub>2</sub>@B<sub>18</sub>]-La, for the first half cycle of the wheel ( $0^\circ \leq \varphi_j \leq 180^\circ$ ,  $0 \leq j \leq 18$ ) and the simultaneous first phase-shifted full cycles of the nuclei of the bearing. One readily notices that the pseudo-rotational sequences can be subdivided into four “radial events” (a), (b), (c), (d). For convenience, these events will be described for the pseudo-rotational sequence of the nucleus at reference angle  $\Phi_1 = 10^\circ$ , cf. eqn. (49); the corresponding radii  $R_j(\varphi_j)$  are listed in Table S2a, and they are also obvious in Figures S6a and S7a. (a) Namely for most of the time, specifically when the azimuthal angle of the wheel  $\varphi_j$  is between  $0^\circ$  and approximately  $70^\circ$  ( $j = 0 - 7$ ,  $i = 18, 1 - 4$ , cf. eqn. (47b), (47c)) and then again between about  $130^\circ$  and  $180^\circ$  ( $j = 13 - 18$ ,  $i = 7 - 9$ ), the nucleus at  $\Phi_1 = 10^\circ$  stays on an “inner circle” with radial values  $R_j(\varphi_j) \approx 2.3 \text{ \AA}$ . (b) Then at  $\varphi_j \approx 80^\circ$  ( $j = 8$ ,  $i(\text{TS}) = 4$ ) it switches rather quickly from the inner circle to the outer one, at  $R_j(\varphi_j) \approx 2.6 \text{ \AA}$ . (c) It stays on the “outer circle” for just a rather short time, specifically for  $90^\circ \lesssim \varphi_j \lesssim 110^\circ$  ( $j = 9-11$ ,  $i = 5-6$ ). (d) Finally, at  $\varphi_j \approx 120^\circ$  ( $j = 12$ ,  $i(\text{TS}) = 6$ ) it switches back from the outer circle to the inner one. Equivalent events occur for all nuclei of the bearing at the other reference angles  $\Phi_i$ , but they are phase-shifted with respect to the equivalent switches at  $\Phi_{i-1}$ . The preference of the rather extended “inner” radial circle may be rationalized as consequence of the attractive bonds of the atoms of the wheel and several neighbor atoms which sit near to the short ellipsoidal axis of the bearing. In contrast, the rather short “outer” radial circle is due to the lack of any bonds between the atoms of the wheel and those atoms of the bearing which sit in orthogonal positions, near to the long ellipsoidal axis of the bearing.

Finally, the cyclic sequences of the nuclear cylindrical coordinates of the two metal nuclei ( $i=21,22$ ) are

$$R_{21}(\varphi_j) = R_{22}(\varphi_j) = 0 \text{ \AA} \text{ for } j = 1, 2, 3, 4, \dots, 35, 36,$$

$$\Phi_{21}(\varphi_j) = \Phi_{22}(\varphi_j) = 0^\circ \text{ for } j = 1, 2, 3, 4, \dots, 35, 36,$$

(the value “0°” is arbitrary and irrelevant.)

$$Z_{21}(\varphi_j) = -Z_{22}(\varphi_j) = Z_{21}^{\text{GM}} = 2.3981 \text{ \AA} \text{ for } j = 1, 3, 5, \dots, 33, 35,$$

$$Z_{21}(\varphi_j) = -Z_{22}(\varphi_j) = Z_{21}^{\text{TS}} = 2.3916 \text{ \AA} \text{ for } j = 2, 4, 6, \dots, 34, 36. \quad (52)$$

One may say that the metal nuclei are “spectators” of the rotating molecular wheel in the pseudo-rotating tubular bearing: They just stay at opposite positions of the cylindrical axis, with entirely negligible motions along the z-axis.

### **SI VIII: Rotational and pseudo-rotational paths of the nuclei of the oriented tubular rotor La-[B<sub>2</sub>@B<sub>18</sub>]-La**

This investigation of the oriented tubular rotor La-[B<sub>2</sub>@B<sub>18</sub>]-La has started from the cyclic sequence which leads from the reference global minimum structure GM<sub>1</sub> *via* the transition state TS<sub>1,2</sub> and then *via* GM<sub>2</sub>, TS<sub>2,3</sub>, GM<sub>3</sub>, ..., TS<sub>17,18</sub>, GM<sub>18</sub>, to the reference transition state TS<sub>18,1</sub>, and finally back to GM<sub>1</sub>, cf. Subsections SI I and SI II and eqn. (47). Subsequently, Subsection SI VII has shown that this is equivalent to an alternative sequence for the mechanism of the rotating molecular wheel (B<sub>2</sub>) in the oriented pseudo-rotating tubular bearing (B<sub>18</sub>). Specifically, the wheel rotates in 36 cyclic steps, from azimuthal angle  $\varphi_{j=1} = 10^\circ$  *via*  $\varphi_2 = 20^\circ$ ,  $\varphi_3 = 30^\circ$ , ...,  $\varphi_{35} = 350^\circ$ ,  $\varphi_{36} = 360^\circ \equiv 0^\circ$ , and finally back to  $\varphi_{37} \equiv \varphi_1 = 370^\circ \equiv 10^\circ$ , labeled by  $j = 1, 2, 3, \dots, 34, 35, 36$  and  $37(\equiv 1, \text{ modulo } 36)$ , respectively. At the same time, the eighteen boron nuclei of the tubular bearing at the reference angles  $\Phi_i = 10^\circ, 30^\circ, \dots, 350^\circ$  pseudo-rotate along 36 positions on pseudo-rotational paths, with the same labels  $j = 1, 2, 3, \dots, 35, 36$ , and  $37 \equiv 1$  (modulo 36), respectively. The pseudo-rotational positions for  $j = 1, 2, \dots, 18$  are the same as for  $j = 19, 20, \dots, 36$ , i. e. when the wheel rotates by a full cycle, then the nuclei of the bearing perform two pseudo-rotational cycles. It suffices to know the pseudo-rotational sequence of the boron nucleus at  $\Phi_1 = 10^\circ$  - from this, the pseudo-rotational sequences of the nuclei at the other reference angles  $\Phi_2 = 30^\circ$ ,  $\Phi_3 = 50^\circ$  etc. can be generated by simple recipes, cf. eqns. (45), (46). At the same time, the metal nuclei stand practically still, except for extremely small amplitude vibrations in opposite directions along the z-axis.

The goal of this Sub-section SI VIII is to extend the 36 sets of rotational and pseudo-rotational positions of the nuclei of the tubular rotor La-[B<sub>2</sub>@B<sub>18</sub>]-La labeled by  $j=1,2, \dots, 36, 37\equiv 1$  by a set of  $18+2+2=22$  continuous paths which lead through, or close to the coordinates for the pseudo-rotational sequences of the nuclei of the bearing, through the coordinates for the rotational sequences of the nuclei of the wheel, and for the metal nuclei. This set of paths will be called the “rotational/pseudo-rotational path” of the tubular rotor. Its construction is divided into three parts, namely first for the pseudo-rotating nuclei of the bearing, second for the rotating nuclei of the wheel, and third for the metal nuclei.

For the first task, it suffices to construct the pseudo-rotational path which leads through, or close to the coordinates of the pseudo-rotational sequence of the boron nucleus of the bearing at the reference angle  $\Phi_{i=1} = 10^\circ$ . The remaining pseudo-rotational paths for the nuclei of the bearing at the other reference angles  $\Phi_i, i = 2, 3, \dots, 18$  can be generated by rotations of the “first” path by  $i*20^\circ$ , with alternating reflections at the x-y-plane and with phase shifts, in accord with eqns. (45), (46).

To construct the pseudo-rotational path of the nucleus of the oriented tubular bearing of La-[B<sub>2</sub>@B<sub>18</sub>]-La at  $\Phi_{i=1} = 10^\circ$ , the sequence of 36 pseudo-rotational positions with cylindrical coordinates  $\{R_j(\varphi_j), -\Delta\Phi_j(\varphi_j), |Z_j(\varphi_j)|\}$ ,  $j=1,2,\dots,36$  (discarding those for  $j=0$  because they are equivalent to  $j=36$ ) should be extended to corresponding continuous functions depending on the azimuthal angle  $\varphi$  of the wheel, subject to two criteria: (a) They should be in accord with the symmetries (48) of the discrete sequences  $\{R_j(\varphi_j), -\Delta\Phi_j(\varphi_j), |Z_j(\varphi_j)|\}$  which are imposed by the C<sub>2h</sub> symmetries of the reference TS<sub>18,1</sub> and the reference GM<sub>1</sub>. (b) For  $\varphi \rightarrow \varphi_j$ , the continuous functions should approach the discrete values of the coordinates,  $\{R_j(\varphi_j), -\Delta\Phi_j(\varphi_j), |Z_j(\varphi_j)|\}$ . A solution of this problem is suggested by Figure S7a which shows the discrete coordinates of the nucleus of the bearing at  $\Phi_1 = 10$  after back-rotation from  $\varphi_j$  by  $\Phi_1 = 10^\circ$  to  $\phi_j = \varphi_j - 10^\circ$ . Accordingly, the two criteria are satisfied by (a) corresponding representations of the continuous functions by symmetry-adapted Fourier series depending on  $\phi_j = \varphi_j - 10^\circ$ , and (b) by least squares fits of the Fourier series to the discrete coordinates at the pseudo-rotational nuclear positions labeled  $j = 1, 2, \dots, 36$ . Specifically, we define

$$(a) R_j(\varphi_j) = R(\varphi_j - 10^\circ) = R(\phi_j) \quad (53a)$$

together with the symmetry adapted Fourier series

$$R_M(\phi) = \sum_{\mu=0}^M c^{(R)}_{\mu} \cos(2 \mu \phi) \quad (53b)$$

of order  $M$ , with radial Fourier coefficients  $c^{(R)}_{\mu}$  such that

$$R_M(\phi_j) \rightarrow R_j(\phi_j) \text{ for increasing values of } M. \quad (53c)$$

Likewise

$$-\Delta\Phi_j(\phi_j) = -\Delta\Phi(\phi_j - 10^\circ) = -\Delta\Phi(\phi_j) \quad (54a)$$

together with the symmetry adapted Fourier series

$$-\Delta\Phi_M(\phi) = \sum_{\mu=1}^M c^{(\Delta\Phi)}_{\mu} \sin(2 \mu \phi) \quad (54b)$$

of order  $M$ , with angular Fourier coefficients  $c^{(\Delta\Phi)}_{\mu}$  such that

$$-\Delta\Phi_M(\phi_j) \rightarrow -\Delta\Phi_j(\phi_j) \text{ for increasing values of } M, \quad (54c)$$

as well as

$$|Z_j|(\phi_j) = |Z|(\phi_j - 10^\circ) = |Z|(\phi_j) \quad (55a)$$

together with the symmetry adapted Fourier series

$$|Z_M|(\phi) = \sum_{\mu=0}^M c^{(Z)}_{\mu} \cos(2 \mu \phi) \quad (55b)$$

of order  $M$ , with Fourier coefficients  $c^{(Z)}_{\mu}$  for  $|Z|$  such that

$$|Z_M|(\phi_j) \rightarrow |Z_j|(\phi_j) \text{ for increasing values of } M. \quad (55c)$$

The Fourier coefficients in the expressions (53b), (54b), (55b) are determined by least squares fits such that

$$(b) \sum_{j=1}^{36} [R_j(\phi_j) - R_M(\phi_j - 10^\circ)]^2 = \text{minimum} \quad (53d)$$

$$\sum_{j=1}^{36} [\Delta\Phi_j(\phi_j) - \Delta\Phi_M(\phi_j - 10^\circ)]^2 = \text{minimum} \quad (54d)$$

$$\sum_{j=1}^{36} [|Z_j|(\phi_j) - |Z_M|(\phi_j - 10^\circ)]^2 = \text{minimum} \quad (55d)$$

By construction, the Fourier series (53b), (54b), (55b) satisfy the symmetry relations (48). The corresponding factor “2” in the argument of the cos- and sin-

functions accounts for two cycles along the pseudo-rotational path during a single cycle of the molecular wheel in the oriented tubular bearing.

The Fourier series (53b), (54b), (55b) serve as approximations to the ideal set of continuous functions  $\{R(\varphi - 10^\circ), -\Delta\Phi(\varphi - 10^\circ), |Z|(\varphi - 10^\circ)\}$ , depending on the number  $M+1$  (or  $M$ ) of Fourier coefficients. In practice, the choice of  $M$  calls for a compromise: On the one hand, increasing numbers  $M$  allow the continuous functions to approach the discrete values better and better, cf. eqns. (53c), (54c), (55c). On the other hand, increasing numbers  $M$  cause artificial wiggles of the smooth functions. Systematic investigations reveal that  $M = 8$  is a satisfactory compromise. The corresponding Fourier coefficients are

$$c^{(R)}_{\mu} (\text{\AA}) = 2.349, -0.114, 0.134, -0.058, 0.023, -0.003, -0.016, 0.006, -0.008$$

for  $\mu = 0 - 8$ , (53e)

$$c^{(\Delta\Phi)}_{\mu} (^\circ) = -1.568, 0.306, -0.048, -0.424, -0.203, -0.066, 0.000, 0.008$$

for  $\mu = 1 - 8$ , (54e)

$$c^{(Z)}_{\mu} (\text{\AA}) = 0.788, 0.056, 0.005, 0.028, -0.023, 0.016, 0.001, -0.002, 0.003$$

for  $\mu = 0 - 8$ . (55e)

These Fourier coefficients are robust with respect to their numbers  $M+1$  (or  $M$ ).

The resulting functions  $\{R_{M=8}(\varphi - 10^\circ), -\Delta\Phi_{M=8}(\varphi - 10^\circ), |Z|_{M=8}(\varphi - 10^\circ)\}$  are documented in Figure S6 and S7a. They establish the pseudo-rotational path of the nucleus of the bearing at the reference angle  $\Phi_{i=1} = 10^\circ$ , back-rotated by  $-10^\circ$ . The corresponding paths of the nuclei of the bearing centered at  $\Phi_i$ ,  $i = 2, 3, \dots, 18$  are generated by forward rotation by  $10^\circ$  for  $i=1$ , and then by sequential steps of  $\Delta\Phi = 20^\circ$ , with alternating reflections at the x-y-plane, in accord with the previous recipe SI VII(f), cf. eqn. (46). The result is shown in Figures 2 and S4a.

The second and third tasks of this Subsection are rather easy, compared to the first one. Namely the rotational paths of the two nuclei ( $n=19,20$ ) of the molecular wheel are nearly circular. The explicit expressions are

$$R_{19}(\varphi) = R_{20}(\varphi) = R_w + \Delta R_w \cos(18\varphi),$$

$$R_w = .5(R_{19}^{GM} + R_{19}^{TS}) = 0.81795 \text{ \AA},$$

$$\Delta R_w = .5(R_{19}^{TS} - R_{19}^{GM}) = 0.00025 \text{ \AA},$$

$$\Phi_{19}(\varphi) = \varphi, \quad \Phi_{20}(\varphi) = \varphi + 180^\circ,$$

$$Z_{19}(\varphi) = -Z_{20}(\varphi) = Z_{19}^{\text{GM}} \sin(9\varphi), Z_{19}^{\text{GM}} = -0.0177 \text{ \AA}, \quad (56)$$

cf. eqn. (51). The associated paths of the metal nuclei are along the Z-axis,

$$R_{21}(\varphi) = R_{22}(\varphi) = 0 \text{ \AA},$$

$$\Phi_{21}(\varphi) = \Phi_{22}(\varphi) = 0^\circ,$$

$$\begin{aligned} Z_{21}(\varphi) = -Z_{22}(\varphi) &= Z_m + \Delta Z_m \cos(18\varphi), \\ Z_m &= .5(Z_{21}^{\text{GM}} + Z_{21}^{\text{TS}}) = 2.39485 \text{ \AA}, \\ \Delta Z_m &= .5(Z_{21}^{\text{TS}} - Z_{21}^{\text{GM}}) = -0.00325 \text{ \AA}, \end{aligned} \quad (57)$$

cf. eqn. (52), i. e. the two metal nuclei serve as spectators which are practically fixed at the cylindrical axis, except for tiny modulations.

### **SI IX: Support of the model of the rotating molecular wheel in the pseudo-rotating bearing by vector arrow plots of two selected normal modes of La-[B<sub>2</sub>@B<sub>18</sub>]-La**

Subsection SI VII reveals the oriented model La-[B<sub>2</sub>@B<sub>18</sub>]-La as tubular rotor with molecular wheel (B<sub>2</sub>) rotating in the pseudo-rotating tubular bearing (B<sub>18</sub>). To support this picture, we shall now add information about the directions of the nuclear motions which lead along these sequences. For this purpose, we shall first consider the nuclear motions which are directed from the reference transition state TS<sub>18,1</sub> to the neighboring reference global minimum structure GM<sub>1</sub>. The results will be extrapolated to the nuclear motions from the other TS<sub>k,k+1</sub> to the neighboring GM<sub>k+1</sub>. By analogy, we shall also consider the nuclear motions which are directed (approximately) from GM<sub>1</sub> to the next neighboring TS<sub>1,2</sub>. This will be extrapolated to the nuclear motions from the other GM<sub>k</sub> to the next neighboring TS<sub>k,k+1</sub>. The presentation and analyses below are rather detailed for the nuclear motions from the TSs to the GMs and more compact for the analogous motions from the GMs to the TSs. Finally, we shall arrive at a set of nuclear motions which are directed along the pseudo-rotational sequence (47).

In general, the nuclear motions which lead across a transition state toward the next global minimum structure are specified by the transition state's normal mode with imaginary frequency. In the present reference case of TS<sub>18,1</sub>, these motions are illustrated by the vector arrow plot of the normal mode with imaginary frequency ( $|\hbar\omega_i^{\text{TS}}| = 217.90 \text{ h c cm}^{-1}$ , IRREP b<sub>g</sub>), cf. Figure S3b. The

vectors at nucleus  $i$  of the reference  $\text{TS}_{18,1}$  will be denoted by Cartesian coordinates,  $\Delta\mathbf{Q}_i^{\text{TS}} = (\Delta X_i^{\text{TS}}, \Delta Y_i^{\text{TS}}, \Delta Z_i^{\text{TS}})$ . They are plotted with finite lengths and arbitrary scaling, and with their tails attached to the positions of nucleus  $i$ , as specified in Subsection SI II and in Table S2a. The finite vectors  $\Delta\mathbf{Q}_i^{\text{TS}}$  are proportional to infinitesimally small vectors,  $\Delta\mathbf{Q}_i^{\text{TS}} \sim d\mathbf{Q}_i^{\text{TS}}$ , which cannot be illustrated. The advantage of using finite vectors  $\Delta\mathbf{Q}_i^{\text{TS}}$  for illustrations is that they show the directions of the  $d\mathbf{Q}_i^{\text{TS}}$ , and they also illustrate the relative lengths of the  $d\mathbf{Q}_i^{\text{TS}}$  for the different nuclei. In a classical picture, the  $d\mathbf{Q}_i^{\text{TS}}$  are proportional to the nuclear velocities  $d\mathbf{Q}_i^{\text{TS}}/dt$ . With proper scaling of the time interval  $\Delta t$ , one may set  $d\mathbf{Q}_i^{\text{TS}}/dt = \Delta\mathbf{Q}_i^{\text{TS}}/\Delta t$ . That means that the classical nuclear velocities are along the directions of the vectors  $\Delta\mathbf{Q}_i^{\text{TS}}$ , and “long” and “short” vectors  $\Delta\mathbf{Q}_i^{\text{TS}}$  correspond to “fast” and “slow” classical velocities. One may define a semiclassical normalization of the vectors and the related time interval  $\Delta t$ , (somewhat arbitrarily, of course) by setting the related classical nuclear kinetic energies equal to the quantum energy of the local  $b_g$  mode with imaginary frequency,  $.5(|\hbar\omega_i^{\text{TS}}| = .5 \sum_i m_i (d\mathbf{Q}_i^{\text{TS}}/dt)^2 = .5 \sum_i m_i (\Delta\mathbf{Q}_i^{\text{TS}}/\Delta t)^2$ .

Close inspection of the vector arrows  $\Delta\mathbf{Q}_i^{\text{TS}}$  of the  $b_g$  mode with imaginary frequency for the reference  $\text{TS}_{18,1}$  in Figure S3b reveals that there are just four prominent nuclei of the bearing which move rather rapidly, all with the same speed, namely the quadruplet of nuclei labeled  $i(\text{TS}) = 4, 6, 13, 15$ ; according to eqn. (47) (cf. Table S2a and Figure 7a), these correlate with labels  $j = 8, 12, 26, 30$ , respectively. Their directions are in accord with IRREP  $b_g$ ; in particular, the vector arrows for nucleus 4 and the opposite nucleus 13 point toward decreasing radii, whereas the vector arrows for nucleus 6 and the opposite nucleus 15 point to increasing radii. In contrast, all other nuclei of the bearing move rather slowly. At the end of this Subsection, this curious result will provide a nice confirmation of the scenario of the rotating wheel in the pseudo-rotating tubular bearing. As first hint to this end, we notice that the two labels  $i(\text{TS}) = 15$  and 13 of the nuclei which move rapidly towards larger and smaller radii, correlate with the second “radial event” (b) at  $\varphi_{j=8} = \varphi_{k,k+1=4,5}$  ( $j=8, k(\text{TS})=4$ ) and with the fourth one (d) at  $\varphi_{j=12} = \varphi_{k,k+1=6,7}$  ( $j=12, k(\text{TS})=6$ ) which have been diagnosed towards the end of the Sub-section SI VII, namely (b) the rapid transitions from the “inner radial circle” to the “outer” one, (d) and back, during the first pseudo-rotational sequence i.e. during the first half cycle of the wheel. Specifically, when the wheel moves from  $\varphi_{k,k+1=18,1} = 0^\circ$  via  $\varphi_{1,2}, \varphi_{2,3}, \varphi_{3,4}$  to  $\varphi_{4,5}$  and then via  $\varphi_{5,6}$  to  $\varphi_{6,7}$ , then the labels of the nuclei of the bearing which sit at the reference site at  $\Phi_{i=1} = 10^\circ$  vary from the initial  $i=1$  via 18, 17, 16 to 15 (*sic!*) and then via 14 to 13 (*sic!*), respectively. Thus as long as the wheel moves from  $\varphi = \varphi_{k,k+1=18,1} = 0^\circ$  to  $\varphi_{3,4} = 70^\circ$ , the radius of nucleus  $i=1$  of the bearing at  $\Phi_{i=1} = 10^\circ$  remains at the “inner circle,  $R_k^{\text{TS}} \approx 2.3 \text{ \AA}$ , corresponding to the “radial event (a)”. When the wheel

arrives at  $\varphi_{4,5} = 80^\circ$  and subsequently at  $\varphi_{6,7} = 120^\circ$ , then the nucleus at  $\Phi_{i=1} = 10^\circ$  moves rapidly from the “inner radial circle” to the “outer” one ( $R_{k=5}^{\text{TS}} \approx 2.6\text{\AA}$ ) (event (b)), and back (event (d)), respectively. The opposite nuclei 6 and 4 take the same roles during the second pseudo-rotational sequence i. e. during the second half cycle of the wheel.

As expected for the motion from  $\text{TS}_{18,1}$  ( $\varphi_{j=1} = \varphi_{k,k+1=18,1} = 0^\circ$ ) to  $\text{GM}_1$  ( $\varphi_{j=2} = \varphi_{k=1} = 10^\circ$ ), the vector arrows at the two nuclei of the wheel ( $i=19,20$ ) point to (anti-clockwise) rotation of the wheel with respect to the bearing. These vectors at the wheel are shorter than the prominent ones at the nuclei of the bearing ( $i(\text{TS}) = 4, 6, 13, 15$ ), i. e. the pseudo-rotational speed of the boron nuclei during the transitions from short to long radii, and back (events (b) and (d)) is even higher than the speed of the rotating nuclei of the wheel. For comparison, the metal nuclei stand practically still - this confirms their role as “spectators” sitting on the cylindrical axis of the tubular rotor  $\text{La}[\text{B}_2@B_{18}]\text{-La}$ .

Starting from the nuclear motions which lead from the reference  $\text{TS}_{18,1}$  to the reference  $\text{GM}_1$ , as illustrated in Figure S3b, it is straightforward to generate the corresponding vector arrow plots of the nuclear motions which point from arbitrary  $\text{TS}_{k,k+1}$  to the next  $\text{GM}_{k+1}$ , namely by  $k$ -fold applications  $g^k$ ,  $\tilde{g}^k$  or  $\tilde{g}^{\sim k}$  of one of the three equivalent generators  $g$ ,  $\tilde{g}$  or  $\tilde{g}^{\sim}$  which have been introduced in Sub-sections SI I and SI VII. For convenience, we shall employ  $\tilde{g}^k$  for the generation, and  $\tilde{g}^{\sim k}$  for the analysis. From a mathematical perspective, we recall that the set of operators  $\{\tilde{e}^{\sim}, \tilde{g}, \tilde{g}^2, \dots, \tilde{g}^{17}\}$  establishes the cyclic group  $\tilde{C}_{18}(\text{M})$  which can be applied to any molecular structure, cf. Sub-section SI I. It can be applied, therefore, not only to the original  $\text{TS}_{18,1}$ , as done above, but also to a modified version of  $\text{TS}_{18,1}$  with the nuclear positions shifted by infinitesimal or by finite displacements  $\mathbf{dQ}_n^{\text{TS}}$  and  $\Delta\mathbf{Q}_n^{\text{TS}}$ . That means it can be applied to the tails and to the heads of the vector arrows, with the tails fixed at the nuclear positions of  $\text{TS}_{18,1}$ , or in other words it can be applied to the set of vector arrows which are shown in Figure S3b.

Applications of  $\tilde{g}, \tilde{g}^2, \dots, \tilde{g}^8$  to the vector arrows shown in Figure S3b for the  $b_g$  mode with imaginary frequency of the reference  $\text{TS}_{18,1}$  generate the vector arrow plots of the corresponding  $b_g$  modes of  $\text{TS}_{1,2}, \text{TS}_{2,3}, \dots, \text{TS}_{8,9}$ . The superposition of these vector arrow plots is shown in Figure S3c. Accordingly, these transition states are crossed sequentially during the first half cycle of the wheel, and at the same time during the first full pseudo-rotational cycle of the bearing. Indeed, the vector arrows attached to the two nuclei of the wheel support the picture of the half-cycle rotation of the wheel. Likewise, the arrows attached to the eighteen nuclei of the bearing support the picture of a full cycle of pseudo-rotation, with



the corresponding four “radial events” (a)-(d). In contrast, the metal nuclei stand practically still as spectators on the nuclear axis. Equivalent results are obtained for the second half rotational cycle of the wheel and for the simultaneous second full pseudo-rotational cycle of the bearing. In any case, by construction all the corresponding nuclear motions are directed from the TSs to the next GMs beyond the reference GM<sub>1</sub>, specifically to GM<sub>2</sub>, GM<sub>3</sub>, ..., GM<sub>9</sub>.

For the analysis of the results shown in Figure S3c it is convenient to switch from the generator  $\tilde{g}$  to  $\tilde{g}^{\sim}$  and to consider a magnification of the corresponding pseudo-rotational sequence of the vectors which are attached to the positions of the nucleus of the bearing at the reference angle  $\Phi_{i=1} = 10^\circ$ . The magnification is illustrated in Figure S7b where it is back-rotated by  $-\Phi_{n=1} = -10^\circ$  such that it appears as centered at  $0^\circ$  - this back-rotation allows an illuminating comparison with the pseudo-rotational sequence of positions shown in Figure S7a. Apparently, the arrows attached to the nuclear positions for the transition states point toward the positions of the next neighbouring global minimum structures. Obviously, the arrow plots shown in Figures S3c and S7b support the picture of the rotating wheel in the pseudo-rotating bearing.

Next we seek for the analogous vector arrow plot of a normal mode of the reference global minimum structure GM<sub>1</sub> with the nuclear motions directed from GM<sub>1</sub> to the next neighboring TS<sub>1,2</sub>. There is, however, no rigorous rule for the choice of the suitable mode of GM<sub>1</sub>; in fact, it is not even guaranteed that such normal mode exists – hence we should anticipate that whatever choice we make, the nuclear arrows may not point directly to the next TS<sub>1,2</sub>, but just approximately. In practice, we apply three criteria for the proper choice of the normal mode of GM<sub>1</sub> which should point (approximately) to TS<sub>1,2</sub>. The first criterion is a rigorous one i. e. the normal mode must have IRREP  $b_g$  of the local C<sub>2h</sub> symmetry of GM<sub>1</sub>, because this is the only IRREP which allows the vector arrows for the two nuclei of the molecular wheel to be directed toward rotation. The second criterion is empirical, i. e. we request that the vibrational frequency of the  $b_g$  mode of GM<sub>1</sub> should be close to the absolute value of the imaginary frequency mode of the reference TS<sub>18,1</sub> ( $|\hbar\omega_i^{GM}| = 217.90 \text{ h c cm}^{-1}$ ). This criterion ensures that the resulting model potential  $V(\varphi)$  for the rotating wheel in the pseudo-rotating bearing is approximately cosinusoidal, cf. Figure 3 and S5; alternative choices with extremely low or high  $b_g$  mode frequencies at GM<sub>1</sub> compared to TS<sub>18,1</sub> would imply model potentials with sharp peaks at the potential minima or at the potential barriers – this would appear as unrealistic. Figure S3a shows that this second criterion suggests the  $b_g$  mode labeled  $v^{GM}=8$  ( $\hbar\omega_8^{GM} = 234.79 \text{ h c cm}^{-1}$ ). The third criterion is again empirical, i. e. we request that the chosen  $b_g$  mode of GM<sub>1</sub> must not direct the nuclear motions entirely away from TS<sub>1,2</sub>. For this

criterion, we have also checked the two  $b_g$  modes of  $GM_1$  with the next higher or the next lower frequencies, compared to  $v^{GM} = 8$ . It turns out that the next higher frequency  $b_g$  mode labeled  $v^{GM} = 13$  ( $\hbar\omega_{13}^{GM} = 342.89 \text{ h c cm}^{-1}$ ) kicks the two metal nuclei away from the cylindrical axis – this is unacceptable. The next lower frequency  $b_g$  mode labeled  $v^{GM} = 2$  ( $\hbar\omega_2^{GM} = 156.58 \text{ h c cm}^{-1}$ ) points away from  $TS_{1,2}$  – this is again unacceptable. For our purpose we choose, therefore, the  $b_g$  mode labeled  $v^{GM} = 8$  ( $\hbar\omega_8^{GM} = 234.79 \text{ h c cm}^{-1}$ ). Its vector arrow plot is shown in Figure S3b.

After the detailed discussion of the vector arrow plot of the  $b_g$  mode of the reference  $TS_{18,1}$  shown in Figure S3b, one immediately recognizes that the chosen  $b_g$  mode of the reference  $GM_1$  displays a similar pattern. Accordingly, the vector arrows at the nuclei of the wheel ( $i=19,20$ ) point to (anti-clockwise) rotation of the wheel, and there are just four prominent nuclei of the bearing which move rather quickly, namely those labeled  $i(GM) = 4, 7, 13, 16$ . According to eqn. (47), these labels correlate with  $j = 7, 13, 25, 31$ , respectively. All other boron nuclei move rather slowly, and the metal “spectators” stand practically still. For more quantitative comparison, let us recall that the chosen  $b_g$  mode of the reference  $TS_{18,1}$  has analogous four nuclei of the bearing which promote rapid pseudo-rotation, namely those labeled  $i(TS) = 4, 6, 13, 15$ , correlating with  $j = 8, 12, 26, 30$ , cf. eqn. (47). Obviously, the quadruplets of labels  $j$  for the chosen  $b_g$  modes of  $GM_1$  and  $TS_{18,1}$  are next neighbors to each other. This implies that the mechanism of the pseudo-rotation with four “radial events” – (a) rather long circulation at small radii  $R_j \approx 2.3 \text{ \AA}$ , (b) rapid transition from small to large radii, (c) short circulation at large radii  $R_j \approx 2.6 \text{ \AA}$ , (d) back-transition to small radii  $R_j \approx 2.3 \text{ \AA}$ , - which has been diagnosed in Subsection SI VII, is confirmed not only by the nuclear motions of  $TS_{18,1}$  and the  $TS_{k,k+1}$  which are generated from  $TS_{18,1}$ , but also by those of  $GM_1$  and the  $GM_k$  which are generated from  $GM_1$ . In contrast with the prominent four arrows for the pseudo-rotation of the bearing of  $TS_{18,1}$  which are larger than the two arrows for the rotation of the wheel, the prominent four arrows for the pseudo-rotation of the bearing of  $GM_1$  are, however, smaller than those for the rotation of the wheel. This suggests that the events (b) and (d) occur with highest speed when the molecular wheel has moved from  $\varphi_{j=1} = 0$  for  $TS_{18,1}$  to azimuthal angles  $\varphi_j = 80^\circ, 120^\circ, 260^\circ, 300^\circ$  for transition states, ( $j = 8, 12, 26, 30$ ), whereas the neighboring angles  $70^\circ, 130^\circ, 250^\circ, 310^\circ$  for global minimum structures ( $j = 7, 13, 25, 31$ ) mark the related on- or off-sets of the events (b) and (d).

Starting from the chosen  $b_g$  mode of the reference  $GM_1$  (Figure S3b), one can generate and analyze the  $b_g$  modes of the sequence of the other  $GM_2, GM_3, \dots, GM_{18}$  in the same way as shown above for the transition states, i. e. by

applications of  $\tilde{g}$ ,  $\tilde{g}^2$ , ...,  $\tilde{g}^{17}$  for generation and  $g^{\sim}$ ,  $g^{\sim 2}$ , ...,  $g^{\sim 17}$  for analysis. The resulting superposition of the first nine vector arrow plots for the  $b_g$  modes of GM<sub>1</sub> – GM<sub>9</sub> is documented in Figure S3c, together with the vector arrow plots for the neighbouring transition states. A magnification of the vector arrow plot in the domain of the nucleus at the reference angle  $\Phi_1 = 10^\circ$  is shown in Figure S7b, together with the vector arrows for the neighbouring transition states.

Figure S3c shows the superposition of all vector arrow plots of the chosen  $b_g$  normal modes for the transition states and for the global minimum structures. Magnifications are shown in Figure S7b. These Figures confirm the nuclear motions of the tubular rotor La-[B<sub>2</sub>@B<sub>18</sub>]-La with its molecular wheel (B<sub>2</sub>) rotating in the pseudo-rotating tubular bearing (B<sub>18</sub>).

## References

33. C. Adamo and V. Barone, *J. Chem. Phys.*, 1999, **110**, 6158.
34. R. Krishnan, J. S. Binkley, R. Seeger and J. A. Pople, *J. Chem. Phys.*, 1980, **72**, 650.
35. D. Feller, *J. Comput. Chem.*, 1996, **17**, 1571.
36. L. Schuchardt, B. T. Didier, T. Elsethagen, L. Sun, V. Gurumoorthi, J. Chase, J. Li and T. L. Windus, *J. Chem. Inf. Model.*, 2007, **47**, 1045.
37. M. J. Frisch, *et al.*, *Gaussian 09, Revision D.01*, Gaussian Inc., Wallingford, CT, 2009.
